# Supplementary material for: Modulation of Host Immune Response during Leishmania infantum Natural Infection: A Whole-Transcriptome Analysis of the Popliteal Lymph Nodes in Dogs
Source: Front Immunol. 2022 Jan 4;12:794627. doi: 10.3389/fimmu.2021.794627 (PMC8763708; doi:10.3389/fimmu.2021.794627)
Supplement: Supplementary file 5 [file Table_3.xlsx]

## Sheet: all_DEGs
TABLE S3. Complete results of functional enrichment analyses.
NES: normalized enrichment score.
Term ID	Description	set Size	enrichment Score	NES	pvalue	p.adjust	qvalues	rank	leading edge	Gene IDs
GO:0006952	defense response	395	0.378971	1.6419	1.77408e-08	5.95381e-05	5.54446e-05	1556	tags=22%, list=11%, signal=20%	CHI3L1/SLPI/ACOD1/LOC111089962/CCL5/LOC100687054/LTF/LOC480600/LOC611538/MMP8/NUPR1/CAMP/CCL8/ELANE/S100A12/JCHAIN/TREM1/OLR1/KLRK1/NR1H3/LOC403585/IL1RN/CXCR6/LGALS3/AOAH/ISG20/STAB1/CEBPB/VSIG4/IFNG/CMKLR1/PYCARD/DAPK1/RAB20/CASP4/CCR5/CCR2/C3AR1/CXCL16/CXCL10/CCR1/PRDX2/CD163/HCK/OAS2/CCRL2/KLRD1/MPEG1/SMPD1/FCER1G/RHBDD3/OASL/PTAFR/MYO1C/LY96/CFI/CD96/CSF1R/CXCL8/IL31RA/CARD9/RARRES2/ANXA1/BA…
GO:0048193	Golgi vesicle transport	130	0.495097	1.93704	1.59425e-06	0.00267516	0.00249123	3490	tags=48%, list=25%, signal=37%	RAB26/LMAN1/SEC24D/NBAS/KDELR2/ERGIC3/YIF1B/TMED3/SEC13/PREB/SEC24A/COPE/MPPE1/TMED9/LMAN2/TMED2/TMEM115/USO1/COPZ2/YIF1A/BLZF1/COPG1/SAR1A/RAB1A/SYS1/SEC23B/SEC23A/STX5/USE1/YIPF5/PKDCC/SAR1B/LOC102155463/COPB1/GOLPH3L/COPB2/ARCN1/SEC24C/ERGIC2/VPS51/LAMP1/ARFGEF2/TEX261/TRAPPC4/DOP1B/MIA3/SCFD1/SEC16A/VAMP5/MIA2/LOC480840/SEC16B/TRAPPC1/AP3D1/SEC22A/SEC23IP/TRAPPC3/ARF4/TMED4/TRAPPC6B/CLN3/SEC3…
GO:0034976	response to endoplasmic reticulum stress	110	0.512267	1.96952	3.10672e-06	0.00275225	0.00256303	2707	tags=43%, list=19%, signal=35%	BHLHA15/NUPR1/SEL1L/NR1H3/ERN1/PDIA4/HSP90B1/SEC61B/HERPUD1/CEBPB/ATF3/HSPA5/TBL2/P4HB/EDEM2/ERLEC1/TMED2/EDEM3/PDIA3/CXCL8/ATF4/NIBAN1/POMT2/RCN3/CDK5RAP3/NFE2L2/UBE2J1/NPLOC4/TOR1A/OS9/TMEM117/VCP/TMEM129/LOC480667/CANX/UBXN4/BAX/NR1H2/FBXO27/PRKN/SERINC3/GORASP2/NCK2/ERLIN2/SEC16A/GRINA/TMEM33
GO:0006955	immune response	438	0.339938	1.50152	3.2804e-06	0.00275225	0.00256303	2310	tags=26%, list=16%, signal=22%	SLPI/CCL5/LOC100687054/LTF/LOC480600/LOC611538/CAMP/CCL8/ELANE/S100A12/JCHAIN/KLRK1/CD160/DLA-12/IL1RN/CXCR6/PDCD1LG2/LGALS3/CTSK/LOC403631/C1QB/VSIG4/FTH1/IFNG/CMKLR1/PYCARD/DAPK1/RAB20/VTCN1/CCR5/CCR2/EOMES/C3AR1/CXCL16/CXCL10/C1QA/CCR1/PIGR/TBX21/CTSS/HCK/OAS2/TNFSF10/CCRL2/KLRD1/SLA2/SMPD1/FCER1G/OASL/LTBR/DYSF/MYO1C/SMAD6/LY96/CFI/CD96/CXCL8/IL31RA/CARD9/RARRES2/ANXA1/C5AR2/FASLG/NECTIN2/CDC…
GO:0030163	protein catabolic process	389	0.341044	1.46727	1.51597e-05	0.00862322	0.00803034	3654	tags=36%, list=26%, signal=27%	GZMA/NUPR1/RAB26/APOE/SEL1L/HSP90B1/CTSK/SEC61B/HERPUD1/IFNG/LAMP2/CTSB/HSPA5/KLHL3/TBX21/LGMN/CTSS/EDEM2/ERLEC1/RHBDD3/CLU/EDEM3/KEAP1/GBA/CCDC115/VPS28/FHIT/FBXL15/TCIRG1/PSMB4/HPSE/ELOC/UBE2S/POMT2/CTSV/RCN3/CDK5RAP3/FBXL12/NFE2L2/PSMB6/UBE2J1/NPLOC4/UBE2L6/PSMB5/NOS2/SOCS6/CAPN2/ATRAID/ECRG4/ASB2/ABHD12/STX5/TRIM32/UBB/TOR1A/OS9/RNF144B/TIMP3/VCP/TMEM129/MYLIP/EFNA1/MAGEF1/LOC480667/FZR1/TRIB…
GO:0043207	response to external biotic stimulus	331	0.339188	1.45511	2.21318e-05	0.00862322	0.00803034	1556	tags=20%, list=11%, signal=18%	SLPI/LOC100687054/LTF/LOC480600/LOC611538/CAMP/CCL8/S100A12/JCHAIN/KLRK1/NR1H3/PIM2/PDCD1LG2/LGALS3/ISG20/STAB1/CEBPB/VSIG4/IFNG/PYCARD/DAPK1/RAB20/VTCN1/CCR5/CXCL16/CXCL10/PRDX2/TBX21/HCK/OAS2/KLRD1/PLAAT3/MPEG1/SMPD1/FCER1G/OASL/MYO1C/SMAD6/BCL2L1/LY96/CFI/CD96/CXCL8/IL31RA/CARD9/RARRES2/BATF2/NECTIN2/CDC42EP2/CFP/NLRC5/ABCA1/HYAL2/RAB1A/IL15/LOC479668/NPLOC4/AIF1/IL21/TENT5A/NOS2/NLRX1/FZD5/CC…
GO:0051707	response to other organism	331	0.339188	1.45511	2.21318e-05	0.00862322	0.00803034	1556	tags=20%, list=11%, signal=18%	SLPI/LOC100687054/LTF/LOC480600/LOC611538/CAMP/CCL8/S100A12/JCHAIN/KLRK1/NR1H3/PIM2/PDCD1LG2/LGALS3/ISG20/STAB1/CEBPB/VSIG4/IFNG/PYCARD/DAPK1/RAB20/VTCN1/CCR5/CXCL16/CXCL10/PRDX2/TBX21/HCK/OAS2/KLRD1/PLAAT3/MPEG1/SMPD1/FCER1G/OASL/MYO1C/SMAD6/BCL2L1/LY96/CFI/CD96/CXCL8/IL31RA/CARD9/RARRES2/BATF2/NECTIN2/CDC42EP2/CFP/NLRC5/ABCA1/HYAL2/RAB1A/IL15/LOC479668/NPLOC4/AIF1/IL21/TENT5A/NOS2/NLRX1/FZD5/CC…
GO:0044257	cellular protein catabolic process	336	0.348499	1.49358	2.26817e-05	0.00862322	0.00803034	3684	tags=36%, list=26%, signal=27%	GZMA/NUPR1/SEL1L/HSP90B1/CTSK/SEC61B/HERPUD1/CTSB/HSPA5/KLHL3/TBX21/LGMN/CTSS/EDEM2/ERLEC1/CLU/EDEM3/KEAP1/GBA/CCDC115/VPS28/FHIT/FBXL15/TCIRG1/PSMB4/ELOC/UBE2S/POMT2/CTSV/RCN3/CDK5RAP3/FBXL12/NFE2L2/PSMB6/UBE2J1/NPLOC4/UBE2L6/PSMB5/SOCS6/CAPN2/ATRAID/ECRG4/ASB2/TRIM32/UBB/TOR1A/OS9/RNF144B/VCP/TMEM129/MYLIP/EFNA1/MAGEF1/LOC480667/FZR1/TRIB1/CTSC/RMND5B/UBXN4/HTRA2/UQCC2/PCYOX1/CDC20/FBXO27/PRKN/…
GO:0006886	intracellular protein transport	388	0.330239	1.42665	2.41481e-05	0.00862322	0.00803034	3700	tags=36%, list=26%, signal=27%	RAB3D/SEC24D/SEC61A1/SEC61B/HERPUD1/SSR3/IFNG/LAMP2/RAB20/SRPRA/HSPA5/SPCS3/TMED3/TIMM17B/SEC13/PREB/SEC24A/TRAM1/SREBF1/SPCS2/EDEM2/ERLEC1/TMED9/SEC61G/TMED2/TOMM20/MYO1C/SYTL2/B3GAT3/USO1/SCARB2/TRAK1/ARF1/VPS28/CALR/COPG1/SAR1A/TOMM22/SNX17/ZDHHC12/SAMM50/HYAL2/RAB1A/BAG3/UBE2J1/STX11/AP2A1/NPLOC4/SYTL1/SEC23B/MDFIC/SRP68/TXNIP/SNX10/SEC23A/STX5/FERMT1/OS9/SAR1B/CD36/VCP/LOC102155463/SYTL3/COP…
GO:0009100	glycoprotein metabolic process	129	0.446542	1.74744	2.56949e-05	0.00862322	0.00803034	2401	tags=43%, list=17%, signal=36%	NDNF/DDOST/MOGS/ST6GALNAC2/PORCN/RPN2/SLC35C1/ST6GALNAC4/TMEM59/RPN1/STT3A/CHST12/MAGT1/EDEM2/CHST7/DCN/CHSY1/EDEM3/DPAGT1/SLC35C2/B3GAT3/B3GNT4/GANAB/NUS1/OSTC/FUT8/MGAT2/HPSE/RAB1A/FUT7/BPNT2/IL15/POMT2/CTSV/UBE2J1/NCSTN/ALG5/POMT1/AGA/B4GALT2/LOC480667/MAN1A2/GALNT2/MAN2A2/ST6GAL1/DAD1/ST6GALNAC6/KRTCAP2/CANT1/GALNT1/PRKCSH/ST3GAL1/FBXO27/GBGT1/FUT11
GO:0070972	protein localization to endoplasmic reticulum	29	0.715814	2.13568	4.22779e-05	0.0110167	0.0102593	2625	tags=59%, list=19%, signal=48%	SEC61A1/SEC61B/HERPUD1/SSR3/SRPRA/HSPA5/SPCS3/KDELR2/TRAM1/SPCS2/SEC61G/SRP68/OS9/SRP54/SRP9/SEC16A/KDELR3
GO:0009607	response to biotic stimulus	345	0.331403	1.42509	4.89027e-05	0.0110167	0.0102593	1556	tags=19%, list=11%, signal=18%	SLPI/LOC100687054/LTF/LOC480600/LOC611538/CAMP/CCL8/S100A12/JCHAIN/KLRK1/NR1H3/PIM2/PDCD1LG2/LGALS3/ISG20/STAB1/CEBPB/VSIG4/IFNG/PYCARD/DAPK1/RAB20/VTCN1/CCR5/HSPA5/CXCL16/CXCL10/PRDX2/TBX21/HCK/OAS2/KLRD1/PLAAT3/MPEG1/SMPD1/FCER1G/OASL/MYO1C/SMAD6/BCL2L1/LY96/CFI/CD96/CXCL8/IL31RA/CARD9/RARRES2/BATF2/NECTIN2/CDC42EP2/CFP/NLRC5/ABCA1/HYAL2/RAB1A/IL15/LOC479668/NPLOC4/AIF1/IL21/TENT5A/NOS2/NLRX1/T…
GO:0042149	cellular response to glucose starvation	17	0.800747	2.09297	4.98603e-05	0.0110167	0.0102593	1736	tags=47%, list=12%, signal=41%	BHLHA15/HSPA5/TBL2/NIM1K/ATF4/NFE2L2/SIK2/NUAK1
GO:0090150	establishment of protein localization to membrane	85	0.5037	1.83151	7.0275e-05	0.0121197	0.0112864	3452	tags=45%, list=24%, signal=34%	RAB26/SEC61A1/SEC61B/SSR3/SRPRA/HSPA5/EMC4/TRAM1/SEC61G/MYO1C/BLZF1/ZDHHC12/SAMM50/EMC3/SYS1/SRP68/PKDCC/GOLPH3L/SRP54/TIMM10/SRP9/BAX/CIB1/AKAP5/GORASP2/EMC6/SEC16A/TCAF1/ZDHHC24/LOC100856583/VAMP5/BCS1L/PEX19/SCRIB/GET3/SRP72/SGTA/CLN3
GO:1901565	organonitrogen compound catabolic process	492	0.29644	1.31839	8.15918e-05	0.0124465	0.0115907	3654	tags=36%, list=26%, signal=28%	CHI3L1/GZMA/XDH/NUPR1/RAB26/APOE/CDA/SEL1L/HSP90B1/CTSK/SEC61B/HERPUD1/IFNG/LAMP2/DCTPP1/CTSB/ADA2/HSPA5/ALDH1L2/PLA2G7/KLHL3/TBX21/LGMN/GLDC/CTSS/SGPL1/TPP1/HIBADH/EDEM2/IDO1/SMPD1/ERLEC1/RHBDD3/CLU/HEXA/EDEM3/COMT/KEAP1/GSTZ1/GBA/CCDC115/VPS28/FHIT/FBXL15/PLA2G4A/TCIRG1/HSD17B10/PSMB4/HPSE/HYAL2/ELOC/UBE2S/ENTPD7/POMT2/CTSV/RCN3/PDE4A/CDK5RAP3/FBXL12/NFE2L2/PSMB6/UBE2J1/NPLOC4/UBE2L6/PSMB5/NOS2…
GO:1901135	carbohydrate derivative metabolic process	338	0.336722	1.45276	8.6072e-05	0.012559	0.0116955	2317	tags=29%, list=16%, signal=25%	CHI3L1/XDH/NUPR1/NPPC/AK1/CDA/NDNF/PIGT/DDOST/SLC4A1/LOC481634/AOAH/MOGS/ST6GALNAC2/PORCN/RPN2/SLC35C1/ST6GALNAC4/IFNG/DCTPP1/GNE/ADA2/TMEM59/RPN1/ATP5PO/ATP5MC1/STT3A/NDST1/CHST12/MAGT1/MPPE1/EDEM2/CHST7/DCN/HEXA/PID1/CHSY1/EDEM3/DPAGT1/SLC35C2/B3GAT3/B3GNT4/GBA/ATP5MC3/GANAB/NUS1/OSTC/PDGFB/PDK4/APRT/FUT8/MGAT2/ALDOC/HPSE/HYAL2/RAB1A/FUT7/BPNT2/IL15/ENTPD7/POMT2/CTSV/PDE4A/ADCY2/UBE2J1/NCSTN/AL…
GO:0044419	biological process involved in interspecies interaction between organisms	406	0.312654	1.36335	0.000133803	0.0166312	0.0154877	1797	tags=19%, list=13%, signal=17%	SLPI/LOC100687054/LTF/LOC480600/LOC611538/CAMP/CCL8/S100A12/JCHAIN/KLRK1/NR1H3/PIM2/PDCD1LG2/LGALS3/ISG20/STAB1/CEBPB/VSIG4/IFNG/PYCARD/DAPK1/RAB20/VTCN1/CCR5/SPCS3/CXCL16/CXCL10/PRDX2/TBX21/HCK/OAS2/KLRD1/PLAAT3/MPEG1/SMPD1/FCER1G/OASL/TMEM39A/MYO1C/SMAD6/BCL2L1/LY96/CFI/CD96/CXCL8/IL31RA/CARD9/RARRES2/BATF2/ULK1/NECTIN2/CDC42EP2/CFP/NLRC5/ABCA1/SPCS1/HYAL2/RAB1A/IL15/LOC479668/NPLOC4/AIF1/IL21/…
GO:0006487	protein N-linked glycosylation	24	0.724553	2.09608	0.00015634	0.0174892	0.0162868	2137	tags=58%, list=15%, signal=50%	DDOST/MOGS/RPN2/RPN1/STT3A/MAGT1/DPAGT1/NUS1/FUT8/MGAT2/UBE2J1/ALG5/ST6GAL1/KRTCAP2
GO:0099537	trans-synaptic signaling	148	-0.513065	-1.65257	0.000178028	0.019273	0.0179479	1498	tags=22%, list=11%, signal=20%	EGR3/PLCL1/SV2B/NEURL1/CHRM3/CACNB2/CPLX3/OTOF/TPBG/GRIN2B/RIMS2/GRIK5/DLGAP2/SV2C/HTR2B/RAPSN/CUX2/GJD2/EPHB1/HRH4/CHRND/SYN1/CDH8/CACNG2/NPTX1/DOC2A/GRM1/CACNA1G/LRRTM2/SORCS3/ADORA1/SLC6A2
GO:0032103	positive regulation of response to external stimulus	115	0.439438	1.70386	0.000267443	0.0271982	0.0253282	1462	tags=24%, list=10%, signal=22%	MMP8/NUPR1/KLRK1/VEGFA/CEBPB/IFNG/CMKLR1/PYCARD/CCR2/C3AR1/CXCL10/CCR1/KLRD1/FCER1G/LY96/MOSPD2/CXCL8/CARD9/RARRES2/NECTIN2/P2RX4/PDGFB/CALR/NLRC5/HYAL2/MET/AIF1/IL21
GO:0035966	response to topologically incorrect protein	53	0.545841	1.83649	0.00030063	0.0280254	0.0260986	2166	tags=34%, list=15%, signal=29%	BHLHA15/ERN1/HERPUD1/ATF3/HSPA5/TBL2/HSPA13/CLU/TMED2/ATF4/BAG3/POMT2/CDK5RAP3/NFE2L2/TOR1A/VCP/CANX/BAX
GO:0043086	negative regulation of catalytic activity	159	0.38742	1.5682	0.00037364	0.0338901	0.0315601	1698	tags=22%, list=12%, signal=20%	APOC1/LTF/GZMA/DEPTOR/SFRP2/KLRK1/SLC4A1/DUSP5/SERPINI1/GCHFR/SPINK2/IFNG/PYCARD/SRC/GADD45B/DBNDD2/SMPD1/TMED2/PLAUR/NR2F2/SLC39A14/GBA/ANXA1/TRIB3/ORMDL3/HYAL2/PPP1R37/SERPINF1/CDK5RAP3/SERPINH1/ZFYVE28/SERPINB10/DUSP22/UBASH3B/APOA1/TIMP3
GO:2000377	regulation of reactive oxygen species metabolic process	45	0.573949	1.85946	0.000452126	0.0379333	0.0353253	1709	tags=31%, list=12%, signal=27%	MMP8/XDH/KLRK1/TSPO/IFNG/PRDX2/BCO2/FOXO3/PID1/PDGFB/NFE2L2/ITGAM/INSR/CD36
GO:0097006	regulation of plasma lipoprotein particle levels	16	0.7568	1.93728	0.000567383	0.0464424	0.0432493	2243	tags=62%, list=16%, signal=53%	APOC1/APOE/MSR1/ABCA1/EHD1/CNPY2/APOA1/CD36/MYLIP/NR1H2

## Sheet: positiveLog2FC_DEGs
TABLE S3. Complete results of functional enrichment analyses.
Term ID	Description	GeneRatio	BgRatio	pvalue	p.adjust	qvalue	Count	Gene IDs
GO:0006952	defense response	64/426	409/6250	9.71097e-11	2.53359e-07	2.30099e-07	64	NR1H3/MPEG1/CHI3L1/MYO1C/CCR1/SMPD1/CXCL16/JCHAIN/NUPR1/CCL5/HCK/DAPK1/ISG20/AOAH/ACOD1/LOC100687054/RAB20/RHBDD3/LOC480600/C3AR1/PYCARD/CCR5/IL1RN/KLRK1/OASL/LGALS3/CSF1R/LTF/CCR2/CASP4/VSIG4/CXCR6/SLPI/CAMP/ANXA1/FCER1G/CEBPB/STAB1/CMKLR1/CCRL2/OAS2/CXCL10/LOC611538/CARD9/LOC111089962/LY96/PRDX2/CFI/NECTIN2/TREM1/CXCR3/CCL8/RARRES2/PTAFR/CD96/S100A12/MMP8/OLR1/ELANE/KLRD1/BATF2/IFNG/CD163/LOC40…
GO:0006959	humoral immune response	14/426	40/6250	1.69993e-07	0.000221756	0.000201397	14	C1QB/JCHAIN/C1QA/LOC100687054/LTF/CCR2/VSIG4/SLPI/CAMP/CXCL10/CFI/RARRES2/S100A12/IFNG
GO:0045047	protein targeting to ER	10/426	21/6250	3.48002e-07	0.000268358	0.00024372	10	SEC61A1/HERPUD1/SRPRA/SSR3/SEC61B/HSPA5/TRAM1/SEC61G/SPCS2/SPCS3
GO:0071674	mononuclear cell migration	16/426	55/6250	4.11434e-07	0.000268358	0.00024372	16	CCR1/CXCL16/LOC480600/C3AR1/PYCARD/KLRK1/GBA/TBX21/CCR2/MOSPD2/ANXA1/CMKLR1/CXCL10/PDGFB/CCL8/RARRES2
GO:0072599	establishment of protein localization to endoplasmic reticulum	10/426	22/6250	5.99515e-07	0.000312827	0.000284107	10	SEC61A1/HERPUD1/SRPRA/SSR3/SEC61B/HSPA5/TRAM1/SEC61G/SPCS2/SPCS3
GO:0042742	defense response to bacterium	14/426	51/6250	4.72099e-06	0.00111973	0.00101693	14	MPEG1/JCHAIN/LOC100687054/PYCARD/KLRK1/LTF/SLPI/CAMP/FCER1G/CEBPB/STAB1/LOC611538/CARD9/RARRES2
GO:1901135	carbohydrate derivative metabolic process	46/426	349/6250	8.22873e-06	0.00159534	0.00144888	46	DDOST/ADA2/XDH/PIGT/CHI3L1/ST6GALNAC4/TMEM59/MOGS/RPN2/NUPR1/EDEM2/HEXA/GNE/AOAH/AK1/SLC35C2/GANAB/B3GAT3/MPPE1/MAGT1/NDST1/CHSY1/SLC35C1/PORCN/GBA/RPN1/ATP5PO/ATP5MC1/NDNF/STT3A/DPAGT1/DCTPP1/ATP5MC3/NUS1/CHST12/EDEM3/PID1/LOC481634/CHST7/PDGFB/CDA/ST6GALNAC2/OSTC/B3GNT4/NPPC/IFNG
GO:0009100	glycoprotein metabolic process	24/426	133/6250	8.39834e-06	0.00159534	0.00144888	24	DDOST/ST6GALNAC4/TMEM59/MOGS/RPN2/EDEM2/SLC35C2/GANAB/B3GAT3/MAGT1/CHSY1/SLC35C1/PORCN/RPN1/NDNF/STT3A/DPAGT1/NUS1/CHST12/EDEM3/CHST7/ST6GALNAC2/OSTC/B3GNT4
GO:0043207	response to external biotic stimulus	45/426	340/6250	9.31569e-06	0.00159534	0.00144888	45	NR1H3/MPEG1/PDCD1LG2/MYO1C/SMPD1/CXCL16/JCHAIN/PIM2/HCK/DAPK1/ISG20/LOC100687054/RAB20/LOC480600/PYCARD/CCR5/KLRK1/OASL/LGALS3/LTF/TBX21/VSIG4/SLPI/PLAAT3/CAMP/FCER1G/CEBPB/BCL2L1/STAB1/OAS2/CXCL10/LOC611538/CARD9/LY96/PRDX2/CFI/NECTIN2/CCL8/RARRES2/CD96/S100A12/KLRD1/VTCN1/BATF2/IFNG
GO:0002548	monocyte chemotaxis	8/426	18/6250	1.03951e-05	0.00159534	0.00144888	8	CCR1/LOC480600/CCR2/MOSPD2/ANXA1/CXCL10/PDGFB/CCL8
GO:0030574	collagen catabolic process	6/426	11/6250	3.33318e-05	0.0039793	0.00361397	6	MMP14/MMP19/CTSK/MMP11/MMP8/MMP9
GO:0032103	positive regulation of response to external stimulus	21/426	117/6250	3.35549e-05	0.0039793	0.00361397	21	VEGFA/CCR1/NUPR1/C3AR1/PYCARD/KLRK1/CCR2/MOSPD2/FCER1G/CEBPB/CMKLR1/CXCL10/CARD9/LY96/P2RX4/NECTIN2/PDGFB/RARRES2/MMP8/KLRD1/IFNG
GO:0006888	endoplasmic reticulum to Golgi vesicle-mediated transport	15/426	69/6250	4.62844e-05	0.00488157	0.00443341	15	TMED3/ERGIC3/YIF1B/COPE/SEC24D/PREB/LMAN1/LMAN2/MPPE1/YIF1A/SEC13/TMED9/USO1/SEC24A/TMED2
GO:1901137	carbohydrate derivative biosynthetic process	30/426	208/6250	6.32567e-05	0.00634756	0.00576481	30	DDOST/ADA2/PIGT/ST6GALNAC4/TMEM59/MOGS/RPN2/AK1/SLC35C2/B3GAT3/MPPE1/MAGT1/NDST1/CHSY1/SLC35C1/RPN1/ATP5PO/ATP5MC1/STT3A/DPAGT1/ATP5MC3/NUS1/CHST12/PID1/CHST7/PDGFB/ST6GALNAC2/OSTC/B3GNT4/NPPC
GO:0019730	antimicrobial humoral response	7/426	17/6250	6.94636e-05	0.00671224	0.00609601	7	JCHAIN/LTF/SLPI/CAMP/CXCL10/RARRES2/S100A12
GO:0070085	glycosylation	17/426	88/6250	7.25013e-05	0.00675557	0.00613535	17	DDOST/ST6GALNAC4/TMEM59/MOGS/RPN2/SLC35C2/B3GAT3/MAGT1/SLC35C1/GBA/RPN1/STT3A/DPAGT1/NUS1/ST6GALNAC2/OSTC/B3GNT4
GO:0002685	regulation of leukocyte migration	14/426	64/6250	7.69699e-05	0.00692464	0.0062889	14	EMILIN1/VEGFA/CCR1/MMP14/C3AR1/PYCARD/KLRK1/CCR2/MOSPD2/ANXA1/CMKLR1/CXCL10/CXCR3/RARRES2
GO:0009101	glycoprotein biosynthetic process	19/426	106/6250	8.07714e-05	0.00702442	0.00637952	19	DDOST/ST6GALNAC4/TMEM59/MOGS/RPN2/SLC35C2/B3GAT3/MAGT1/CHSY1/SLC35C1/RPN1/STT3A/DPAGT1/NUS1/CHST12/CHST7/ST6GALNAC2/OSTC/B3GNT4
GO:0050866	negative regulation of cell activation	14/426	67/6250	0.000130318	0.01	0.00908193	14	NR1H3/SDC4/EMILIN1/PDCD1LG2/RHBDD3/MERTK/TBX21/CCR2/VSIG4/ANXA1/CEBPB/PRDX2/PDGFB/VTCN1
GO:0043413	macromolecule glycosylation	16/426	84/6250	0.000140316	0.010169	0.00923539	16	DDOST/ST6GALNAC4/TMEM59/MOGS/RPN2/SLC35C2/B3GAT3/MAGT1/SLC35C1/RPN1/STT3A/DPAGT1/NUS1/ST6GALNAC2/OSTC/B3GNT4
GO:0044419	biological process involved in interspecies interaction between organisms	48/426	415/6250	0.000159292	0.0112322	0.010201	48	NR1H3/MPEG1/PDCD1LG2/MYO1C/SMPD1/CXCL16/JCHAIN/ULK1/PIM2/HCK/DAPK1/ISG20/LOC100687054/RAB20/LOC480600/PYCARD/CCR5/KLRK1/OASL/LGALS3/TMEM39A/LTF/TBX21/VSIG4/SPCS3/SLPI/PLAAT3/CAMP/FCER1G/CEBPB/BCL2L1/STAB1/OAS2/CXCL10/LOC611538/CARD9/LY96/PRDX2/CFI/NECTIN2/CCL8/RARRES2/CD96/S100A12/KLRD1/VTCN1/BATF2/IFNG
GO:0032963	collagen metabolic process	8/426	25/6250	0.000167886	0.0115267	0.0104685	8	EMILIN1/MMP14/MMP19/CTSK/P3H4/MMP11/MMP8/MMP9
GO:0006812	cation transport	34/426	262/6250	0.000178553	0.0119447	0.0108481	34	BHLHA15/SLC1A4/CD63/TSPAN13/CCR1/SLC11A1/PIK3CG/LOC403631/DAPK1/SLC43A1/CCR5/KLHL3/SLC23A1/SLC41A2/LTF/ATP5PO/SLC6A9/ATP5MC1/SLC39A7/FTH1/TCN2/ATP5MC3/SLC30A7/KCNA2/STEAP3/FCER1G/SLC39A14/CXCL10/P2RX4/PDGFB/KCNJ2/CCL8/FHL1/KCNE3
GO:0034976	response to endoplasmic reticulum stress	19/426	113/6250	0.000195231	0.0127339	0.0115649	19	BHLHA15/NR1H3/ERN1/SEL1L/P4HB/NUPR1/HERPUD1/EDEM2/PDIA4/SEC61B/TBL2/HSP90B1/HSPA5/ERLEC1/PDIA3/TMED2/CEBPB/ATF3/EDEM3
GO:0006022	aminoglycan metabolic process	10/426	40/6250	0.00025779	0.0160137	0.0145435	10	CHI3L1/HEXA/B3GAT3/NDST1/CHSY1/NDNF/CHST12/CHST7/PDGFB/B3GNT4
GO:0034220	ion transmembrane transport	37/426	300/6250	0.000264708	0.016061	0.0145865	37	BHLHA15/SLC1A4/CD63/CLIC4/TSPAN13/SEC61A1/SLC38A10/LOC609612/PIK3CG/DAPK1/SEC61B/SLC35C2/TOMM20/SLC43A1/CCR5/TIMM17B/SLC35C1/SLC23A1/HSPA5/TRAM1/ATP5PO/SLC6A9/SLC35B1/ATP5MC1/SLC39A7/SEC61G/TCN2/ATP5MC3/KCNA2/SLC39A14/CXCL10/PID1/SLC46A1/KCNJ2/FHL1/KCNE3/SCN3B
GO:0001775	cell activation	37/426	308/6250	0.000446502	0.0236147	0.0214467	37	MZB1/NR1H3/SDC4/EMILIN1/PRDM1/PDCD1LG2/LOC100687054/MMP14/RHBDD3/PYCARD/SIRPA/MERTK/KLRK1/GBA/ITGB3/TBX21/CCR2/LTBR/VSIG4/DYSF/EOMES/ANXA1/FCER1G/CEBPB/SLA2/CXCL10/LOC611538/PRDX2/IGF2/NECTIN2/PDGFB/KLF5/MMP8/VTCN1/BATF2/P2RY1/IFNG
GO:0006909	phagocytosis	14/426	75/6250	0.000451659	0.0236147	0.0214467	14	TXNDC5/LOC100687054/ITGB2/RAB20/PYCARD/SIRPA/LMAN2/MERTK/NCF2/CCR2/DYSF/ANXA1/FCER1G/ELANE
GO:0048193	Golgi vesicle transport	20/426	130/6250	0.000453438	0.0236147	0.0214467	20	TMEM115/TMED3/ERGIC3/YIF1B/COPE/SEC24D/PREB/LMAN1/LMAN2/MPPE1/YIF1A/KDELR2/SEC13/NBAS/TMED9/BLZF1/USO1/SEC24A/RAB26/TMED2
GO:0002695	negative regulation of leukocyte activation	12/426	59/6250	0.000509044	0.0250584	0.0227578	12	NR1H3/SDC4/PDCD1LG2/RHBDD3/MERTK/TBX21/CCR2/VSIG4/ANXA1/CEBPB/PRDX2/VTCN1
GO:0050921	positive regulation of chemotaxis	10/426	44/6250	0.000589931	0.0274844	0.0249612	10	VEGFA/CCR1/C3AR1/CCR2/MOSPD2/CMKLR1/CXCL10/P2RX4/PDGFB/RARRES2
GO:0051272	positive regulation of cellular component movement	24/426	175/6250	0.00072391	0.0328873	0.029868	24	DOCK5/MYO1C/VEGFA/CCR1/PIK3CG/CXCL16/MMP14/C3AR1/PYCARD/SRC/HSPA5/NSMF/CCR2/MOSPD2/ANXA1/NUS1/CMKLR1/RRAS/CXCL10/P2RX4/PDGFB/RARRES2/IFNG/TRIP6
GO:0006956	complement activation	5/426	12/6250	0.000761966	0.0328873	0.029868	5	C1QB/C1QA/LOC100687054/VSIG4/CFI
GO:0000041	transition metal ion transport	9/426	38/6250	0.000803194	0.0328873	0.029868	9	SLC11A1/LOC403631/LTF/SLC39A7/FTH1/TCN2/SLC30A7/STEAP3/SLC39A14
GO:0035924	cellular response to vascular endothelial growth factor stimulus	7/426	24/6250	0.000813529	0.0328873	0.029868	7	ERN1/CD63/XDH/MYO1C/VEGFA/ANXA1/NUS1
GO:2000379	positive regulation of reactive oxygen species metabolic process	7/426	24/6250	0.000813529	0.0328873	0.029868	7	XDH/TSPO/KLRK1/PID1/PDGFB/MMP8/IFNG
GO:0002690	positive regulation of leukocyte chemotaxis	8/426	31/6250	0.000851933	0.0328873	0.029868	8	VEGFA/CCR1/C3AR1/CCR2/MOSPD2/CMKLR1/CXCL10/RARRES2
GO:0072593	reactive oxygen species metabolic process	13/426	72/6250	0.000994786	0.0370771	0.0336731	13	XDH/FOXO3/BCO2/TSPO/SPR/KLRK1/NCF2/LOC100855540/PRDX2/PID1/PDGFB/MMP8/IFNG
GO:0002274	myeloid leukocyte activation	11/426	56/6250	0.00117474	0.0414174	0.0376149	11	NR1H3/PYCARD/CCR2/LTBR/VSIG4/DYSF/FCER1G/NECTIN2/MMP8/BATF2/IFNG
GO:0006935	chemotaxis	24/426	183/6250	0.00137004	0.0447687	0.0406586	24	VEGFA/CCR1/CXCL16/LOC480600/C3AR1/LAMA3/CCR5/KLRK1/CCR2/CXCR6/MOSPD2/ANXA1/FCER1G/CMKLR1/CCRL2/CXCL10/P2RX4/PDGFB/NRCAM/CXCR3/CCL8/RARRES2/PTAFR/CSF3R
GO:0006023	aminoglycan biosynthetic process	7/426	26/6250	0.00137275	0.0447687	0.0406586	7	B3GAT3/NDST1/CHSY1/CHST12/CHST7/PDGFB/B3GNT4

## Sheet: negativeLog2FC_DEGs
TABLE S3. Complete results of functional enrichment analyses.
Term ID	Description	GeneRatio	BgRatio	pvalue	p.adjust	qvalue	Count	Gene IDs
GO:0007267	cell-cell signaling	54/432	371/6250	7.40546e-08	0.000185285	0.000178511	54	LGR6/CCKAR/SOX30/CACNA1G/ADORA1/EGR1/CUX2/DOC2A/APCDD1L/LRRTM2/SYN1/ANKRD6/SLC6A2/PLCL1/SORCS3/HRH4/WNT9B/DDIT3/PAX8/NPTX1/HTR2B/RIMS2/RAPSN/CHRND/ABCC4/GRM1/DKKL1/CFTR/GJD2/GRIN2B/FZD3/CDH8/FGFR2/CPLX3/SV2C/WNT2/TFR2/TRABD2A/EGR3/CACNB2/EPHB1/KCNJ5/DLGAP2/ZNRF3/CCN3/CACNG2/PTK7/RSPO1/SYT3/SOX9/ADCY5/GRIK5/NEURL1/FZD9
GO:0003008	system process	50/432	359/6250	9.36116e-07	0.000468432	0.000451306	50	LMOD3/FXN/PLS1/MYLK3/MYOM3/PDE1B/ACE2/CACNA1G/ADORA1/CUX2/NOB1/SERPINF2/TRPC3/TNNI3K/SLC4A3/SORCS3/KCNH2/LVRN/STAC/SHOX2/DDIT3/LRIT3/NPTX1/TBC1D8B/OPRK1/CNGB1/HTR2B/CHRND/CNGB3/GRM1/TRDN/EDNRB/ACP3/GJD2/SRL/GRIN2B/GPR179/LHFPL4/EPHB1/KCNJ5/NOS3/CACNG2/ABCA4/TRPM3/SOX9/IGDCC3/GRIK5/HOXB8/FZD9/KCNMB3
GO:0098742	cell-cell adhesion via plasma-membrane adhesion molecules	14/432	55/6250	1.44931e-05	0.00453272	0.004367	14	CDH16/LRFN4/SELP/LOC487173/RET/CRTAM/TENM1/CDH8/CDH24/FAT3/LOC485469/GPC6/CDHR2/IGDCC3
GO:0035082	axoneme assembly	8/432	21/6250	4.45551e-05	0.0123863	0.0119335	8	DNAH17/DNAJB13/DNAH7/ARMC2/DNAAF4/FSIP2/FOXJ1/NEURL1
GO:0055085	transmembrane transport	42/432	330/6250	6.72902e-05	0.016836	0.0162205	42	SLC25A40/ACE2/CRBN/CACNA1G/KCNG3/TRPC3/ABCD4/SLC4A3/SLC6A2/SLC38A3/KCNH2/KCNC2/STAC/DDIT3/LOC489640/ATP1A4/HTR2B/DPP6/SCN5A/SLC17A3/CHRND/ABCC4/GRM1/SLC6A17/TRDN/CFTR/KCNJ3/GRIN2B/ABCD2/CACNA1D/CACNB2/ATP6/KCNJ5/SLC25A21/CACNG2/ABCC8/SCN8A/ND5/TRPM3/CLTCL1/ND4/SLC9A5
GO:0035637	multicellular organismal signaling	9/432	30/6250	0.000128037	0.0266957	0.0257197	9	ACE2/CACNA1G/TNNI3K/SLC4A3/KCNH2/TRDN/KCNJ5/CACNG2/KCNMB3

## Sheet: module_blue4
TABLE S3. Complete results of functional enrichment analyses.
Term ID	Description	GeneRatio	BgRatio	pvalue	p.adjust	qvalue	Count	Gene IDs
GO:1903047	mitotic cell cycle process	142/1781	298/7709	2.26447e-21	3.77379e-18	3.54695e-18	142	CDK2/FBXO5/TAF2/DSCC1/CDC23/CDC25C/CUL7/CUL9/MAD2L1BP/VCP/PKHD1/CKS2/MSH2/SMC2/TTK/ANLN/CDCA8/EZH2/CLSPN/CASP2/ORC1/GEN1/CCNA2/MRE11/CENPA/CLASP1/BORA/MCM6/CDC20/SPRY2/KAT14/RPTOR/E2F7/ANAPC15/CKAP2/PCNA/CUL4A/BRCA2/TFDP1/TOPBP1/DCTN6/NCAPH/MCM4/WDR62/RAN/ESPL1/TPX2/ANAPC1/KIF20B/KIF3B/FAM107A/RRS1/CENPK/CCNB1/RIOK2/RACGAP1/PLRG1/ANAPC7/CCNJ/ADAMTS1/DSN1/USP16/BUB1B/CKAP5/KNSTRN/RAD51/ZFYVE19/UBE…
GO:0000278	mitotic cell cycle	164/1781	364/7709	2.349e-21	3.77379e-18	3.54695e-18	164	CDK2/TUBB/FBXO5/TAF2/DSCC1/CDC23/CDC25C/CUL7/CUL9/MAD2L1BP/VCP/PKHD1/CKS2/MSH2/SMC2/TTK/ANLN/CDCA8/EZH2/CLSPN/CASP2/ORC1/GEN1/PLK4/TUBE1/CCNA2/MRE11/NUDT15/CENPA/DDIAS/CLASP1/XRCC2/BORA/MCM6/CDC20/SPRY2/KAT14/AZI2/RPTOR/E2F7/ANAPC15/CKAP2/PCNA/CUL4A/BRCA2/TFDP1/TOPBP1/DCTN6/NCAPH/MCM4/WDR62/RAN/ESPL1/TPX2/ANAPC1/KIF20B/KIF3B/FAM107A/RRS1/CENPK/WEE1/CCNB1/RIOK2/RACGAP1/PLRG1/ANAPC7/CCNJ/ADAMTS1/DS…
GO:0022402	cell cycle process	207/1781	500/7709	3.14133e-21	3.77379e-18	3.54695e-18	207	RTTN/CDK2/MDM2/FBXO5/EHMT2/TAF2/DSCC1/CDC23/CDC25C/HAUS6/MYH9/ZNF16/CUL7/CUL9/MAD2L1BP/DCTN3/VCP/ECRG4/PKHD1/CKS2/MSH2/SMC2/MEI4/TTK/XPO1/ANLN/CDCA8/EZH2/CLSPN/CASP2/ORC1/GEN1/PLK4/CCNA2/MRE11/RAD54L/SOX9/CENPA/DDIAS/MAPRE3/CLASP1/MLH1/PPM1G/XRCC2/BORA/PAXIP1/MCM6/CDC20/SPRY2/KAT14/RPTOR/E2F7/ANAPC15/CKAP2/PCNA/CDC25B/CUL4A/BRCA2/TFDP1/TOPBP1/PSMD13/DCTN6/NCAPH/MCM4/WDR62/RAN/ESPL1/TPX2/ANAPC1/KI…
GO:0000070	mitotic sister chromatid segregation	52/1781	84/7709	2.35045e-14	2.11775e-11	1.99046e-11	52	FBXO5/DSCC1/CDC23/MAD2L1BP/SMC2/TTK/CDCA8/GEN1/CDC20/ANAPC15/NCAPH/RAN/ESPL1/ANAPC1/RRS1/CENPK/CCNB1/RIOK2/RACGAP1/ANAPC7/DSN1/BUB1B/KNSTRN/UBE2C/NCAPD3/KIF18A/TRIP13/SGO2/KIF14/NEK2/NUDC/NSL1/NUF2/ZW10/KIF18B/CDCA5/TUBG1/LOC100856176/NCAPD2/ZWINT/PDS5A/CDC6/KIF4A/KIF22/AURKB/PTTG1/LCMT1/PLK1/NDC80/PSMG2/HASPIN/CDC26
GO:0000819	sister chromatid segregation	57/1781	97/7709	3.4569e-14	2.49174e-11	2.34196e-11	57	FBXO5/DSCC1/CDC23/MAD2L1BP/SMC2/TTK/CDCA8/GEN1/MRE11/CDC20/ANAPC15/NCAPH/RAN/ESPL1/ANAPC1/RRS1/CENPK/CCNB1/RIOK2/RACGAP1/ANAPC7/DSN1/BUB1B/KNSTRN/UBE2C/NCAPD3/KIF18A/TRIP13/SGO2/KIF14/NEK2/NUDC/NSL1/NUF2/ZW10/KIF18B/CDCA5/TUBG1/LOC100856176/NCAPD2/ZWINT/DDX11/PDS5A/CDC6/KIF4A/KIF22/AURKB/PTTG1/LCMT1/PLK1/NDC80/STAG2/PSMG2/RMI2/HASPIN/FEN1/CDC26
GO:0007059	chromosome segregation	74/1781	148/7709	5.40483e-13	2.79829e-10	2.63009e-10	74	FBXO5/EHMT2/DSCC1/CDC23/MAD2L1BP/SMC2/PPP2R1A/MEI4/TTK/CDCA8/GEN1/MRE11/MLH1/CDC20/RAD18/ANAPC15/NCAPH/RAN/CIAO1/ESPL1/ANAPC1/RRS1/CENPK/CCNB1/RIOK2/RACGAP1/ANAPC7/DSN1/BUB1B/MIS18A/KNSTRN/UBE2C/NCAPD3/KIF18A/TRIP13/SGO2/KIF14/SPC25/NEK2/NUDC/NSL1/TLK2/NUF2/SKA1/ZW10/KIF18B/CDCA5/FANCM/BRCA1/TUBG1/LOC100856176/DLGAP5/NCAPD2/ZWINT/DDX11/PDS5A/CDC6/KIF4A/KIF22/AURKB/EME1/PTTG1/LCMT1/PLK1/TOP3A/NDC8…
GO:0051276	chromosome organization	176/1781	472/7709	5.43509e-13	2.79829e-10	2.63009e-10	176	NUP107/YEATS4/FBXO5/UBR5/EHMT2/BRD2/DSCC1/ATAD2/XRCC6/MYC/CDC23/HMGA1/KDM3B/BRPF3/MAD2L1BP/PHF2/XPA/MSH2/SMC2/MEI4/RAD23B/TTK/CCT4/MAP3K7/CDCA8/EZH2/GEN1/RUVBL2/GRWD1/CENPO/RUVBL1/CCNA2/MRE11/SOX9/CENPA/MLH1/PAXIP1/MCM6/CDC20/TADA3/FBL/KAT14/ANAPC15/PCNA/NR3C1/BRCA2/NCAPH/HMGB1/MCM4/RAN/ESPL1/ANAPC1/PCGF5/RRS1/CENPK/HCFC2/SMARCA5/CHD1/CCNB1/RIOK2/CGGBP1/HMGB2/HELLS/ACTR8/RACGAP1/PHF20/ANAPC7/DSN1…
GO:0006259	DNA metabolic process	140/1781	354/7709	1.02028e-12	4.59637e-10	4.32009e-10	140	CDK2/UBR5/EHMT2/DSCC1/MCM9/XRCC6/MYC/POLH/VCP/FANCG/XPA/MSH2/MEI4/RAD23B/CCT4/CYREN/EEPD1/EZH2/ASCC3/ORC1/GEN1/RUVBL2/RUVBL1/MRE11/RAD54L/NUDT15/MLH1/XRCC2/PAXIP1/MCM6/XRN2/RBM17/FBH1/TK1/POLB/ORC4/RAD18/PCNA/AP5S1/RFC3/CUL4A/BRCA2/TFDP1/TOPBP1/HMGB1/MCM4/POLR2I/ERI1/PARPBP/PARP4/CEBPG/TDG/HMGB2/HELLS/ACTR8/MND1/NEIL3/XRCC4/MIS18A/HELQ/RAD54B/RAD51/PMS1/RFC5/POLL/CCT5/TEX264/NUCKS1/STN1/TERT/TRIP…
GO:0000280	nuclear division	87/1781	192/7709	5.57721e-12	2.23336e-09	2.09912e-09	87	FBXO5/EHMT2/DSCC1/CDC23/CUL7/CUL9/MAD2L1BP/CKS2/SMC2/MEI4/TTK/CDCA8/GEN1/MRE11/RAD54L/CLASP1/MLH1/BORA/CDC20/ANAPC15/BRCA2/PSMD13/NCAPH/RAN/ESPL1/TPX2/ANAPC1/KIF20B/KIF3B/RRS1/CENPK/CCNB1/RIOK2/MND1/RACGAP1/ANAPC7/DSN1/USP16/BUB1B/KNSTRN/RAD54B/RAD51/UBE2C/NCAPD3/KIF18A/TRIP13/SGO2/KIF14/ASPM/NEK2/NUDC/NSL1/CEP85/TDRKH/NUF2/ZW10/KIF18B/CDCA5/FANCM/TUBG1/LOC100856176/NCAPD2/ZWINT/PDS5A/HSPA2/CDC6/…
GO:0140014	mitotic nuclear division	67/1781	134/7709	6.90378e-12	2.48812e-09	2.33856e-09	67	FBXO5/DSCC1/CDC23/CUL7/CUL9/MAD2L1BP/SMC2/TTK/CDCA8/GEN1/CLASP1/BORA/CDC20/ANAPC15/NCAPH/RAN/ESPL1/TPX2/ANAPC1/KIF20B/KIF3B/RRS1/CENPK/CCNB1/RIOK2/RACGAP1/ANAPC7/DSN1/USP16/BUB1B/KNSTRN/UBE2C/NCAPD3/KIF18A/TRIP13/SGO2/KIF14/NEK2/NUDC/NSL1/CEP85/NUF2/ZW10/KIF18B/CDCA5/TUBG1/LOC100856176/NCAPD2/ZWINT/PDS5A/CDC6/KIF4A/KIF22/AURKB/PTTG1/TOM1L1/LCMT1/PLK1/INSR/NDC80/STAG2/PSMG2/HASPIN/AURKA/UBE2S/CDC2…
GO:0006974	cellular response to DNA damage stimulus	129/1781	329/7709	1.70047e-11	5.57136e-09	5.23647e-09	129	ARMT1/DDX39B/FBXO5/UBR5/MCM9/XRCC6/MYC/HNRNPK/POLH/VCP/FANCG/XPA/MSH2/RAD23B/CYREN/EEPD1/TRIM32/CLSPN/ASCC3/CASP2/GEN1/FOXO3/RUVBL2/RUVBL1/MRE11/RAD54L/DDIAS/MLH1/XRCC2/KIN/PAXIP1/MCM6/RBM17/FBH1/POLB/RAD18/E2F7/PCNA/AP5S1/RFC3/CUL4A/BRCA2/TOPBP1/HMGB1/MCM4/POLR2I/MTREX/BCL2L1/PARPBP/CEBPG/TDG/NCOA6/ACTR8/NEIL3/USP16/XRCC4/SPRED1/PTPN11/HELQ/RAD54B/RAD51/PMS1/RFC5/POLL/TEX264/NUCKS1/CCND1/TRIP13/…
GO:0051726	regulation of cell cycle	148/1781	393/7709	1.90489e-11	5.72102e-09	5.37713e-09	148	CDK2/TNFAIP3/CDK4/MDM2/DDX39B/FBXO5/CLIC1/CDC23/CDC25C/ZNF16/CUL7/CUL9/MAD2L1BP/PKHD1/CKS2/MSH2/TTK/XPO1/EZH2/TRIM32/CLSPN/CASP2/ORC1/GEN1/PLK4/CCNA2/MRE11/SOX9/DDIAS/MAPRE3/PPM1G/BORA/PAXIP1/CDC20/RPTOR/E2F7/ANAPC15/CDC25B/CUL4A/BRCA2/TFDP1/TOPBP1/CSNK2A1/TPX2/ANAPC1/KIF20B/FAM107A/COPS5/CENPJ/CCNB1/TFDP2/RIOK2/RACGAP1/CCNH/PLRG1/ANAPC7/CCNJ/ADAMTS1/USP16/TRIM35/BUB1B/PTPN11/KNSTRN/ZFYVE19/TP53I…
GO:0048285	organelle fission	93/1781	215/7709	2.60237e-11	7.21457e-09	6.78091e-09	93	MTFR2/FBXO5/EHMT2/DSCC1/CDC23/CUL7/CUL9/MAD2L1BP/CKS2/SMC2/MEI4/TTK/CDCA8/GEN1/MRE11/RAD54L/TMEM135/CLASP1/MLH1/BORA/CDC20/ANAPC15/BRCA2/PSMD13/NCAPH/RAN/ESPL1/TPX2/ANAPC1/KIF20B/KIF3B/RRS1/CENPK/MARCHF5/CCNB1/RIOK2/MND1/RACGAP1/ANAPC7/DSN1/USP16/BUB1B/KNSTRN/RAD54B/RAD51/UBE2C/NCAPD3/KIF18A/TRIP13/SGO2/KIF14/ASPM/NEK2/NUDC/NSL1/PEX19/CEP85/MTFR1L/TDRKH/NUF2/ZW10/KIF18B/CDCA5/FANCM/TUBG1/LOC10085…
GO:0006888	endoplasmic reticulum to Golgi vesicle-mediated transport	42/1781	70/7709	3.26832e-11	8.41358e-09	7.90785e-09	42	LMAN1/TMED9/SEC24A/STX17/RAB1A/COPG1/COG3/PREB/SEC13/SEC23B/YIF1B/YIPF5/TMED2/COPB2/TRAPPC11/ERGIC3/COPB1/USO1/SEC31A/ERGIC2/SEC24B/SORL1/SEC23IP/SEC24D/ARCN1/SCFD1/GOSR2/ZW10/SEC23A/MIA2/SAR1A/SEC24C/STX5/LMAN2/TRAPPC1/TRAPPC8/STEEP1/VAPA/SEC16A/TMED5/YIF1A/SAR1B
GO:0098813	nuclear chromosome segregation	62/1781	124/7709	4.24346e-11	1.01956e-08	9.58278e-09	62	FBXO5/EHMT2/DSCC1/CDC23/MAD2L1BP/SMC2/MEI4/TTK/CDCA8/GEN1/MRE11/MLH1/CDC20/ANAPC15/NCAPH/RAN/ESPL1/ANAPC1/RRS1/CENPK/CCNB1/RIOK2/RACGAP1/ANAPC7/DSN1/BUB1B/KNSTRN/UBE2C/NCAPD3/KIF18A/TRIP13/SGO2/KIF14/NEK2/NUDC/NSL1/NUF2/ZW10/KIF18B/CDCA5/FANCM/TUBG1/LOC100856176/NCAPD2/ZWINT/DDX11/PDS5A/CDC6/KIF4A/KIF22/AURKB/EME1/PTTG1/LCMT1/PLK1/NDC80/STAG2/PSMG2/RMI2/HASPIN/FEN1/CDC26
GO:0022613	ribonucleoprotein complex biogenesis	90/1781	208/7709	5.38269e-11	1.21245e-08	1.13957e-08	90	LTV1/DDX39B/DCAF13/UTP23/SNRPC/PUF60/BYSL/RPL7L1/RRP36/NOL6/NOL8/RPS5/PRPF31/XPO1/UTP11/LUC7L2/RUVBL1/POLR2D/MRPS7/CLNS1A/DDX18/CELF2/WDR43/CRNKL1/FBL/CUL4A/SHQ1/NOP56/RAN/ERI1/MTREX/UTP20/BMS1/RRS1/EIF3M/WDR36/EIF2S2/ABCE1/RIOK2/SMN/NSA2/RPL6/URB1/HELQ/SCAF11/WDR75/WDR3/HEATR3/EIF2D/RRP1B/RRP1/SBDS/HEATR1/PRMT5/NGDN/NOP58/MTG2/FTSJ3/RAMAC/NSUN5/DHX9/SNRPD3/NOP14/LSM4/NOP2/WDR74/NUP88/LYAR/PRPF19…
GO:0006281	DNA repair	90/1781	210/7709	1.00269e-10	2.1257e-08	1.99793e-08	90	UBR5/MCM9/XRCC6/POLH/VCP/FANCG/XPA/MSH2/RAD23B/CYREN/EEPD1/ASCC3/GEN1/RUVBL2/RUVBL1/MRE11/RAD54L/MLH1/XRCC2/MCM6/RBM17/FBH1/POLB/RAD18/PCNA/AP5S1/RFC3/CUL4A/BRCA2/HMGB1/MCM4/POLR2I/PARPBP/CEBPG/TDG/ACTR8/NEIL3/XRCC4/HELQ/RAD54B/RAD51/PMS1/RFC5/POLL/TEX264/NUCKS1/TRIP13/FANCI/SPRTN/HINFP/DTL/H2AX/DHX9/KDM1A/SETD2/RFC4/FANCM/BRCA1/RHNO1/MNAT1/FOXM1/EXO1/RAD52/PDS5A/AP5Z1/NUDT1/PRPF19/ZFYVE26/TP53/E…
GO:0034660	ncRNA metabolic process	92/1781	217/7709	1.25423e-10	2.51125e-08	2.3603e-08	92	NARS1/MARS1/POP1/VARS1/DCAF13/UTP23/C1H9orf64/EXOSC4/BYSL/RPL7L1/RRP36/NOL6/NOL8/MTO1/HNRNPA2B1/UTP11/DDX1/PUS7/DDX18/DIS3/DARS1/WDR43/FBL/THUMPD3/DPH3/HARS1/LARS1/SHQ1/THUMPD2/ERI1/MTREX/UTP20/BMS1/RRS1/WDR36/RIOK2/XRN1/NSA2/URB1/HELQ/WDR75/EXD1/WDR3/CARS1/NSUN2/RRP1B/RRP1/SBDS/EPRS1/HEATR1/IARS2/NGDN/SSB/FTSJ3/TDRKH/NSUN5/RELA/PRORP/POP7/NOP14/ZSWIM8/NOP2/WDR74/LYAR/INTS5/FARSB/MRPL44/HSD17B10/…
GO:0044772	mitotic cell cycle phase transition	72/1781	161/7709	8.02711e-10	1.52262e-07	1.43109e-07	72	CDK2/FBXO5/TAF2/CDC23/CDC25C/MAD2L1BP/CKS2/TTK/EZH2/CLSPN/CASP2/ORC1/GEN1/CCNA2/MRE11/KAT14/RPTOR/E2F7/ANAPC15/CUL4A/TFDP1/TOPBP1/ANAPC1/FAM107A/CCNB1/RIOK2/PLRG1/ANAPC7/CCNJ/ADAMTS1/BUB1B/ZFYVE19/UBE2C/CCND1/TRIP13/KIF14/TICRR/HINFP/DTL/CDK1/CDC25A/KLHL18/ZW10/BRCA1/PSME3/ZWINT/FOXM1/PIM2/CCNB3/HSPA2/CDC6/CCNB2/AURKB/CCNG1/LCMT1/CALM1/PLK1/RPS6KB1/PPM1D/NDC80/SKP2/PSMG2/FHL1/RFWD3/CDC7/FBXL12/CD…
GO:0044770	cell cycle phase transition	76/1781	177/7709	2.65419e-09	4.78165e-07	4.49423e-07	76	CDK2/FBXO5/TAF2/CDC23/CDC25C/ZNF16/MAD2L1BP/CKS2/TTK/EZH2/CLSPN/CASP2/ORC1/GEN1/CCNA2/MRE11/PAXIP1/KAT14/RPTOR/E2F7/ANAPC15/CDC25B/CUL4A/TFDP1/TOPBP1/ANAPC1/FAM107A/CCNB1/RIOK2/PLRG1/ANAPC7/CCNJ/ADAMTS1/BUB1B/ZFYVE19/ATP2B4/UBE2C/CCND1/TRIP13/KIF14/TICRR/HINFP/DTL/CDK1/CDC25A/KLHL18/ZW10/BRCA1/PSME3/ZWINT/FOXM1/PIM2/CCNB3/HSPA2/CDC6/CCNB2/AURKB/CCNG1/LCMT1/CALM1/PLK1/RPS6KB1/PPM1D/NDC80/SKP2/PSMG…
GO:0007051	spindle organization	44/1781	83/7709	2.7862e-09	4.78165e-07	4.49423e-07	44	FBXO5/HAUS6/VCP/MAPRE3/CLASP1/MLH1/BORA/CDC20/DCTN6/WDR62/ESPL1/TPX2/KIF3B/CENPJ/RACGAP1/CKAP5/KNSTRN/LZTS2/SBDS/HAUS2/INTS13/AJUBA/ASPM/SPC25/NEK2/NUDC/NUF2/SAC3D1/HAUS3/TUBG1/LOC100856176/DLGAP5/HAUS8/CCNB2/KIF4A/CHD3/HAUS1/PLK1/NDC80/STAG2/HAUS7/STMN1/AURKA/DRG1
GO:0000075	cell cycle checkpoint	42/1781	78/7709	3.43106e-09	5.6207e-07	5.28285e-07	42	DDX39B/MAD2L1BP/MSH2/TTK/CLSPN/CASP2/ORC1/GEN1/MRE11/ANAPC15/CUL4A/TOPBP1/BUB1B/PTPN11/ZFYVE19/NSUN2/CCND1/TRIP13/TICRR/HINFP/DTL/H2AX/CDK1/ATF2/USP28/ZW10/BRCA1/ZWINT/RHNO1/CDC6/PRPF19/AURKB/EME1/FEM1B/LCMT1/PLK1/THOC1/NDC80/FBXO4/PSMG2/RFWD3/CRADD
GO:0051304	chromosome separation	28/1781	43/7709	4.71372e-09	7.3862e-07	6.94223e-07	28	FBXO5/CDC23/MAD2L1BP/TTK/GEN1/MLH1/ANAPC15/ESPL1/ANAPC1/RIOK2/ANAPC7/BUB1B/UBE2C/NCAPD3/TRIP13/ZW10/FANCM/ZWINT/CDC6/AURKB/EME1/PTTG1/LCMT1/PLK1/TOP3A/NDC80/PSMG2/CDC26
GO:0051603	proteolysis involved in cellular protein catabolic process	124/1781	339/7709	7.20082e-09	1.08132e-06	1.01633e-06	124	OS9/TNFAIP3/USP15/MAPK9/DESI1/TRIB1/CDC23/PLAA/CUL7/CUL9/UBAP1/VCP/ECRG4/SEC61B/HSPBP1/ERLEC1/RAD23B/UBE2J1/ALAD/PCYOX1/CUL1/TRIM32/USP38/CUL2/PSMB1/CTSC/NUDT15/CBLC/KCTD2/TMUB1/UBXN4/CDC20/STT3B/VPS36/CUL4A/PSMD13/PSMF1/ANAPC1/HSP90B1/ITCH/RNF7/TRPC4AP/EDEM2/CTSB/ELOC/PBK/RNF13/ANAPC7/USP16/PTK2B/HERPUD1/ERLIN1/UBE2C/BTRC/MYLIP/UBE3A/UCHL5/DNAJB14/LGMN/KIF14/PSMB5/PSMD12/ZNRF3/CTSK/NEDD8/DTL/UBR…
GO:0071166	ribonucleoprotein complex localization	26/1781	39/7709	8.0161e-09	1.1556e-06	1.08614e-06	26	LTV1/NUP107/DDX39B/POLDIP3/SRSF3/NOL6/PRPF31/HNRNPA2B1/XPO1/POLR2D/NUP85/RAN/RRS1/ABCE1/RIOK2/NSUN2/MCM3AP/SSB/SETD2/NUP88/NXF1/DDX39A/THOC1/DDX19B/DDX19A/SARNP
GO:0042254	ribosome biogenesis	62/1781	138/7709	9.75017e-09	1.35152e-06	1.27029e-06	62	LTV1/DCAF13/UTP23/BYSL/RPL7L1/RRP36/NOL6/NOL8/RPS5/XPO1/UTP11/MRPS7/DDX18/WDR43/FBL/CUL4A/SHQ1/NOP56/RAN/ERI1/MTREX/UTP20/BMS1/RRS1/WDR36/ABCE1/RIOK2/NSA2/RPL6/URB1/HELQ/WDR75/WDR3/HEATR3/RRP1B/RRP1/SBDS/HEATR1/NGDN/NOP58/MTG2/FTSJ3/NSUN5/NOP14/NOP2/WDR74/NUP88/LYAR/TSR2/FCF1/MRPL22/RPL7A/RIOK3/ERAL1/RSL1D1/MRPL20/NOC2L/RPF1/MPHOSPH6/NIP7/TFB2M/GTF2H5
GO:0019941	modification-dependent protein catabolic process	109/1781	290/7709	1.11435e-08	1.48745e-06	1.39804e-06	109	OS9/TNFAIP3/USP15/MAPK9/DESI1/TRIB1/CDC23/PLAA/CUL7/CUL9/UBAP1/VCP/ECRG4/SEC61B/HSPBP1/RAD23B/UBE2J1/PCYOX1/CUL1/TRIM32/USP38/CUL2/PSMB1/CBLC/KCTD2/TMUB1/UBXN4/CDC20/STT3B/VPS36/CUL4A/PSMD13/PSMF1/ANAPC1/HSP90B1/ITCH/RNF7/TRPC4AP/EDEM2/ELOC/PBK/RNF13/ANAPC7/USP16/PTK2B/HERPUD1/ERLIN1/UBE2C/BTRC/MYLIP/UBE3A/UCHL5/DNAJB14/KIF14/PSMB5/PSMD12/ZNRF3/NEDD8/DTL/UBR3/PSMA7/PSMD2/RNF215/PSMB4/PSMC5/GID8/C…
GO:0006405	RNA export from nucleus	27/1781	42/7709	1.35016e-08	1.73785e-06	1.63339e-06	27	LTV1/NUP107/DDX39B/POLDIP3/SRSF3/NOL6/XPO5/HNRNPA2B1/XPO1/POLR2D/NUP85/RAN/RRS1/ABCE1/RIOK2/NSUN2/MCM3AP/SSB/DHX9/SETD2/NUP88/NXF1/DDX39A/THOC1/DDX19B/DDX19A/SARNP
GO:1901990	regulation of mitotic cell cycle phase transition	53/1781	113/7709	1.92214e-08	2.38875e-06	2.24517e-06	53	CDK2/FBXO5/CDC23/CDC25C/MAD2L1BP/TTK/EZH2/CLSPN/CASP2/ORC1/GEN1/MRE11/RPTOR/E2F7/ANAPC15/CUL4A/TFDP1/TOPBP1/FAM107A/RIOK2/PLRG1/ANAPC7/ADAMTS1/BUB1B/ZFYVE19/UBE2C/CCND1/TRIP13/KIF14/TICRR/DTL/CDK1/CDC25A/KLHL18/ZW10/BRCA1/PSME3/ZWINT/CCNB3/HSPA2/CDC6/AURKB/LCMT1/PLK1/NDC80/PSMG2/FHL1/RFWD3/CDC7/CDC26/CRADD/ZNF655/FGF10
GO:0071426	ribonucleoprotein complex export from nucleus	25/1781	38/7709	2.34912e-08	2.82208e-06	2.65245e-06	25	LTV1/NUP107/DDX39B/POLDIP3/SRSF3/NOL6/HNRNPA2B1/XPO1/POLR2D/NUP85/RAN/RRS1/ABCE1/RIOK2/NSUN2/MCM3AP/SSB/SETD2/NUP88/NXF1/DDX39A/THOC1/DDX19B/DDX19A/SARNP
GO:0006260	DNA replication	50/1781	105/7709	2.61027e-08	2.97643e-06	2.79752e-06	50	CDK2/FBXO5/EHMT2/DSCC1/MCM9/ORC6/ORC1/GEN1/GRWD1/CCNA2/MRE11/KIN/MCM6/FBH1/POLB/ORC4/E2F7/RRM1/PCNA/RFC3/BRCA2/TOPBP1/MCM4/RAD51/E2F8/RFC5/POLL/NUCKS1/GMNN/STN1/TRAIP/TICRR/DHX9/RFC4/DDX21/FANCM/CDC45/CDC6/EME1/THOC1/METTL4/RPA1/GINS2/RFWD3/CDC7/PRIM2/OOEP/GINS1/FEN1/OBI1
GO:0043632	modification-dependent macromolecule catabolic process	109/1781	294/7709	2.64278e-08	2.97643e-06	2.79752e-06	109	OS9/TNFAIP3/USP15/MAPK9/DESI1/TRIB1/CDC23/PLAA/CUL7/CUL9/UBAP1/VCP/ECRG4/SEC61B/HSPBP1/RAD23B/UBE2J1/PCYOX1/CUL1/TRIM32/USP38/CUL2/PSMB1/CBLC/KCTD2/TMUB1/UBXN4/CDC20/STT3B/VPS36/CUL4A/PSMD13/PSMF1/ANAPC1/HSP90B1/ITCH/RNF7/TRPC4AP/EDEM2/ELOC/PBK/RNF13/ANAPC7/USP16/PTK2B/HERPUD1/ERLIN1/UBE2C/BTRC/MYLIP/UBE3A/UCHL5/DNAJB14/KIF14/PSMB5/PSMD12/ZNRF3/NEDD8/DTL/UBR3/PSMA7/PSMD2/RNF215/PSMB4/PSMC5/GID8/C…
GO:0034622	cellular protein-containing complex assembly	151/1781	441/7709	2.86175e-08	3.12537e-06	2.93751e-06	151	NUP107/DDX39B/FBXO5/BRD2/SAMM50/PFDN6/LOC610181/PTK2/SNRPC/TAF11/PUF60/RPS5/PRPF31/CAPZA2/NDUFB2/GRWD1/LUC7L2/CENPO/NAPA/TBP/RUVBL1/MSRB2/POLR2D/DRC1/SOX9/CENPA/PICALM/MAPRE3/MRPS7/CLNS1A/CELF2/MCM6/BRK1/CRNKL1/PSMC4/DNAH17/NDUFAF5/FCHSD2/MKKS/NDUFA2/EIF2AK2/NDUFAF7/TUBGCP3/NDUFA12/SHQ1/PSMD13/MCM4/TTC17/TM9SF4/NDUFAF2/FAM107A/WASHC3/RRS1/EIF3M/CENPJ/CENPK/EIF2S2/SMARCA5/UQCRFS1/OCLN/SMN/HMGB2/TM…
GO:0044265	cellular macromolecule catabolic process	162/1781	482/7709	3.69261e-08	3.91417e-06	3.67889e-06	162	OS9/TNFAIP3/USP15/MAPK9/POP1/ZHX2/DESI1/TRIB1/CDC23/EXOSC4/PLAA/CUL7/CUL9/UBAP1/VCP/ECRG4/LRPPRC/SEC61B/HSPBP1/ERLEC1/RAD23B/SYNCRIP/UBE2J1/TBRG4/ALAD/PCYOX1/CUL1/TRIM32/USP38/CUL2/PSMB1/POLR2D/CTSC/NUDT15/CBLC/KCTD2/TMUB1/MLH1/DIS3/UBXN4/XRN2/FBH1/CDC20/STT3B/SAMD4B/VPS36/LSM1/CUL4A/PSMD13/ERI1/MTREX/PSMF1/ANAPC1/HSP90B1/ITCH/RNF7/XRN1/TRPC4AP/TTC37/EDEM2/CTSB/ELOC/PBK/RNF13/CNOT1/ANAPC7/USP16/P…
GO:0048193	Golgi vesicle transport	59/1781	133/7709	3.91695e-08	4.02555e-06	3.78358e-06	59	LMAN1/TMED9/SEC24A/STX17/VPS54/RAB1A/NBAS/COPG1/COG3/PREB/GGA3/SEC13/SEC23B/YIF1B/COG6/YIPF5/TMED2/COPB2/TRAPPC11/ERGIC3/COPB1/USO1/EXOC6B/SEC31A/EXOC2/TMEM115/ERGIC2/SEC24B/SORL1/SEC23IP/SEC24D/ARCN1/SCFD1/RNF215/GOSR2/ZW10/SEC23A/MIA2/SAR1A/HTT/SEC24C/BLZF1/USE1/STX5/KDELR2/RAB8A/CNST/LMAN2/TRAPPC1/CLN3/TRAPPC8/STEEP1/VAPA/RAB26/SEC16A/TMED5/ARF4/YIF1A/SAR1B
GO:1901987	regulation of cell cycle phase transition	57/1781	127/7709	4.02108e-08	4.02555e-06	3.78358e-06	57	CDK2/FBXO5/CDC23/CDC25C/ZNF16/MAD2L1BP/TTK/EZH2/CLSPN/CASP2/ORC1/GEN1/MRE11/PAXIP1/RPTOR/E2F7/ANAPC15/CDC25B/CUL4A/TFDP1/TOPBP1/FAM107A/RIOK2/PLRG1/ANAPC7/ADAMTS1/BUB1B/ZFYVE19/ATP2B4/UBE2C/CCND1/TRIP13/KIF14/TICRR/DTL/CDK1/CDC25A/KLHL18/ZW10/BRCA1/PSME3/ZWINT/CCNB3/HSPA2/CDC6/AURKB/LCMT1/PLK1/NDC80/PSMG2/FHL1/RFWD3/CDC7/CDC26/CRADD/ZNF655/FGF10
GO:0006511	ubiquitin-dependent protein catabolic process	105/1781	283/7709	4.58622e-08	4.46723e-06	4.19871e-06	105	OS9/TNFAIP3/USP15/MAPK9/DESI1/TRIB1/CDC23/PLAA/CUL7/CUL9/UBAP1/VCP/ECRG4/SEC61B/HSPBP1/RAD23B/UBE2J1/CUL1/TRIM32/USP38/CUL2/PSMB1/CBLC/KCTD2/TMUB1/UBXN4/CDC20/STT3B/VPS36/CUL4A/PSMD13/PSMF1/ANAPC1/HSP90B1/ITCH/RNF7/TRPC4AP/EDEM2/ELOC/PBK/RNF13/ANAPC7/USP16/PTK2B/HERPUD1/ERLIN1/UBE2C/BTRC/MYLIP/UBE3A/UCHL5/DNAJB14/KIF14/PSMB5/PSMD12/ZNRF3/DTL/UBR3/PSMA7/PSMD2/RNF215/PSMB4/PSMC5/GID8/CCDC47/TLK2/PS…
GO:0034470	ncRNA processing	70/1781	168/7709	4.96115e-08	4.70526e-06	4.42243e-06	70	POP1/DCAF13/UTP23/C1H9orf64/EXOSC4/BYSL/RPL7L1/RRP36/NOL6/NOL8/MTO1/HNRNPA2B1/UTP11/DDX1/PUS7/DDX18/WDR43/FBL/THUMPD3/DPH3/SHQ1/THUMPD2/ERI1/MTREX/UTP20/BMS1/RRS1/WDR36/RIOK2/NSA2/URB1/HELQ/WDR75/WDR3/NSUN2/RRP1B/RRP1/SBDS/HEATR1/NGDN/SSB/FTSJ3/NSUN5/PRORP/POP7/NOP14/NOP2/WDR74/LYAR/INTS5/MRPL44/HSD17B10/TSR2/INTS1/FCF1/INTS14/RPL7A/DICER1/RIOK3/RSL1D1/AARS1/RPF1/URM1/MPHOSPH6/TRMT61A/RPP30/TRMT6…
GO:0007346	regulation of mitotic cell cycle	73/1781	178/7709	5.62151e-08	5.09083e-06	4.78482e-06	73	CDK2/FBXO5/CDC23/CDC25C/CUL7/CUL9/MAD2L1BP/CKS2/MSH2/TTK/EZH2/CLSPN/CASP2/ORC1/GEN1/MRE11/DDIAS/BORA/RPTOR/E2F7/ANAPC15/CUL4A/BRCA2/TFDP1/TOPBP1/KIF20B/FAM107A/RIOK2/PLRG1/ANAPC7/ADAMTS1/TRIM35/BUB1B/PTPN11/ZFYVE19/UBE2C/CCND1/TRIP13/KIF14/INTS13/TICRR/DTL/CDK1/CDC25A/KLHL18/ATF2/ZW10/BRCA1/PSME3/DLGAP5/ZWINT/PIM2/CCNB3/HSPA2/CDC6/AURKB/EME1/GADD45GIP1/TOM1L1/LCMT1/PLK1/RPS6KB1/INSR/NDC80/POLDIP2…
GO:0006261	DNA-dependent DNA replication	37/1781	70/7709	5.6502e-08	5.09083e-06	4.78482e-06	37	CDK2/FBXO5/DSCC1/MCM9/ORC1/GEN1/MRE11/MCM6/FBH1/ORC4/E2F7/PCNA/RFC3/BRCA2/TOPBP1/MCM4/RAD51/E2F8/RFC5/NUCKS1/GMNN/TRAIP/TICRR/RFC4/DDX21/FANCM/CDC45/CDC6/EME1/THOC1/METTL4/RPA1/RFWD3/CDC7/PRIM2/OOEP/GINS1
GO:0051168	nuclear export	34/1781	62/7709	5.88895e-08	5.15245e-06	4.84274e-06	34	LTV1/NUP107/CCHCR1/DDX39B/POLDIP3/DESI1/SRSF3/NOL6/XPO5/HNRNPA2B1/XPO1/POLR2D/NUP85/RAN/RRS1/ABCE1/RIOK2/PTPN11/LZTS2/NSUN2/CSE1L/MCM3AP/SSB/DHX9/SETD2/NUP88/NXF1/DDX39A/CALR/THOC1/DDX19B/DDX19A/SARNP/EMD
GO:0006886	intracellular protein transport	145/1781	424/7709	6.00452e-08	5.15245e-06	4.84274e-06	145	AP3S1/TMED9/OS9/LTV1/NUP107/CCHCR1/DDX39B/UBR5/SAMM50/POLDIP3/SEC24A/DESI1/TOMM22/SRSF3/IFT27/ZDHHC21/NOL6/XPO5/VCP/SRP72/SEC61B/STX17/ERLEC1/HNRNPA2B1/XPO1/UBE2J1/RAB1A/ITGB1BP1/MDFIC/SEC61G/TCAF2/VPS41/KIF5B/SEC61A1/NAPA/PMPCB/COPG1/POLR2D/COG3/DNAJC15/PREB/NUP85/GGA3/IFT122/USP6NL/SRP68/SEC13/SEC23B/SNX5/KIF5C/VPS36/RAN/TM9SF4/IPO7/RRS1/TRIM23/TMED2/ABCE1/COPB2/RIOK2/TIMM10/TRAM1/VPS33A/EDEM2/…
GO:0051983	regulation of chromosome segregation	24/1781	37/7709	6.79411e-08	5.69441e-06	5.35213e-06	24	FBXO5/CDC23/MAD2L1BP/TTK/GEN1/RAD18/ANAPC15/ANAPC1/RIOK2/ANAPC7/BUB1B/UBE2C/TRIP13/ZW10/ZWINT/CDC6/AURKB/PTTG1/LCMT1/PLK1/NDC80/PSMG2/RMI2/CDC26
GO:0044257	cellular protein catabolic process	126/1781	359/7709	8.9047e-08	7.16682e-06	6.73603e-06	126	OS9/TNFAIP3/USP15/MAPK9/DESI1/TRIB1/CDC23/PLAA/CUL7/CUL9/UBAP1/VCP/ECRG4/SEC61B/HSPBP1/ERLEC1/RAD23B/UBE2J1/ALAD/PCYOX1/CUL1/TRIM32/USP38/CUL2/PSMB1/CTSC/NUDT15/CBLC/KCTD2/TMUB1/UBXN4/CDC20/STT3B/VPS36/CUL4A/PSMD13/PSMF1/ANAPC1/HSP90B1/ITCH/RNF7/TRPC4AP/EDEM2/CTSB/ELOC/PBK/RNF13/ANAPC7/USP16/PTK2B/HERPUD1/ERLIN1/UBE2C/BTRC/MYLIP/UBE3A/UCHL5/DNAJB14/LGMN/KIF14/PSMB5/PSMD12/ZNRF3/CTSK/NEDD8/DTL/UBR…
GO:0033045	regulation of sister chromatid segregation	23/1781	35/7709	8.94858e-08	7.16682e-06	6.73603e-06	23	FBXO5/CDC23/MAD2L1BP/TTK/GEN1/ANAPC15/ANAPC1/RIOK2/ANAPC7/BUB1B/UBE2C/TRIP13/ZW10/ZWINT/CDC6/AURKB/PTTG1/LCMT1/PLK1/NDC80/PSMG2/RMI2/CDC26
GO:0007098	centrosome cycle	31/1781	55/7709	9.72311e-08	7.61785e-06	7.15995e-06	31	RTTN/HAUS6/PKHD1/XPO1/GEN1/PLK4/XRCC2/BRCA2/WDR62/CENPJ/CKAP5/HAUS2/AJUBA/NEK2/CEP85/SAC3D1/BRCA1/CEP152/HAUS3/UXT/KIAA0753/HAUS8/CHD3/TRIM37/HAUS1/PLK1/NDC80/HAUS7/SASS6/USP33/AURKA
GO:0016072	rRNA metabolic process	47/1781	100/7709	1.12808e-07	8.57722e-06	8.06165e-06	47	DCAF13/UTP23/EXOSC4/BYSL/RPL7L1/RRP36/NOL6/NOL8/UTP11/DDX18/DIS3/WDR43/FBL/SHQ1/ERI1/MTREX/UTP20/BMS1/RRS1/WDR36/RIOK2/XRN1/NSA2/URB1/HELQ/WDR75/WDR3/RRP1B/RRP1/SBDS/HEATR1/NGDN/FTSJ3/NSUN5/NOP14/NOP2/WDR74/LYAR/TSR2/FCF1/RPL7A/RIOK3/RSL1D1/RPF1/MPHOSPH6/TFB2M/GTF2H5
GO:0010965	regulation of mitotic sister chromatid separation	22/1781	33/7709	1.16616e-07	8.57722e-06	8.06165e-06	22	FBXO5/CDC23/MAD2L1BP/TTK/GEN1/ANAPC15/ANAPC1/RIOK2/ANAPC7/BUB1B/UBE2C/TRIP13/ZW10/ZWINT/CDC6/AURKB/PTTG1/LCMT1/PLK1/NDC80/PSMG2/CDC26
GO:0051306	mitotic sister chromatid separation	22/1781	33/7709	1.16616e-07	8.57722e-06	8.06165e-06	22	FBXO5/CDC23/MAD2L1BP/TTK/GEN1/ANAPC15/ANAPC1/RIOK2/ANAPC7/BUB1B/UBE2C/TRIP13/ZW10/ZWINT/CDC6/AURKB/PTTG1/LCMT1/PLK1/NDC80/PSMG2/CDC26
GO:0006611	protein export from nucleus	32/1781	58/7709	1.19429e-07	8.60846e-06	8.09102e-06	32	LTV1/NUP107/CCHCR1/DDX39B/POLDIP3/DESI1/SRSF3/NOL6/XPO5/HNRNPA2B1/XPO1/POLR2D/NUP85/RAN/RRS1/ABCE1/RIOK2/PTPN11/NSUN2/CSE1L/MCM3AP/SSB/SETD2/NUP88/NXF1/DDX39A/CALR/THOC1/DDX19B/DDX19A/SARNP/EMD
GO:0006310	DNA recombination	52/1781	116/7709	1.65646e-07	1.17057e-05	1.10021e-05	52	MCM9/XRCC6/MSH2/MEI4/GEN1/RUVBL2/RUVBL1/MRE11/RAD54L/MLH1/XRCC2/PAXIP1/MCM6/FBH1/POLB/AP5S1/BRCA2/HMGB1/MCM4/PARPBP/ACTR8/MND1/XRCC4/HELQ/RAD54B/RAD51/NUCKS1/TRIP13/RECQL/H2AX/KDM1A/SETD2/FANCM/BRCA1/RHNO1/EXO1/RAD52/AP5Z1/ZFYVE26/EME1/PPP4C/SLX1A/THOC1/RMI2/RPA1/GINS2/RFWD3/CDC7/OOEP/PALB2/H1-4/SFR1
GO:0051301	cell division	73/1781	183/7709	2.12379e-07	1.47195e-05	1.38347e-05	73	KATNA1/FBXO5/MYC/CDC23/CDC25C/MYH9/DCTN3/VEGFA/CKS2/ANLN/CDCA8/PLK4/CENPA/MAPRE3/BORA/E2F7/CKAP2/CDC25B/BRCA2/NCAPH/RAN/TPX2/ANAPC1/CENPJ/RACGAP1/ANAPC7/PPP1CC/DSN1/USP16/MIS18A/ZFYVE19/E2F8/LZTS2/NCAPD3/CCND1/SMC3/HTR2B/SGO2/KIF14/ASPM/TXNIP/SPC25/ENSA/NUDC/PARD3B/CDC25A/NUF2/SKA1/SETD2/ZW10/KIF18B/CDCA5/ANAPC16/HAUS3/NCAPD2/PDS5A/CCNB3/CDC6/ZFYVE26/KIF4A/PGF/AURKB/CALM1/SPC24/HAUS1/PLK1/NDC80/S…
GO:0015931	nucleobase-containing compound transport	37/1781	73/7709	2.33246e-07	1.58607e-05	1.49073e-05	37	LTV1/NUP107/DDX39B/POLDIP3/SRSF3/NOL6/XPO5/HNRNPA2B1/XPO1/POLR2D/NUP85/SEC13/RAN/RRS1/ABCE1/RIOK2/P2RX7/NSUN2/TOMM20/MCM3AP/SSB/DHX9/SETD2/NUP88/NXF1/EIF5A/DDX39A/SLC35B1/SNUPN/THOC1/SLC25A5/SLC25A33/LRRC8A/SLC35A3/DDX19B/DDX19A/SARNP
GO:1905818	regulation of chromosome separation	22/1781	34/7709	2.58466e-07	1.72502e-05	1.62133e-05	22	FBXO5/CDC23/MAD2L1BP/TTK/GEN1/ANAPC15/ANAPC1/RIOK2/ANAPC7/BUB1B/UBE2C/TRIP13/ZW10/ZWINT/CDC6/AURKB/PTTG1/LCMT1/PLK1/NDC80/PSMG2/CDC26
GO:0006396	RNA processing	145/1781	434/7709	3.03184e-07	1.98668e-05	1.86726e-05	145	TXNL4A/HNRNPH1/POP1/DDX39B/DCAF13/UTP23/PHF5A/SNRPC/HNRNPK/PUF60/C1H9orf64/SRSF3/EXOSC4/BYSL/RPL7L1/RRP36/NOL6/NOL8/U2AF2/MTO1/PRPF31/HNRNPA2B1/PABPC4/TBRG4/UTP11/DDX1/PRPF38A/SF3B6/PUS7/LUC7L2/POLR2D/WBP4/CLNS1A/DDX18/CELF2/SNRPA/XRN2/RBM17/WDR43/CRNKL1/FBL/THUMPD3/SNRPB2/DPH3/LSM1/SHQ1/RBM27/THUMPD2/ERI1/MTREX/UTP20/HNRNPF/BMS1/RRS1/WDR36/RIOK2/SMN/NSA2/PLRG1/TMBIM6/URB1/HELQ/SRSF6/SCAF11/WDR75…
GO:0045786	negative regulation of cell cycle	74/1781	188/7709	3.28935e-07	2.09893e-05	1.97277e-05	74	TNFAIP3/MDM2/DDX39B/FBXO5/MAD2L1BP/MSH2/TTK/EZH2/CLSPN/CASP2/ORC1/GEN1/MRE11/DDIAS/PPM1G/E2F7/ANAPC15/CUL4A/TOPBP1/FAM107A/TRIM35/BUB1B/PTPN11/ZFYVE19/TP53INP1/E2F8/NSUN2/GMNN/CCND1/TRIP13/ERN1/TICRR/NEK2/GAS2L1/HINFP/DTL/H2AX/CDK1/ATF2/USP28/ZW10/IL12A/BRCA1/CDKN3/ZWINT/RHNO1/FOXM1/CDC6/PRPF19/AURKB/EME1/GADD45GIP1/CALR/PTTG1/TOM1L1/FEM1B/LCMT1/TRIM37/PRR11/PLK1/THOC1/NDC80/FBXO4/PSMG2/FHL1/STK1…
GO:0007091	metaphase/anaphase transition of mitotic cell cycle	21/1781	32/7709	3.41584e-07	2.09893e-05	1.97277e-05	21	FBXO5/CDC23/MAD2L1BP/TTK/GEN1/ANAPC15/ANAPC1/RIOK2/ANAPC7/BUB1B/UBE2C/TRIP13/ZW10/ZWINT/CDC6/AURKB/LCMT1/PLK1/NDC80/PSMG2/CDC26
GO:0044784	metaphase/anaphase transition of cell cycle	21/1781	32/7709	3.41584e-07	2.09893e-05	1.97277e-05	21	FBXO5/CDC23/MAD2L1BP/TTK/GEN1/ANAPC15/ANAPC1/RIOK2/ANAPC7/BUB1B/UBE2C/TRIP13/ZW10/ZWINT/CDC6/AURKB/LCMT1/PLK1/NDC80/PSMG2/CDC26
GO:0007093	mitotic cell cycle checkpoint	29/1781	52/7709	3.4361e-07	2.09893e-05	1.97277e-05	29	MAD2L1BP/MSH2/TTK/CLSPN/CASP2/ORC1/GEN1/MRE11/ANAPC15/TOPBP1/BUB1B/ZFYVE19/CCND1/TRIP13/TICRR/CDK1/ATF2/ZW10/BRCA1/ZWINT/CDC6/AURKB/EME1/LCMT1/PLK1/NDC80/PSMG2/RFWD3/CRADD
GO:0030163	protein catabolic process	140/1781	417/7709	3.5657e-07	2.1418e-05	2.01306e-05	140	OS9/TNFAIP3/USP15/MAPK9/DESI1/TRIB1/CDC23/PLAA/CUL7/CUL9/UBAP1/VCP/ECRG4/SEC61B/HSPBP1/ERLEC1/RAD23B/XPO1/UBE2J1/ALAD/PCYOX1/CUL1/TRIM32/USP38/CUL2/PSMB1/CTSC/NUDT15/CBLC/KCTD2/GGA3/TMUB1/UBXN4/CDC20/PSMC4/STT3B/VPS36/CUL4A/PSMD13/PSMF1/ANAPC1/HSP90B1/ITCH/RNF7/TRPC4AP/EDEM2/CTSB/ELOC/PBK/RNF13/P2RX7/ANAPC7/USP16/PTK2B/HERPUD1/ERLIN1/UBE2C/BTRC/MYLIP/UBE3A/UCHL5/DNAJB14/MANBA/PSMD1/LGMN/KIF14/PSM…
GO:1902850	microtubule cytoskeleton organization involved in mitosis	33/1781	63/7709	3.89528e-07	2.30141e-05	2.16308e-05	33	VCP/PKHD1/CENPA/CLASP1/BORA/CDC20/SPRY2/DCTN6/WDR62/TPX2/KIF3B/RACGAP1/CKAP5/SBDS/INTS13/SPC25/NEK2/NUDC/NUF2/SETD2/ZW10/HTT/TUBG1/LOC100856176/DLGAP5/KIF4A/PLK1/NDC80/STAG2/STMN1/AURKA/DRG1/FGF10
GO:0010564	regulation of cell cycle process	91/1781	246/7709	4.29636e-07	2.49743e-05	2.34732e-05	91	CDK2/MDM2/FBXO5/CDC23/CDC25C/ZNF16/CUL7/CUL9/MAD2L1BP/PKHD1/TTK/XPO1/EZH2/CLSPN/CASP2/ORC1/GEN1/PLK4/MRE11/SOX9/BORA/PAXIP1/CDC20/RPTOR/E2F7/ANAPC15/CDC25B/CUL4A/BRCA2/TFDP1/TOPBP1/TPX2/ANAPC1/KIF20B/FAM107A/CENPJ/RIOK2/RACGAP1/PLRG1/ANAPC7/ADAMTS1/BUB1B/KNSTRN/ZFYVE19/E2F8/ATP2B4/UBE2C/CCND1/TRIP13/KIF14/TICRR/NEK2/DTL/CEP85/CDK1/CDC25A/KLHL18/SETD2/ZW10/BRCA1/PSME3/ZWINT/RHNO1/FOXM1/CCNB3/HSPA2…
GO:0006364	rRNA processing	44/1781	95/7709	4.79488e-07	2.70306e-05	2.54058e-05	44	DCAF13/UTP23/BYSL/RPL7L1/RRP36/NOL6/NOL8/UTP11/DDX18/WDR43/FBL/SHQ1/ERI1/MTREX/UTP20/BMS1/RRS1/WDR36/RIOK2/NSA2/URB1/HELQ/WDR75/WDR3/RRP1B/RRP1/SBDS/HEATR1/NGDN/FTSJ3/NSUN5/NOP14/NOP2/WDR74/LYAR/TSR2/FCF1/RPL7A/RIOK3/RSL1D1/RPF1/MPHOSPH6/TFB2M/GTF2H5
GO:0050657	nucleic acid transport	31/1781	58/7709	4.8751e-07	2.70306e-05	2.54058e-05	31	LTV1/NUP107/DDX39B/POLDIP3/SRSF3/NOL6/XPO5/HNRNPA2B1/XPO1/POLR2D/NUP85/SEC13/RAN/RRS1/ABCE1/RIOK2/NSUN2/TOMM20/MCM3AP/SSB/DHX9/SETD2/NUP88/NXF1/EIF5A/DDX39A/SNUPN/THOC1/DDX19B/DDX19A/SARNP
GO:0050658	RNA transport	31/1781	58/7709	4.8751e-07	2.70306e-05	2.54058e-05	31	LTV1/NUP107/DDX39B/POLDIP3/SRSF3/NOL6/XPO5/HNRNPA2B1/XPO1/POLR2D/NUP85/SEC13/RAN/RRS1/ABCE1/RIOK2/NSUN2/TOMM20/MCM3AP/SSB/DHX9/SETD2/NUP88/NXF1/EIF5A/DDX39A/SNUPN/THOC1/DDX19B/DDX19A/SARNP
GO:0034976	response to endoplasmic reticulum stress	52/1781	120/7709	6.14713e-07	3.35671e-05	3.15494e-05	52	OS9/CANX/ATF4/GRINA/TMEM33/VCP/CREB3/SEC61B/ERLEC1/UBE2J1/HERPUD2/PDIA4/TMUB1/UBXN4/STT3B/P4HB/EIF2AK2/COPS5/HSP90B1/TMED2/EDEM2/TMBIM6/HERPUD1/SERINC3/ERLIN1/TMEM117/DNAJB14/ERN1/SESN2/ATF3/GORASP2/CCDC47/TBL2/PDIA3/TMCO1/EDEM3/DNAJC10/UFD1/TMX1/BHLHA15/EIF2S1/POMT2/SEL1L/USP14/BFAR/PTPN2/UBXN6/LOC480667/SEC16A/HSPA5/RNF139/DDIT3
GO:1903046	meiotic cell cycle process	40/1781	84/7709	6.43666e-07	3.46235e-05	3.25423e-05	40	FBXO5/EHMT2/CDC25C/CKS2/SMC2/MEI4/TTK/MRE11/RAD54L/MLH1/CDC20/BRCA2/PSMD13/ESPL1/MND1/BUB1B/RAD54B/RAD51/NCAPD3/KIF18A/NSUN2/TRIP13/SGO2/ASPM/TDRKH/CDC25A/NUF2/FANCM/TUBG1/LOC100856176/NCAPD2/HSPA2/CCNB2/EME1/CALR/PTTG1/PLK1/FANCA/OOEP/AURKA
GO:0031023	microtubule organizing center organization	31/1781	59/7709	8.01817e-07	4.18804e-05	3.93631e-05	31	RTTN/HAUS6/PKHD1/XPO1/GEN1/PLK4/XRCC2/BRCA2/WDR62/CENPJ/CKAP5/HAUS2/AJUBA/NEK2/CEP85/SAC3D1/BRCA1/CEP152/HAUS3/UXT/KIAA0753/HAUS8/CHD3/TRIM37/HAUS1/PLK1/NDC80/HAUS7/SASS6/USP33/AURKA
GO:0051236	establishment of RNA localization	31/1781	59/7709	8.01817e-07	4.18804e-05	3.93631e-05	31	LTV1/NUP107/DDX39B/POLDIP3/SRSF3/NOL6/XPO5/HNRNPA2B1/XPO1/POLR2D/NUP85/SEC13/RAN/RRS1/ABCE1/RIOK2/NSUN2/TOMM20/MCM3AP/SSB/DHX9/SETD2/NUP88/NXF1/EIF5A/DDX39A/SNUPN/THOC1/DDX19B/DDX19A/SARNP
GO:0030071	regulation of mitotic metaphase/anaphase transition	20/1781	31/7709	9.85192e-07	5.00089e-05	4.70029e-05	20	FBXO5/CDC23/MAD2L1BP/TTK/GEN1/ANAPC15/RIOK2/ANAPC7/BUB1B/UBE2C/TRIP13/ZW10/ZWINT/CDC6/AURKB/LCMT1/PLK1/NDC80/PSMG2/CDC26
GO:1902099	regulation of metaphase/anaphase transition of cell cycle	20/1781	31/7709	9.85192e-07	5.00089e-05	4.70029e-05	20	FBXO5/CDC23/MAD2L1BP/TTK/GEN1/ANAPC15/RIOK2/ANAPC7/BUB1B/UBE2C/TRIP13/ZW10/ZWINT/CDC6/AURKB/LCMT1/PLK1/NDC80/PSMG2/CDC26
GO:0006457	protein folding	40/1781	87/7709	1.99384e-06	9.8579e-05	9.26535e-05	40	CANX/CCT2/PFDN6/LOC610181/PPIH/CCT4/PDIA4/CRTAP/HSPA14/MKKS/PFDN1/LOC102152612/P4HB/PFDN5/HSP90B1/PPID/CCT7/CCT5/DNAJB14/HSPD1/LOC609748/TBCEL/NUDC/PPIG/PEX19/PDIA3/DNAJC10/FKBP4/HSPA2/CCT3/CALR/NUDCD2/AHSA1/CDC37/CD74/VBP1/DNLZ/HSPA5/SDF2/HSPA13
GO:0000226	microtubule cytoskeleton organization	96/1781	271/7709	1.99674e-06	9.8579e-05	9.26535e-05	96	RTTN/KATNA1/TUBB/FBXO5/HAUS6/CUL7/CUL9/KIF24/VCP/PKHD1/XPO1/GEN1/PLK4/TUBE1/DRC1/RSPH6A/CENPA/MAPRE3/CLASP1/MLH1/XRCC2/BORA/CDC20/SPRY2/DNAH17/TUBGCP3/BRCA2/DCTN6/WDR62/ESPL1/TPX2/KIF3B/FAM107A/CENPJ/WEE1/OCLN/RACGAP1/TUBA1C/CKAP5/KNSTRN/LZTS2/KIF18A/SBDS/GSK3B/HAUS2/INTS13/AJUBA/ASPM/TBCEL/SPC25/NEK2/GAS2L1/NUDC/CEP85/PARD3B/NUF2/SKA1/SETD2/ZW10/KIF18B/SAC3D1/BRCA1/HTT/CEP152/HAUS3/TUBG1/LOC1008…
GO:0070972	protein localization to endoplasmic reticulum	20/1781	32/7709	2.05787e-06	0.000100224	9.41997e-05	20	OS9/SRP72/SEC61B/SEC61G/SEC61A1/SRP68/TRAM1/SSR3/HERPUD1/SRPRA/SRP54/KDELR2/SRP9/VAPA/SEC16A/HSPA5/SPCS3/SRP14/SRP19/SPCS2
GO:0000725	recombinational repair	33/1781	67/7709	2.38712e-06	0.000114709	0.000107814	33	MCM9/GEN1/MRE11/RAD54L/XRCC2/MCM6/FBH1/AP5S1/BRCA2/MCM4/PARPBP/HELQ/RAD54B/RAD51/NUCKS1/H2AX/KDM1A/SETD2/FANCM/BRCA1/RHNO1/RAD52/AP5Z1/ZFYVE26/PPP4C/RMI2/RPA1/GINS2/RFWD3/CDC7/OOEP/PALB2/SFR1
GO:0000086	G2/M transition of mitotic cell cycle	29/1781	56/7709	2.67458e-06	0.000125184	0.00011766	29	CDK2/FBXO5/TAF2/CDC25C/CLSPN/ORC1/CCNA2/MRE11/KAT14/TOPBP1/ZFYVE19/CCND1/KIF14/TICRR/DTL/CDK1/CDC25A/BRCA1/FOXM1/CCNB3/HSPA2/CDC6/CALM1/PLK1/PPM1D/SKP2/FHL1/CDC7/FBXL12
GO:0006119	oxidative phosphorylation	29/1781	56/7709	2.67458e-06	0.000125184	0.00011766	29	UQCRQ/NDUFB9/CYC1/VCP/MSH2/CYCS/UQCRH/NDUFC2/ATP5F1C/NDUFA12/UQCRFS1/NDUFAF1/CHCHD2/NDUFS8/NDUFV1/ISCU/NDUFA10/NDUFS2/NDUFS1/COX8A/UQCC3/COX5A/TEFM/NDUFA7/ABCD1/SLC25A33/COX4I1/ATP5PO/COX7A2L
GO:0051321	meiotic cell cycle	43/1781	97/7709	2.76926e-06	0.000127954	0.000120263	43	FBXO5/EHMT2/CDC25C/CKS2/SMC2/MEI4/TTK/MRE11/RAD54L/MLH1/CDC20/BRCA2/PSMD13/ESPL1/MND1/BUB1B/RAD54B/RAD51/NCAPD3/KIF18A/NSUN2/SMC3/TRIP13/SGO2/ASPM/TDRKH/CDC25A/NUF2/FANCM/TUBG1/LOC100856176/NCAPD2/CCNB3/HSPA2/CCNB2/EME1/CALR/PTTG1/PLK1/RPA1/FANCA/OOEP/AURKA
GO:0045047	protein targeting to ER	16/1781	23/7709	2.80671e-06	0.000128043	0.000120346	16	SRP72/SEC61B/SEC61G/SEC61A1/SRP68/TRAM1/SSR3/HERPUD1/SRPRA/SRP54/SRP9/HSPA5/SPCS3/SRP14/SRP19/SPCS2
GO:0044839	cell cycle G2/M phase transition	32/1781	65/7709	3.43177e-06	0.000152693	0.000143515	32	CDK2/FBXO5/TAF2/CDC25C/CLSPN/ORC1/CCNA2/MRE11/PAXIP1/KAT14/CDC25B/TOPBP1/ZFYVE19/CCND1/KIF14/TICRR/DTL/CDK1/CDC25A/BRCA1/FOXM1/CCNB3/HSPA2/CDC6/CCNB2/CALM1/PLK1/PPM1D/SKP2/FHL1/CDC7/FBXL12
GO:1901991	negative regulation of mitotic cell cycle phase transition	32/1781	65/7709	3.43177e-06	0.000152693	0.000143515	32	FBXO5/MAD2L1BP/TTK/EZH2/CLSPN/CASP2/ORC1/GEN1/MRE11/E2F7/ANAPC15/TOPBP1/FAM107A/BUB1B/ZFYVE19/CCND1/TRIP13/TICRR/CDK1/ZW10/BRCA1/ZWINT/CDC6/AURKB/LCMT1/PLK1/NDC80/PSMG2/FHL1/RFWD3/CRADD/ZNF655
GO:0006403	RNA localization	34/1781	71/7709	3.7735e-06	0.00016585	0.000155881	34	LTV1/NUP107/DDX39B/POLDIP3/SRSF3/NOL6/XPO5/HNRNPA2B1/XPO1/CCT4/POLR2D/NUP85/SEC13/FBL/RAN/RRS1/ABCE1/RIOK2/NSUN2/TOMM20/MCM3AP/SSB/NOP58/DHX9/SETD2/NUP88/NXF1/EIF5A/DDX39A/SNUPN/THOC1/DDX19B/DDX19A/SARNP
GO:0031570	DNA integrity checkpoint	28/1781	54/7709	3.84496e-06	0.000166955	0.000156919	28	DDX39B/MSH2/CLSPN/CASP2/ORC1/MRE11/CUL4A/TOPBP1/PTPN11/CCND1/TICRR/HINFP/DTL/H2AX/CDK1/ATF2/USP28/BRCA1/RHNO1/CDC6/PRPF19/EME1/FEM1B/PLK1/THOC1/FBXO4/RFWD3/CRADD
GO:0090114	COPII-coated vesicle budding	14/1781	19/7709	4.14267e-06	0.00017774	0.000167057	14	SEC24A/RAB1A/PREB/SEC13/SEC23B/SEC31A/SEC24B/SEC24D/SEC23A/SAR1A/SEC24C/VAPA/SEC16A/SAR1B
GO:0006614	SRP-dependent cotranslational protein targeting to membrane	11/1781	13/7709	4.74998e-06	0.000201399	0.000189294	11	SRP72/SEC61B/SEC61A1/SRP68/TRAM1/SSR3/SRPRA/SRP54/SRP9/SRP14/SRP19
GO:0006406	mRNA export from nucleus	17/1781	26/7709	5.02146e-06	0.000208015	0.000195512	17	NUP107/DDX39B/POLDIP3/SRSF3/HNRNPA2B1/POLR2D/NUP85/NSUN2/MCM3AP/SETD2/NUP88/NXF1/DDX39A/THOC1/DDX19B/DDX19A/SARNP
GO:0071427	mRNA-containing ribonucleoprotein complex export from nucleus	17/1781	26/7709	5.02146e-06	0.000208015	0.000195512	17	NUP107/DDX39B/POLDIP3/SRSF3/HNRNPA2B1/POLR2D/NUP85/NSUN2/MCM3AP/SETD2/NUP88/NXF1/DDX39A/THOC1/DDX19B/DDX19A/SARNP
GO:0000724	double-strand break repair via homologous recombination	32/1781	66/7709	5.20081e-06	0.000212997	0.000200194	32	MCM9/GEN1/MRE11/RAD54L/XRCC2/MCM6/FBH1/AP5S1/BRCA2/MCM4/PARPBP/HELQ/RAD54B/RAD51/NUCKS1/H2AX/KDM1A/SETD2/FANCM/BRCA1/RAD52/AP5Z1/ZFYVE26/PPP4C/RMI2/RPA1/GINS2/RFWD3/CDC7/OOEP/PALB2/SFR1
GO:0007005	mitochondrion organization	75/1781	204/7709	5.78026e-06	0.000234068	0.000219999	75	ATG12/MTFR2/SAMM50/FANCG/CAMKMT/NDUFB2/PMPCB/TMEM135/NECTIN2/DNAJC15/NDUFAF5/NDUFA2/NDUFAF7/NDUFA12/BCL2L1/NDUFAF2/ARMC1/MARCHF5/MAP1LC3A/UQCRFS1/TIMM10/P2RX7/ATG13/AMBRA1/NDUFAF6/NDUFAF1/CHCHD2/TIMM17A/CISD2/ZDHHC6/COX17/NDUFS8/NDUFB4/MFN1/TOMM20/SESN2/PARL/TFAM/NDUFA10/MTFR1L/NDUFS2/ATF2/FUNDC1/HTT/CCDC56/RAB3A/ATG9A/BHLHA15/TIMM17B/UQCC3/NDUFB7/HSD17B10/GBA/MTX1/SLIRP/APOOL/DNM2/CDC37/PSMD10/T…
GO:0072599	establishment of protein localization to endoplasmic reticulum	16/1781	24/7709	6.61364e-06	0.00026484	0.00024892	16	SRP72/SEC61B/SEC61G/SEC61A1/SRP68/TRAM1/SSR3/HERPUD1/SRPRA/SRP54/SRP9/HSPA5/SPCS3/SRP14/SRP19/SPCS2
GO:0006913	nucleocytoplasmic transport	50/1781	122/7709	7.072e-06	0.000277038	0.000260386	50	LTV1/NUP107/CCHCR1/DDX39B/UBR5/POLDIP3/DESI1/SRSF3/NOL6/XPO5/HNRNPA2B1/XPO1/MDFIC/POLR2D/NUP85/SEC13/RAN/AAAS/IPO7/RRS1/ABCE1/RIOK2/PRKAG1/PTPN11/LZTS2/HTATIP2/HEATR3/NSUN2/CSE1L/TXNIP/KPNA2/MCM3AP/SSB/DHX9/SETD2/NUP88/NXF1/NEDD4/DDX39A/KPNB1/CALR/TNPO2/SNUPN/THOC1/DDX19B/DDX19A/SARNP/NXT2/HIKESHI/EMD
GO:0051169	nuclear transport	50/1781	122/7709	7.072e-06	0.000277038	0.000260386	50	LTV1/NUP107/CCHCR1/DDX39B/UBR5/POLDIP3/DESI1/SRSF3/NOL6/XPO5/HNRNPA2B1/XPO1/MDFIC/POLR2D/NUP85/SEC13/RAN/AAAS/IPO7/RRS1/ABCE1/RIOK2/PRKAG1/PTPN11/LZTS2/HTATIP2/HEATR3/NSUN2/CSE1L/TXNIP/KPNA2/MCM3AP/SSB/DHX9/SETD2/NUP88/NXF1/NEDD4/DDX39A/KPNB1/CALR/TNPO2/SNUPN/THOC1/DDX19B/DDX19A/SARNP/NXT2/HIKESHI/EMD
GO:0045333	cellular respiration	31/1781	64/7709	7.47366e-06	0.000289624	0.000272215	31	MTFR2/UQCRQ/NDUFB9/CYC1/IREB2/VCP/CYCS/MDH1/UQCRH/NDUFC2/NDUFA12/SIRT3/SUCLG2/IDH3B/UQCRFS1/SUCLG1/NDUFAF1/CHCHD2/NDUFS8/NDUFV1/ISCU/NDUFA10/MTFR1L/NDUFS2/NDUFS1/IDH3A/FH/UQCC3/SDHB/NDUFA7/COX4I1
GO:0010498	proteasomal protein catabolic process	76/1781	210/7709	9.7213e-06	0.000372719	0.000350315	76	OS9/MAPK9/DESI1/TRIB1/CDC23/VCP/ECRG4/SEC61B/HSPBP1/ERLEC1/RAD23B/UBE2J1/ALAD/CUL1/CUL2/PSMB1/NUDT15/KCTD2/TMUB1/UBXN4/CDC20/STT3B/CUL4A/PSMF1/ANAPC1/HSP90B1/ITCH/EDEM2/PBK/ANAPC7/HERPUD1/ERLIN1/UBE2C/BTRC/DNAJB14/KIF14/PSMB5/PSMD12/UBR3/PSMA7/PSMD2/PSMB4/PSMC5/GID8/CCDC47/TLK2/PSMA6/EDEM3/DNAJC10/UFD1/PSME3/ZSWIM8/PSMB6/NEDD4/PRPF19/PSMB3/GBA/POMT2/SEL1L/PLK1/PSMD10/USP14/FBXO4/SKP2/BFAR/UBXN6/L…
GO:0006302	double-strand break repair	47/1781	114/7709	1.09552e-05	0.000415606	0.000390624	47	UBR5/MCM9/XRCC6/VCP/MSH2/CYREN/GEN1/MRE11/RAD54L/MLH1/XRCC2/MCM6/FBH1/POLB/AP5S1/BRCA2/MCM4/PARPBP/ACTR8/XRCC4/HELQ/RAD54B/RAD51/NUCKS1/TRIP13/H2AX/KDM1A/SETD2/FANCM/BRCA1/FOXM1/RAD52/AP5Z1/PRPF19/ZFYVE26/EME1/PPP4C/RMI2/RPA1/SETX/GINS2/RFWD3/CDC7/OOEP/UBE2V2/PALB2/SFR1
GO:0007052	mitotic spindle organization	26/1781	51/7709	1.26862e-05	0.000476261	0.000447633	26	VCP/CLASP1/BORA/CDC20/DCTN6/WDR62/TPX2/KIF3B/RACGAP1/CKAP5/SBDS/INTS13/SPC25/NEK2/NUDC/NUF2/TUBG1/LOC100856176/DLGAP5/KIF4A/PLK1/NDC80/STAG2/STMN1/AURKA/DRG1
GO:0030330	DNA damage response, signal transduction by p53 class mediator	13/1781	18/7709	1.33785e-05	0.000492	0.000462426	13	CASP2/FOXO3/PAXIP1/E2F7/BRCA2/SPRED1/SESN2/KDM1A/FOXM1/PPM1D/PSMD10/CD74/CRADD
GO:0031297	replication fork processing	13/1781	18/7709	1.33785e-05	0.000492	0.000462426	13	GEN1/MRE11/FBH1/PCNA/BRCA2/RAD51/NUCKS1/TRAIP/FANCM/EME1/THOC1/RFWD3/OOEP
GO:0042775	mitochondrial ATP synthesis coupled electron transport	18/1781	30/7709	1.52729e-05	0.000555996	0.000522576	18	UQCRQ/NDUFB9/CYC1/CYCS/UQCRH/NDUFC2/NDUFA12/UQCRFS1/NDUFAF1/CHCHD2/NDUFS8/NDUFV1/ISCU/NDUFA10/NDUFS2/UQCC3/NDUFA7/COX4I1
GO:0065004	protein-DNA complex assembly	33/1781	72/7709	1.68181e-05	0.000600122	0.000564049	33	BRD2/TAF11/GRWD1/CENPO/TBP/SOX9/CENPA/MCM6/PSMC4/MCM4/CENPK/SMARCA5/HMGB2/HELLS/MIS18A/RAD51/SPTY2D1/NAP1L4/GMNN/PSMC5/HAT1/H4-16/H4C8/HIRA/HP1BP3/DLGAP5/RAD52/CENPN/DR1/H2BU1/CENPW/H1-4/GTF2H5
GO:1901988	negative regulation of cell cycle phase transition	33/1781	72/7709	1.68181e-05	0.000600122	0.000564049	33	FBXO5/MAD2L1BP/TTK/EZH2/CLSPN/CASP2/ORC1/GEN1/MRE11/E2F7/ANAPC15/TOPBP1/FAM107A/BUB1B/ZFYVE19/CCND1/TRIP13/TICRR/DTL/CDK1/ZW10/BRCA1/ZWINT/CDC6/AURKB/LCMT1/PLK1/NDC80/PSMG2/FHL1/RFWD3/CRADD/ZNF655
GO:0035459	vesicle cargo loading	11/1781	14/7709	1.75112e-05	0.000614878	0.000577918	11	SEC24A/RAB1A/PICALM/SEC23B/SEC31A/SEC24B/SEC24D/SEC23A/MIA2/SAR1A/SEC24C
GO:1901989	positive regulation of cell cycle phase transition	21/1781	38/7709	1.75728e-05	0.000614878	0.000577918	21	FBXO5/CDC23/CDC25C/ZNF16/MAD2L1BP/EZH2/RPTOR/CDC25B/CUL4A/TFDP1/PLRG1/ANAPC7/ADAMTS1/UBE2C/CCND1/DTL/CDC25A/KLHL18/HSPA2/CDC7/FGF10
GO:0033365	protein localization to organelle	109/1781	331/7709	1.9359e-05	0.000640628	0.000602121	109	OS9/TNFAIP3/NUP107/UBR5/SAMM50/MCM9/VCP/SRP72/NOL8/XPA/SEC61B/MSH2/TTK/XPO1/CCT4/MDFIC/EZH2/SEC61G/VPS41/RUVBL2/SEC61A1/PMPCB/CENPA/COG3/MAPRE3/DNAJC15/AKAP11/NUP85/GGA3/IFT122/SRP68/SEC13/EMC3/VPS36/BRCA2/RAN/IPO7/RRS1/MARCHF5/TIMM10/TRAM1/PLRG1/TCTN1/XRCC4/ARL2BP/SSR3/BUB1B/HERPUD1/LZTS2/HEATR3/CCT5/SRPRA/TIMM17A/INTS13/CSE1L/TXNIP/TOMM20/KPNA2/SORL1/SESN2/AP2M1/SSB/SUMO1/PEX19/RNF215/DHX9/SRP5…
GO:0033046	negative regulation of sister chromatid segregation	15/1781	23/7709	1.93753e-05	0.000640628	0.000602121	15	FBXO5/MAD2L1BP/TTK/GEN1/ANAPC15/BUB1B/TRIP13/ZW10/ZWINT/AURKB/PTTG1/LCMT1/PLK1/NDC80/PSMG2
GO:0033048	negative regulation of mitotic sister chromatid segregation	15/1781	23/7709	1.93753e-05	0.000640628	0.000602121	15	FBXO5/MAD2L1BP/TTK/GEN1/ANAPC15/BUB1B/TRIP13/ZW10/ZWINT/AURKB/PTTG1/LCMT1/PLK1/NDC80/PSMG2
GO:0051985	negative regulation of chromosome segregation	15/1781	23/7709	1.93753e-05	0.000640628	0.000602121	15	FBXO5/MAD2L1BP/TTK/GEN1/ANAPC15/BUB1B/TRIP13/ZW10/ZWINT/AURKB/PTTG1/LCMT1/PLK1/NDC80/PSMG2
GO:1905819	negative regulation of chromosome separation	15/1781	23/7709	1.93753e-05	0.000640628	0.000602121	15	FBXO5/MAD2L1BP/TTK/GEN1/ANAPC15/BUB1B/TRIP13/ZW10/ZWINT/AURKB/PTTG1/LCMT1/PLK1/NDC80/PSMG2
GO:2000816	negative regulation of mitotic sister chromatid separation	15/1781	23/7709	1.93753e-05	0.000640628	0.000602121	15	FBXO5/MAD2L1BP/TTK/GEN1/ANAPC15/BUB1B/TRIP13/ZW10/ZWINT/AURKB/PTTG1/LCMT1/PLK1/NDC80/PSMG2
GO:0042773	ATP synthesis coupled electron transport	19/1781	33/7709	2.01935e-05	0.000661612	0.000621843	19	UQCRQ/NDUFB9/CYC1/CYCS/UQCRH/NDUFC2/NDUFA12/UQCRFS1/NDUFAF1/CHCHD2/NDUFS8/NDUFV1/ISCU/NDUFA10/NDUFS2/NDUFS1/UQCC3/NDUFA7/COX4I1
GO:0006518	peptide metabolic process	119/1781	369/7709	2.38959e-05	0.000775862	0.000729226	119	SEC11C/NARS1/HBS1L/MARS1/CLIC1/VARS1/MRPL13/MRPL55/DAPK1/PUM3/SECISBP2/RPS5/LRPPRC/CHAC2/SYNCRIP/MRPL32/POLR2D/PICALM/EIF2B3/GGA3/MRPS7/DPH2/CLN5/DARS1/DPH3/HARS1/EIF2AK2/MRPL3/LARS1/ARL6IP5/DHX29/RPL21/MRPL15/EIF3M/EIF2B1/TMED2/EIF2S2/PTCD3/ABCE1/CASP3/ERAP1/LARP4/MRPL19/LOC106559787/CNOT1/USP16/RPL6/SPCS1/PAIP2B/MRPL43/PCIF1/SLC2A13/MRPL23/LOC100688077/EIF2D/CARS1/EPRS1/IARS2/MRPS35/MRPL47/TRNA…
GO:0045930	negative regulation of mitotic cell cycle	39/1781	92/7709	2.84172e-05	0.000914424	0.000859459	39	FBXO5/MAD2L1BP/MSH2/TTK/EZH2/CLSPN/CASP2/ORC1/GEN1/MRE11/DDIAS/E2F7/ANAPC15/TOPBP1/FAM107A/TRIM35/BUB1B/ZFYVE19/CCND1/TRIP13/TICRR/CDK1/ATF2/ZW10/BRCA1/ZWINT/CDC6/AURKB/EME1/GADD45GIP1/TOM1L1/LCMT1/PLK1/NDC80/PSMG2/FHL1/RFWD3/CRADD/ZNF655
GO:0042770	signal transduction in response to DNA damage	17/1781	29/7709	4.03824e-05	0.00128494	0.0012077	17	CASP2/FOXO3/PAXIP1/E2F7/BRCA2/SPRED1/SESN2/DTL/KDM1A/BRCA1/FOXM1/PRPF19/PLK1/PPM1D/PSMD10/CD74/CRADD
GO:0033047	regulation of mitotic sister chromatid segregation	15/1781	24/7709	4.06446e-05	0.00128494	0.0012077	15	FBXO5/MAD2L1BP/TTK/GEN1/ANAPC15/BUB1B/TRIP13/ZW10/ZWINT/AURKB/PTTG1/LCMT1/PLK1/NDC80/PSMG2
GO:0000077	DNA damage checkpoint	25/1781	51/7709	4.38995e-05	0.00137577	0.00129308	25	DDX39B/MSH2/CLSPN/CASP2/MRE11/CUL4A/TOPBP1/PTPN11/CCND1/HINFP/DTL/H2AX/CDK1/ATF2/USP28/BRCA1/RHNO1/PRPF19/EME1/FEM1B/PLK1/THOC1/FBXO4/RFWD3/CRADD
GO:0043161	proteasome-mediated ubiquitin-dependent protein catabolic process	65/1781	180/7709	4.56652e-05	0.00141226	0.00132737	65	OS9/MAPK9/DESI1/TRIB1/CDC23/VCP/ECRG4/SEC61B/HSPBP1/RAD23B/UBE2J1/CUL1/CUL2/PSMB1/KCTD2/TMUB1/UBXN4/CDC20/STT3B/CUL4A/ANAPC1/HSP90B1/ITCH/EDEM2/PBK/ANAPC7/HERPUD1/ERLIN1/UBE2C/BTRC/DNAJB14/KIF14/PSMB5/PSMD12/UBR3/PSMA7/PSMD2/PSMB4/PSMC5/GID8/CCDC47/TLK2/PSMA6/EDEM3/DNAJC10/ZSWIM8/PSMB6/NEDD4/PSMB3/GBA/SEL1L/PLK1/PSMD10/USP14/FBXO4/SKP2/BFAR/LOC480667/PSMA5/HSPA5/FBXL12/UBE2S/CAMLG/DDIT3/CDC26
GO:0015980	energy derivation by oxidation of organic compounds	41/1781	100/7709	4.58475e-05	0.00141226	0.00132737	41	MTFR2/UQCRQ/NDUFB9/CYC1/IREB2/VCP/CYCS/MDH1/UQCRH/EPM2AIP1/NDUFC2/NDUFA12/SIRT3/SUCLG2/IDH3B/UQCRFS1/GBE1/SUCLG1/PPP1CC/NDUFAF1/CHCHD2/PHKB/NDUFS8/NDUFV1/GSK3B/ISCU/NDUFA10/MTFR1L/PASK/NDUFS2/NDUFS1/IDH3A/PYGM/FH/UQCC3/SDHB/PPP1R3F/PHKG2/INSR/NDUFA7/COX4I1
GO:0006613	cotranslational protein targeting to membrane	11/1781	15/7709	5.19019e-05	0.00158521	0.00148992	11	SRP72/SEC61B/SEC61A1/SRP68/TRAM1/SSR3/SRPRA/SRP54/SRP9/SRP14/SRP19
GO:0007017	microtubule-based process	122/1781	386/7709	5.25635e-05	0.00159192	0.00149624	122	RTTN/AP3S1/KATNA1/TUBB/FBXO5/KIF3A/KIF27/IFT27/HAUS6/CUL7/CUL9/KIF24/DCTN3/VCP/PKHD1/XPO1/RAB1A/GEN1/PLK4/TUBE1/KIF5B/COPG1/DRC1/RSPH6A/CENPA/MAPRE3/CLASP1/MLH1/IFT122/XRCC2/BORA/CDC20/SPRY2/DNAH17/KIF5C/MKKS/TUBGCP3/BRCA2/DCTN6/WDR62/ESPL1/TPX2/KIF20B/KIF3B/FAM107A/CENPJ/WEE1/DYNLRB1/OCLN/RACGAP1/TUBA1C/CKAP5/KNSTRN/ATP2B4/LZTS2/KIF18A/SBDS/CENPE/GSK3B/HAUS2/KIF14/INTS13/AJUBA/ASPM/TBCEL/SPC25/N…
GO:0072594	establishment of protein localization to organelle	63/1781	174/7709	5.4322e-05	0.00162846	0.00153058	63	TNFAIP3/NUP107/UBR5/SAMM50/SRP72/SEC61B/CCT4/MDFIC/SEC61G/VPS41/RUVBL2/SEC61A1/PMPCB/DNAJC15/NUP85/GGA3/SRP68/SEC13/VPS36/BRCA2/RAN/IPO7/TIMM10/TRAM1/SSR3/HERPUD1/HEATR3/CCT5/SRPRA/TIMM17A/CSE1L/TXNIP/TOMM20/KPNA2/SORL1/AP2M1/PEX19/RNF215/SRP54/GOSR2/HK1/NUP88/TIMM17B/NEDD4/SRP9/KPNB1/CCT3/SNF8/TNPO2/DNM2/SNUPN/PMPCA/DNLZ/HSPA5/SPCS3/NXT2/LOC486776/SRP14/HIKESHI/DDIT3/SRP19/PEX12/SPCS2
GO:0045005	DNA-dependent DNA replication maintenance of fidelity	14/1781	22/7709	5.55773e-05	0.00162846	0.00153058	14	MCM9/GEN1/MRE11/FBH1/PCNA/BRCA2/RAD51/NUCKS1/TRAIP/FANCM/EME1/THOC1/RFWD3/OOEP
GO:0045841	negative regulation of mitotic metaphase/anaphase transition	14/1781	22/7709	5.55773e-05	0.00162846	0.00153058	14	FBXO5/MAD2L1BP/TTK/GEN1/ANAPC15/BUB1B/TRIP13/ZW10/ZWINT/AURKB/LCMT1/PLK1/NDC80/PSMG2
GO:1902100	negative regulation of metaphase/anaphase transition of cell cycle	14/1781	22/7709	5.55773e-05	0.00162846	0.00153058	14	FBXO5/MAD2L1BP/TTK/GEN1/ANAPC15/BUB1B/TRIP13/ZW10/ZWINT/AURKB/LCMT1/PLK1/NDC80/PSMG2
GO:0010948	negative regulation of cell cycle process	41/1781	101/7709	6.02102e-05	0.00174998	0.00164479	41	MDM2/FBXO5/MAD2L1BP/TTK/EZH2/CLSPN/CASP2/ORC1/GEN1/MRE11/E2F7/ANAPC15/TOPBP1/FAM107A/BUB1B/ZFYVE19/E2F8/CCND1/TRIP13/TICRR/NEK2/DTL/CDK1/ZW10/BRCA1/ZWINT/CDC6/AURKB/CALR/PTTG1/TOM1L1/LCMT1/TRIM37/PLK1/NDC80/PSMG2/FHL1/RFWD3/CRADD/ZNF655/FGF10
GO:0090110	COPII-coated vesicle cargo loading	9/1781	11/7709	6.38699e-05	0.0018415	0.00173081	9	SEC24A/RAB1A/SEC23B/SEC31A/SEC24B/SEC24D/SEC23A/SAR1A/SEC24C
GO:0035966	response to topologically incorrect protein	27/1781	58/7709	6.94771e-05	0.00198727	0.00186781	27	CANX/ATF4/TMEM33/VCP/CREB3/HERPUD2/HSPA14/STT3B/EIF2AK2/COPS5/TMED2/TMBIM6/HERPUD1/DNAJB14/ERN1/ATF3/TBL2/UFD1/BHLHA15/HSPA2/CREBRF/POMT2/BFAR/PTPN2/HSPA5/DDIT3/HSPA13
GO:0007094	mitotic spindle assembly checkpoint	13/1781	20/7709	7.5217e-05	0.00208525	0.0019599	13	MAD2L1BP/TTK/GEN1/ANAPC15/BUB1B/TRIP13/ZW10/ZWINT/AURKB/LCMT1/PLK1/NDC80/PSMG2
GO:0031577	spindle checkpoint	13/1781	20/7709	7.5217e-05	0.00208525	0.0019599	13	MAD2L1BP/TTK/GEN1/ANAPC15/BUB1B/TRIP13/ZW10/ZWINT/AURKB/LCMT1/PLK1/NDC80/PSMG2
GO:0071173	spindle assembly checkpoint	13/1781	20/7709	7.5217e-05	0.00208525	0.0019599	13	MAD2L1BP/TTK/GEN1/ANAPC15/BUB1B/TRIP13/ZW10/ZWINT/AURKB/LCMT1/PLK1/NDC80/PSMG2
GO:0071174	mitotic spindle checkpoint	13/1781	20/7709	7.5217e-05	0.00208525	0.0019599	13	MAD2L1BP/TTK/GEN1/ANAPC15/BUB1B/TRIP13/ZW10/ZWINT/AURKB/LCMT1/PLK1/NDC80/PSMG2
GO:0045839	negative regulation of mitotic nuclear division	15/1781	25/7709	7.99607e-05	0.00219983	0.00206761	15	FBXO5/MAD2L1BP/TTK/GEN1/ANAPC15/BUB1B/TRIP13/ZW10/ZWINT/AURKB/TOM1L1/LCMT1/PLK1/NDC80/PSMG2
GO:0140013	meiotic nuclear division	32/1781	74/7709	9.19916e-05	0.00251165	0.00236068	32	FBXO5/EHMT2/CKS2/SMC2/MEI4/TTK/MRE11/RAD54L/MLH1/CDC20/BRCA2/PSMD13/ESPL1/MND1/BUB1B/RAD54B/RAD51/KIF18A/TRIP13/SGO2/ASPM/TDRKH/NUF2/FANCM/HSPA2/CCNB2/EME1/CALR/PTTG1/PLK1/FANCA/OOEP
GO:0051028	mRNA transport	19/1781	36/7709	0.000102432	0.00277569	0.00260885	19	NUP107/DDX39B/POLDIP3/SRSF3/HNRNPA2B1/POLR2D/NUP85/SEC13/NSUN2/MCM3AP/SETD2/NUP88/NXF1/EIF5A/DDX39A/THOC1/DDX19B/DDX19A/SARNP
GO:0001510	RNA methylation	16/1781	28/7709	0.00010443	0.00280871	0.00263988	16	MTO1/FBL/THUMPD3/THUMPD2/NSUN2/FTSJ3/RAMAC/NSUN5/NOP2/HSD17B10/MRM2/RBM15/CMTR2/TRMT61A/TRMT61B/TFB2M
GO:0010389	regulation of G2/M transition of mitotic cell cycle	20/1781	39/7709	0.000114315	0.00305179	0.00286835	20	CDK2/FBXO5/CDC25C/CLSPN/ORC1/MRE11/TOPBP1/ZFYVE19/CCND1/KIF14/TICRR/DTL/CDK1/CDC25A/BRCA1/CCNB3/HSPA2/CDC6/FHL1/CDC7
GO:0006412	translation	96/1781	296/7709	0.00011542	0.00305862	0.00287477	96	NARS1/HBS1L/MARS1/VARS1/MRPL13/MRPL55/DAPK1/PUM3/SECISBP2/RPS5/LRPPRC/SYNCRIP/MRPL32/POLR2D/EIF2B3/MRPS7/DPH2/DARS1/DPH3/HARS1/EIF2AK2/MRPL3/LARS1/DHX29/RPL21/MRPL15/EIF3M/EIF2B1/TMED2/EIF2S2/PTCD3/ABCE1/LARP4/MRPL19/LOC106559787/CNOT1/USP16/RPL6/PAIP2B/MRPL43/PCIF1/MRPL23/LOC100688077/EIF2D/CARS1/EPRS1/IARS2/MRPS35/MRPL47/TRNAU1AP/SESN2/METTL5/MTG2/MRPL11/EIF4ENIF1/NSUN5/DHX9/MRPL49/MRPS14/CNOT9…
GO:0045931	positive regulation of mitotic cell cycle	22/1781	45/7709	0.000131717	0.00346502	0.00325674	22	FBXO5/CDC23/CDC25C/MAD2L1BP/RPTOR/CUL4A/BRCA2/TFDP1/PLRG1/ANAPC7/ADAMTS1/PTPN11/UBE2C/CCND1/DTL/CDC25A/KLHL18/HSPA2/RPS6KB1/POLDIP2/CDC7/FGF10
GO:1902749	regulation of cell cycle G2/M phase transition	23/1781	48/7709	0.0001373	0.00358572	0.00337018	23	CDK2/FBXO5/CDC25C/CLSPN/ORC1/MRE11/PAXIP1/CDC25B/TOPBP1/ZFYVE19/CCND1/KIF14/TICRR/DTL/CDK1/CDC25A/BRCA1/CCNB3/HSPA2/CDC6/PLK1/FHL1/CDC7
GO:0035967	cellular response to topologically incorrect protein	25/1781	54/7709	0.000142953	0.00370128	0.0034788	25	CANX/ATF4/TMEM33/VCP/CREB3/HERPUD2/HSPA14/EIF2AK2/COPS5/TMED2/TMBIM6/HERPUD1/DNAJB14/ERN1/ATF3/TBL2/UFD1/BHLHA15/HSPA2/POMT2/BFAR/PTPN2/HSPA5/DDIT3/HSPA13
GO:0045787	positive regulation of cell cycle	49/1781	131/7709	0.000143779	0.00370128	0.0034788	49	MDM2/DDX39B/FBXO5/CDC23/CDC25C/ZNF16/MAD2L1BP/EZH2/TRIM32/CASP2/GEN1/PLK4/MAPRE3/RPTOR/E2F7/CDC25B/CUL4A/BRCA2/TFDP1/CENPJ/RACGAP1/PLRG1/ANAPC7/ADAMTS1/PTPN11/E2F8/UBE2C/CCND1/KIF14/DTL/CDC25A/KLHL18/BRCA1/RHNO1/HSPA2/CDC6/AURKB/CALR/RPS6KB1/PSMD10/INSR/THOC1/NDC80/POLDIP2/CDC7/OOEP/FEN1/CRADD/FGF10
GO:0006900	vesicle budding from membrane	18/1781	34/7709	0.000147894	0.0037536	0.00352798	18	TMED9/SEC24A/RAB1A/PICALM/PREB/SEC13/SEC23B/P2RX7/SEC31A/SEC24B/SEC24D/SEC23A/SAR1A/SEC24C/DNM2/VAPA/SEC16A/SAR1B
GO:1901992	positive regulation of mitotic cell cycle phase transition	18/1781	34/7709	0.000147894	0.0037536	0.00352798	18	FBXO5/CDC23/CDC25C/MAD2L1BP/RPTOR/CUL4A/TFDP1/PLRG1/ANAPC7/ADAMTS1/UBE2C/CCND1/DTL/CDC25A/KLHL18/HSPA2/CDC7/FGF10
GO:0090068	positive regulation of cell cycle process	38/1781	95/7709	0.000160029	0.00403318	0.00379075	38	FBXO5/CDC23/CDC25C/ZNF16/MAD2L1BP/EZH2/CASP2/GEN1/PLK4/RPTOR/E2F7/CDC25B/CUL4A/TFDP1/CENPJ/RACGAP1/PLRG1/ANAPC7/ADAMTS1/E2F8/UBE2C/CCND1/KIF14/DTL/CDC25A/KLHL18/BRCA1/RHNO1/HSPA2/CDC6/AURKB/INSR/NDC80/CDC7/OOEP/FEN1/CRADD/FGF10
GO:0033108	mitochondrial respiratory chain complex assembly	23/1781	49/7709	0.000202778	0.00507507	0.00477002	23	SAMM50/NDUFB2/NDUFAF5/NDUFA2/NDUFAF7/NDUFA12/NDUFAF2/UQCRFS1/NDUFAF6/NDUFAF1/COX17/NDUFS8/NDUFB4/TFAM/NDUFA10/NDUFS2/CCDC56/UQCC3/NDUFB7/SLC25A33/TMEM126A/COA1/SCO1
GO:0036503	ERAD pathway	24/1781	52/7709	0.000205105	0.00509791	0.00479149	24	OS9/VCP/SEC61B/ERLEC1/UBE2J1/TMUB1/UBXN4/STT3B/HSP90B1/EDEM2/HERPUD1/ERLIN1/DNAJB14/CCDC47/EDEM3/DNAJC10/UFD1/POMT2/SEL1L/USP14/UBXN6/LOC480667/HSPA5/RNF139
GO:0034502	protein localization to chromosome	18/1781	35/7709	0.000239232	0.00590544	0.00555047	18	MCM9/VCP/MSH2/TTK/CCT4/EZH2/RUVBL2/CENPA/BRCA2/BUB1B/CCT5/SETD2/ZW10/CCT3/PLK1/NDC80/RPA1/HASPIN
GO:0043043	peptide biosynthetic process	96/1781	302/7709	0.000260839	0.006395	0.00601061	96	NARS1/HBS1L/MARS1/VARS1/MRPL13/MRPL55/DAPK1/PUM3/SECISBP2/RPS5/LRPPRC/SYNCRIP/MRPL32/POLR2D/EIF2B3/MRPS7/DPH2/DARS1/DPH3/HARS1/EIF2AK2/MRPL3/LARS1/DHX29/RPL21/MRPL15/EIF3M/EIF2B1/TMED2/EIF2S2/PTCD3/ABCE1/LARP4/MRPL19/LOC106559787/CNOT1/USP16/RPL6/PAIP2B/MRPL43/PCIF1/MRPL23/LOC100688077/EIF2D/CARS1/EPRS1/IARS2/MRPS35/MRPL47/TRNAU1AP/SESN2/METTL5/MTG2/MRPL11/EIF4ENIF1/NSUN5/DHX9/MRPL49/MRPS14/CNOT9…
GO:0022904	respiratory electron transport chain	20/1781	41/7709	0.0002749	0.00669418	0.0062918	20	UQCRQ/NDUFB9/CYC1/CYCS/UQCRH/NDUFC2/NDUFA12/UQCRFS1/NDUFAF1/CHCHD2/NDUFS8/NDUFV1/ISCU/NDUFA10/NDUFS2/NDUFS1/UQCC3/SDHB/NDUFA7/COX4I1
GO:0043603	cellular amide metabolic process	142/1781	476/7709	0.000278818	0.00674403	0.00633866	142	SEC11C/NARS1/HBS1L/MARS1/CLIC1/VARS1/NEU1/MRPL13/MRPL55/DAPK1/ATF4/PUM3/SECISBP2/RPS5/LRPPRC/PPCS/CHAC2/SYNCRIP/MRPL32/NAPEPLD/POLR2D/PICALM/EIF2B3/GGA3/MRPS7/DPH2/CLN5/DARS1/OXSM/DPH3/HARS1/EIF2AK2/MRPL3/LARS1/ARL6IP5/SUCLG2/DHX29/RPL21/PLPP1/MRPL15/PDHB/EIF3M/EIF2B1/TMED2/EIF2S2/PTCD3/ABCE1/CASP3/ERAP1/LARP4/MRPL19/LOC106559787/P2RX7/CNOT1/USP16/RPL6/SPCS1/PAIP2B/MRPL43/PCIF1/SLC2A13/MRPL23/LOC…
GO:0051225	spindle assembly	24/1781	53/7709	0.000293699	0.00698118	0.00656155	24	FBXO5/HAUS6/MAPRE3/CLASP1/MLH1/CDC20/TPX2/KIF3B/RACGAP1/LZTS2/HAUS2/AJUBA/ASPM/NEK2/SAC3D1/HAUS3/HAUS8/CCNB2/KIF4A/HAUS1/PLK1/STAG2/HAUS7/DRG1
GO:0006986	response to unfolded protein	23/1781	50/7709	0.000294336	0.00698118	0.00656155	23	CANX/ATF4/TMEM33/CREB3/HERPUD2/HSPA14/STT3B/EIF2AK2/COPS5/TMED2/TMBIM6/HERPUD1/ERN1/ATF3/TBL2/BHLHA15/HSPA2/CREBRF/BFAR/PTPN2/HSPA5/DDIT3/HSPA13
GO:0006301	postreplication repair	11/1781	17/7709	0.000294434	0.00698118	0.00656155	11	POLH/VCP/MSH2/RAD18/PCNA/SPRTN/DTL/BRCA1/POLDIP2/UBE2V2/PCLAF
GO:0043039	tRNA aminoacylation	16/1781	30/7709	0.000309019	0.00727913	0.00684159	16	NARS1/MARS1/VARS1/DARS1/HARS1/LARS1/CARS1/EPRS1/IARS2/FARSB/RARS1/FARSA/TARS1/SARS1/AARS1/GATC
GO:0071103	DNA conformation change	34/1781	85/7709	0.00034808	0.00814598	0.00765633	34	BRD2/HMGA1/PHF2/SMC2/GRWD1/SOX9/MCM6/NCAPH/HMGB1/MCM4/SMARCA5/HMGB2/HELLS/MIS18A/RAD51/SPTY2D1/NCAPD3/NAP1L4/HAT1/H4-16/H4C8/DHX9/HIRA/HP1BP3/NCAPD2/MNAT1/DDX11/TOP2A/TP53/TOP3A/RPA1/NOC2L/H2BU1/H1-4
GO:0043604	amide biosynthetic process	109/1781	353/7709	0.000357721	0.00831759	0.00781763	109	NARS1/HBS1L/MARS1/VARS1/MRPL13/MRPL55/DAPK1/PUM3/SECISBP2/RPS5/LRPPRC/PPCS/SYNCRIP/MRPL32/POLR2D/EIF2B3/MRPS7/DPH2/DARS1/DPH3/HARS1/EIF2AK2/MRPL3/LARS1/DHX29/RPL21/MRPL15/PDHB/EIF3M/EIF2B1/TMED2/EIF2S2/PTCD3/ABCE1/LARP4/MRPL19/LOC106559787/P2RX7/CNOT1/USP16/RPL6/PAIP2B/MRPL43/PCIF1/MRPL23/LOC100688077/PM20D1/EIF2D/CARS1/EPRS1/IARS2/MRPS35/ACACB/MRPL47/TRNAU1AP/SESN2/METTL5/MTG2/MRPL11/EIF4ENIF1/N…
GO:0032527	protein exit from endoplasmic reticulum	14/1781	25/7709	0.000379226	0.00876109	0.00823447	14	OS9/VCP/SEC61B/ERLEC1/UBE2J1/PREB/SEC13/TM9SF4/EDEM2/HERPUD1/SORL1/UFD1/SEC16A/SAR1B
GO:0070647	protein modification by small protein conjugation or removal	112/1781	365/7709	0.000388629	0.00892114	0.00838491	112	OS9/TNFAIP3/USP15/MAPK9/MDM2/FBXO5/UBR5/TULP4/DCAF13/FBXO32/DESI1/CDC23/JOSD1/PLAA/CUL7/CUL9/SH3RF3/VCP/UBE2M/U2AF2/HSPBP1/UBE2J1/CUL1/TRIM32/USP38/CUL2/SAE1/PAXIP1/FBH1/SPRY2/RAD18/CUL4A/UBA3/TRIM44/ANAPC1/FAM107A/PCGF5/UBA2/COPS5/MARCHF5/ITCH/RNF7/TRPC4AP/RNF13/ANAPC7/USP16/TRIM35/HERPUD1/UBE2C/PRMT3/BTRC/WSB2/UBE3A/UCHL5/SPATA2/SPRTN/KLHL24/NEDD8/DTL/SUMO1/SENP5/KLHL18/RELA/KDM1A/LOC480043/USP…
GO:0009124	nucleoside monophosphate biosynthetic process	10/1781	15/7709	0.000397012	0.00899895	0.00845803	10	PPAT/CAD/UMPS/UCKL1/ATIC/PFAS/PRPS1/HPRT1/APRT/NUDT2
GO:0009156	ribonucleoside monophosphate biosynthetic process	10/1781	15/7709	0.000397012	0.00899895	0.00845803	10	PPAT/CAD/UMPS/UCKL1/ATIC/PFAS/PRPS1/HPRT1/APRT/NUDT2
GO:0006418	tRNA aminoacylation for protein translation	15/1781	28/7709	0.000447284	0.0100751	0.00946948	15	NARS1/MARS1/VARS1/DARS1/HARS1/LARS1/CARS1/EPRS1/IARS2/FARSB/RARS1/FARSA/TARS1/SARS1/AARS1
GO:0009060	aerobic respiration	16/1781	31/7709	0.00050273	0.0111842	0.0105119	16	MTFR2/IREB2/VCP/CYCS/MDH1/UQCRH/SIRT3/SUCLG2/IDH3B/SUCLG1/NDUFS8/MTFR1L/IDH3A/FH/SDHB/COX4I1
GO:0043038	amino acid activation	16/1781	31/7709	0.00050273	0.0111842	0.0105119	16	NARS1/MARS1/VARS1/DARS1/HARS1/LARS1/CARS1/EPRS1/IARS2/FARSB/RARS1/FARSA/TARS1/SARS1/AARS1/GATC
GO:0006298	mismatch repair	9/1781	13/7709	0.000523763	0.0115806	0.0108845	9	MCM9/MSH2/MLH1/PCNA/TDG/PMS1/SETD2/EXO1/RPA1
GO:0030968	endoplasmic reticulum unfolded protein response	17/1781	34/7709	0.000545298	0.0119832	0.0112629	17	CANX/ATF4/TMEM33/CREB3/HERPUD2/EIF2AK2/COPS5/TMED2/HERPUD1/ERN1/ATF3/TBL2/BHLHA15/BFAR/PTPN2/HSPA5/DDIT3
GO:0010212	response to ionizing radiation	24/1781	55/7709	0.000576152	0.0125846	0.0118281	24	XRCC6/MYC/MSH2/RAD54L/XRCC2/PAXIP1/BRCA2/TOPBP1/BCL2L1/XRCC4/RAD54B/RAD51/NUCKS1/TICRR/TLK2/KDM1A/USP28/CRYAB/BRCA1/RHNO1/FBXO4/STK11/RFWD3/GTF2H5
GO:0061982	meiosis I cell cycle process	23/1781	52/7709	0.000590979	0.0128307	0.0120594	23	FBXO5/EHMT2/CDC25C/CKS2/MEI4/MRE11/RAD54L/MLH1/BRCA2/PSMD13/ESPL1/MND1/RAD54B/RAD51/TRIP13/SGO2/CDC25A/FANCM/HSPA2/CCNB2/EME1/PTTG1/PLK1
GO:0030433	ubiquitin-dependent ERAD pathway	19/1781	40/7709	0.000595062	0.0128419	0.01207	19	OS9/VCP/SEC61B/UBE2J1/TMUB1/UBXN4/STT3B/HSP90B1/EDEM2/HERPUD1/ERLIN1/DNAJB14/CCDC47/EDEM3/DNAJC10/SEL1L/USP14/LOC480667/HSPA5
GO:0090329	regulation of DNA-dependent DNA replication	15/1781	29/7709	0.000730169	0.0155941	0.0146568	15	CDK2/FBXO5/DSCC1/FBH1/E2F7/PCNA/RFC3/BRCA2/E2F8/RFC5/GMNN/TICRR/RFC4/METTL4/CDC7
GO:0006399	tRNA metabolic process	34/1781	88/7709	0.000735571	0.0155941	0.0146568	34	NARS1/MARS1/POP1/VARS1/C1H9orf64/MTO1/DDX1/PUS7/DARS1/THUMPD3/DPH3/HARS1/LARS1/THUMPD2/CARS1/NSUN2/EPRS1/IARS2/SSB/PRORP/POP7/FARSB/HSD17B10/RARS1/FARSA/TARS1/SARS1/AARS1/URM1/TRMT61A/GATC/RPP30/TRMT61B/OSGEP
GO:2001020	regulation of response to DNA damage stimulus	34/1781	88/7709	0.000735571	0.0155941	0.0146568	34	ARMT1/DDX39B/FBXO5/UBR5/MYC/HNRNPK/CYREN/TRIM32/DDIAS/PAXIP1/FBH1/PCNA/CUL4A/PARPBP/CEBPG/SPRED1/RAD51/DHX9/KDM1A/SETD2/BRCA1/FOXM1/RAD52/PPP4C/FEM1B/PSMD10/CD74/THOC1/FBXO4/USP1/RMI2/RFWD3/OOEP/FGF10
GO:0016579	protein deubiquitination	25/1781	59/7709	0.000758845	0.0159934	0.0150321	25	TNFAIP3/USP15/JOSD1/VCP/USP38/COPS5/USP16/UCHL5/SPATA2/USP28/ATXN7L3/USP11/OTUD3/USP42/USP18/MINDY2/EPOP/USP3/TNIP1/USP14/USP1/USP20/USP33/USP4/UCHL3
GO:0051298	centrosome duplication	16/1781	32/7709	0.000791767	0.0165903	0.0155931	16	RTTN/PKHD1/XPO1/GEN1/PLK4/BRCA2/WDR62/CENPJ/CKAP5/SAC3D1/CEP152/KIAA0753/TRIM37/NDC80/SASS6/USP33
GO:0051293	establishment of spindle localization	10/1781	16/7709	0.000839801	0.0173536	0.0163105	10	PKHD1/CENPA/CLASP1/SPRY2/ZW10/HTT/PLK1/NDC80/OOEP/FGF10
GO:0007088	regulation of mitotic nuclear division	22/1781	50/7709	0.000842824	0.0173536	0.0163105	22	FBXO5/CDC23/CUL7/CUL9/MAD2L1BP/TTK/GEN1/BORA/ANAPC15/KIF20B/ANAPC7/BUB1B/TRIP13/ZW10/ZWINT/AURKB/TOM1L1/LCMT1/PLK1/INSR/NDC80/PSMG2
GO:0051052	regulation of DNA metabolic process	47/1781	133/7709	0.000856286	0.0173536	0.0163105	47	CDK2/UBR5/DSCC1/MYC/MSH2/CCT4/CYREN/MRE11/MLH1/PAXIP1/FBH1/PCNA/RFC3/CUL4A/TFDP1/HMGB1/PARPBP/PARP4/CEBPG/MIS18A/RAD51/RFC5/CCT5/NUCKS1/STN1/TICRR/NEK2/DHX9/KDM1A/SETD2/RFC4/BRCA1/FOXM1/RAD52/CCT3/PPP4C/SLX1A/THOC1/FBXO4/USP1/SUB1/RMI2/OOEP/HNRNPD/H1-4/MAP2K7/FGF10
GO:0071824	protein-DNA complex subunit organization	35/1781	92/7709	0.000860617	0.0173536	0.0163105	35	BRD2/TAF11/GRWD1/CENPO/TBP/SOX9/CENPA/MCM6/PSMC4/MCM4/CENPK/SMARCA5/HMGB2/HELLS/MIS18A/RAD51/SPTY2D1/NAP1L4/GMNN/MCM3AP/PSMC5/HAT1/H4-16/H4C8/SETD2/HIRA/HP1BP3/DLGAP5/RAD52/CENPN/DR1/H2BU1/CENPW/H1-4/GTF2H5
GO:0006275	regulation of DNA replication	21/1781	47/7709	0.000860785	0.0173536	0.0163105	21	CDK2/FBXO5/EHMT2/DSCC1/CCNA2/FBH1/E2F7/PCNA/RFC3/BRCA2/E2F8/RFC5/NUCKS1/GMNN/STN1/TICRR/DHX9/RFC4/METTL4/CDC7/OBI1
GO:0034620	cellular response to unfolded protein	21/1781	47/7709	0.000860785	0.0173536	0.0163105	21	CANX/ATF4/TMEM33/CREB3/HERPUD2/HSPA14/EIF2AK2/COPS5/TMED2/TMBIM6/HERPUD1/ERN1/ATF3/TBL2/BHLHA15/HSPA2/BFAR/PTPN2/HSPA5/DDIT3/HSPA13
GO:0009411	response to UV	28/1781	69/7709	0.000861903	0.0173536	0.0163105	28	POLH/XPA/MSH2/TRIM32/RUVBL2/RAD18/PCNA/BRCA2/MAP4K3/PBK/PPID/TP53INP1/CCND1/CASP7/SPRTN/DTL/CDC25A/RELA/KDM1A/USP28/IL12A/RHNO1/NEDD4/EIF2S1/USP1/NOC2L/STK11/MAP2K7
GO:0022900	electron transport chain	20/1781	44/7709	0.000871033	0.0173543	0.0163111	20	UQCRQ/NDUFB9/CYC1/CYCS/UQCRH/NDUFC2/NDUFA12/UQCRFS1/NDUFAF1/CHCHD2/NDUFS8/NDUFV1/ISCU/NDUFA10/NDUFS2/NDUFS1/UQCC3/SDHB/NDUFA7/COX4I1
GO:0072331	signal transduction by p53 class mediator	19/1781	41/7709	0.000871567	0.0173543	0.0163111	19	HNRNPK/MSH2/CASP2/FOXO3/PAXIP1/E2F7/BRCA2/RRS1/SPRED1/SESN2/KDM1A/USP28/FOXM1/PPM1D/PSMD10/CD74/STK11/TRIM24/CRADD
GO:0033044	regulation of chromosome organization	41/1781	113/7709	0.000991233	0.0196286	0.0184487	41	FBXO5/MYC/CDC23/MAD2L1BP/PHF2/TTK/CCT4/GEN1/RUVBL2/MRE11/PAXIP1/ANAPC15/ANAPC1/RIOK2/ANAPC7/BUB1B/UBE2C/CCT5/STN1/TRIP13/NEK2/KDM1A/ZW10/BRCA1/ZWINT/MNAT1/CDC6/CCT3/AURKB/SLX1A/PTTG1/LCMT1/PLK1/NDC80/FBXO4/PSMG2/RMI2/HNRNPD/FEN1/CDC26/MAP2K7
GO:0071897	DNA biosynthetic process	25/1781	60/7709	0.0010197	0.0200819	0.0188748	25	DSCC1/MYC/POLH/VCP/CCT4/TK1/PCNA/RFC3/TFDP1/PARP4/RFC5/CCT5/STN1/TERT/SPRTN/NEK2/DTL/RFC4/CCT3/FBXO4/POLDIP2/RPA1/HNRNPD/PCLAF/MAP2K7
GO:0007050	cell cycle arrest	23/1781	54/7709	0.00111908	0.0218387	0.020526	23	MDM2/MSH2/CASP2/DDIAS/PPM1G/TP53INP1/CCND1/ERN1/GAS2L1/IL12A/BRCA1/CDKN3/FOXM1/GADD45GIP1/CALR/PRR11/STK11/SLC25A33/AK1/CDKN2C/DDIT3/CRADD/FGF10
GO:0070646	protein modification by small protein removal	28/1781	70/7709	0.00112499	0.0218387	0.020526	28	TNFAIP3/USP15/DESI1/JOSD1/VCP/USP38/COPS5/USP16/UCHL5/SPATA2/SENP5/USP28/ATXN7L3/USP11/OTUD3/USP42/USP18/MINDY2/EPOP/USP3/TNIP1/USP14/USP1/USP20/USP33/USP4/UCHL3/COPS8
GO:1901976	regulation of cell cycle checkpoint	11/1781	19/7709	0.0011276	0.0218387	0.020526	11	DDX39B/MAD2L1BP/GEN1/ANAPC15/CUL4A/FEM1B/LCMT1/THOC1/NDC80/FBXO4/RFWD3
GO:0071826	ribonucleoprotein complex subunit organization	37/1781	100/7709	0.00113648	0.0218387	0.020526	37	DDX39B/SNRPC/PUF60/VCP/RPS5/PRPF31/LUC7L2/KIF5B/RUVBL1/POLR2D/MRPS7/CLNS1A/CELF2/CRNKL1/SHQ1/RRS1/EIF3M/EIF2S2/SMN/RPL6/SCAF11/EIF2D/PRMT5/RAMAC/DHX9/SNRPD3/LSM4/PRPF19/GEMIN5/DICER1/SNRPD1/EIF5/ERAL1/YJU2/MRPL20/SETX/USP4
GO:0010257	NADH dehydrogenase complex assembly	15/1781	30/7709	0.00115132	0.0218387	0.020526	15	NDUFB2/NDUFAF5/NDUFA2/NDUFAF7/NDUFA12/NDUFAF2/NDUFAF6/NDUFAF1/NDUFS8/NDUFB4/NDUFA10/NDUFS2/NDUFB7/TMEM126A/COA1
GO:0032981	mitochondrial respiratory chain complex I assembly	15/1781	30/7709	0.00115132	0.0218387	0.020526	15	NDUFB2/NDUFAF5/NDUFA2/NDUFAF7/NDUFA12/NDUFAF2/NDUFAF6/NDUFAF1/NDUFS8/NDUFB4/NDUFA10/NDUFS2/NDUFB7/TMEM126A/COA1
GO:0051784	negative regulation of nuclear division	15/1781	30/7709	0.00115132	0.0218387	0.020526	15	FBXO5/MAD2L1BP/TTK/GEN1/ANAPC15/BUB1B/TRIP13/ZW10/ZWINT/AURKB/TOM1L1/LCMT1/PLK1/NDC80/PSMG2
GO:0040001	establishment of mitotic spindle localization	9/1781	14/7709	0.00116605	0.0220022	0.0206797	9	PKHD1/CENPA/CLASP1/SPRY2/ZW10/HTT/PLK1/NDC80/FGF10
GO:0090305	nucleic acid phosphodiester bond hydrolysis	20/1781	45/7709	0.00123186	0.0231231	0.0217332	20	POP1/UTP23/RRP36/XPA/MEI4/XRN2/FBH1/POLR2I/ERI1/BMS1/RRS1/CPSF2/ERN1/POP7/ZC3H12C/DICER1/EDC3/DFFB/EDC4/RPP30
GO:0051783	regulation of nuclear division	25/1781	61/7709	0.00135464	0.025296	0.0237755	25	FBXO5/CDC23/CUL7/CUL9/MAD2L1BP/TTK/GEN1/BORA/CDC20/ANAPC15/KIF20B/ANAPC7/BUB1B/TRIP13/ZW10/ZWINT/AURKB/CALR/TOM1L1/LCMT1/PLK1/INSR/NDC80/PSMG2/OOEP
GO:0051640	organelle localization	65/1781	201/7709	0.00152395	0.028311	0.0266092	65	AP3S1/TMED9/LTV1/CDC23/MYH9/PKHD1/TMEM106B/XPO1/RAB1A/CDCA8/KIF5B/COPG1/CENPA/NECTIN2/PREB/CLASP1/MLH1/SPRY2/KIF5C/RAN/ARMC1/RRS1/ESYT3/ABCE1/CCNB1/RIOK2/ATP2A2/USO1/EXOC6B/KIF18A/KIF14/INTS13/MFN1/ASPM/NUDC/VPS11/ARCN1/PARD3B/NUF2/ZW10/MOSPD3/PDCD10/HTT/RAB3A/DLGAP5/BHLHA15/STX5/NUP88/RAB8A/KIF22/CLN3/RAB3D/DNM2/PLK1/NDC80/RHOT1/CLUH/STK11/SEC16A/SPOUT1/OOEP/AP3S2/SAR1B/RAB11B/FGF10
GO:0051383	kinetochore organization	8/1781	12/7709	0.00159605	0.0293477	0.0275836	8	SMC2/CENPA/CENPK/NUF2/DLGAP5/NDC80/CENPN/CENPW
GO:1902751	positive regulation of cell cycle G2/M phase transition	8/1781	12/7709	0.00159605	0.0293477	0.0275836	8	FBXO5/CDC25C/CDC25B/CCND1/DTL/CDC25A/HSPA2/CDC7
GO:0051653	spindle localization	10/1781	17/7709	0.0016189	0.0296168	0.0278366	10	PKHD1/CENPA/CLASP1/SPRY2/ZW10/HTT/PLK1/NDC80/OOEP/FGF10
GO:0044774	mitotic DNA integrity checkpoint	14/1781	28/7709	0.00167696	0.0305241	0.0286893	14	MSH2/CLSPN/CASP2/ORC1/MRE11/TOPBP1/CCND1/TICRR/CDK1/ATF2/CDC6/EME1/RFWD3/CRADD
GO:0042274	ribosomal small subunit biogenesis	18/1781	40/7709	0.00179785	0.03256	0.0306029	18	LTV1/DCAF13/UTP23/BYSL/RRP36/RPS5/MRPS7/BMS1/RRS1/RIOK2/WDR3/HEATR1/NGDN/NOP14/TSR2/RIOK3/ERAL1/GTF2H5
GO:0006520	cellular amino acid metabolic process	42/1781	120/7709	0.00194695	0.035084	0.0329752	42	NARS1/CDO1/MARS1/VARS1/ATF4/PSAT1/MTAP/MMUT/HIBADH/CAD/DARS1/HARS1/LARS1/APIP/MCCC2/ALDH18A1/GOT2/ENOPH1/ATP2B4/LOC476602/PSPH/PM20D1/CARS1/EPRS1/IARS2/LOC477562/QDPR/FARSB/HSD17B10/ARG2/PFAS/RARS1/FARSA/CLN3/NOS2/TARS1/BLMH/ABAT/SARS1/AARS1/PHGDH/GATC
GO:0007080	mitotic metaphase plate congression	11/1781	20/7709	0.00198606	0.0356107	0.0334702	11	CDC23/CDCA8/RRS1/CCNB1/KIF18A/KIF14/NUDC/NUF2/ZW10/KIF22/NDC80
GO:0000054	ribosomal subunit export from nucleus	7/1781	10/7709	0.00213284	0.0374964	0.0352426	7	LTV1/XPO1/RAN/RRS1/ABCE1/RIOK2/NUP88
GO:0033750	ribosome localization	7/1781	10/7709	0.00213284	0.0374964	0.0352426	7	LTV1/XPO1/RAN/RRS1/ABCE1/RIOK2/NUP88
GO:0071428	rRNA-containing ribonucleoprotein complex export from nucleus	7/1781	10/7709	0.00213284	0.0374964	0.0352426	7	LTV1/XPO1/RAN/RRS1/ABCE1/RIOK2/NUP88
GO:0090502	RNA phosphodiester bond hydrolysis, endonucleolytic	7/1781	10/7709	0.00213284	0.0374964	0.0352426	7	POP1/UTP23/BMS1/RRS1/POP7/ZC3H12C/RPP30
GO:0007127	meiosis I	21/1781	50/7709	0.00223769	0.0391487	0.0367955	21	FBXO5/EHMT2/CKS2/MEI4/MRE11/RAD54L/MLH1/BRCA2/PSMD13/ESPL1/MND1/RAD54B/RAD51/TRIP13/SGO2/FANCM/HSPA2/CCNB2/EME1/PTTG1/PLK1
GO:0009161	ribonucleoside monophosphate metabolic process	12/1781	23/7709	0.00225991	0.0393464	0.0369813	12	PPAT/CAD/XDH/UMPS/UCKL1/ATIC/PFAS/PRPS1/HPRT1/APRT/AK1/NUDT2
GO:0006270	DNA replication initiation	9/1781	15/7709	0.0023196	0.0401914	0.0377756	9	CDK2/ORC1/MCM6/ORC4/TOPBP1/MCM4/TICRR/CDC45/CDC6
GO:0006605	protein targeting	40/1781	114/7709	0.00233774	0.040312	0.0378889	40	SAMM50/ZDHHC21/SRP72/SEC61B/ITGB1BP1/SEC61G/TCAF2/VPS41/SEC61A1/PMPCB/DNAJC15/GGA3/SRP68/TIMM10/TRAM1/SSR3/HERPUD1/SRPRA/TIMM17A/ZDHHC6/TOMM20/SORL1/PEX19/ZDHHC24/RNF215/SRP54/GOSR2/RTP4/TIMM17B/NEDD4/SRP9/PMPCA/DNLZ/HSPA5/SPCS3/LOC486776/SRP14/SRP19/PEX12/SPCS2
GO:0006914	autophagy	54/1781	164/7709	0.00237146	0.0405059	0.0380712	54	ATG12/EHMT2/DAPK1/PLAA/VCP/XPA/STX17/RAB1A/VPS41/FOXO3/PIP4K2A/ATG16L2/RPTOR/STING1/FEZ2/HMGB1/TMEM41B/MAP1LC3A/TMEM150A/MTMR9/TMBIM6/ATP2A2/ATG13/AMBRA1/TP53INP1/TEX264/NPRL2/CISD2/TMEM39A/HTR2B/SESN2/PARL/VPS11/SCFD1/FUNDC1/HTT/RETREG3/ATG9A/RAB8A/GBA/CLN3/CDC37/TRAPPC8/POLDIP2/ATG4C/CLEC16A/UBXN6/TMEM59/STK11/SEC16A/GNAI3/USP33/TRIM68/ORMDL3
GO:0061919	process utilizing autophagic mechanism	54/1781	164/7709	0.00237146	0.0405059	0.0380712	54	ATG12/EHMT2/DAPK1/PLAA/VCP/XPA/STX17/RAB1A/VPS41/FOXO3/PIP4K2A/ATG16L2/RPTOR/STING1/FEZ2/HMGB1/TMEM41B/MAP1LC3A/TMEM150A/MTMR9/TMBIM6/ATP2A2/ATG13/AMBRA1/TP53INP1/TEX264/NPRL2/CISD2/TMEM39A/HTR2B/SESN2/PARL/VPS11/SCFD1/FUNDC1/HTT/RETREG3/ATG9A/RAB8A/GBA/CLN3/CDC37/TRAPPC8/POLDIP2/ATG4C/CLEC16A/UBXN6/TMEM59/STK11/SEC16A/GNAI3/USP33/TRIM68/ORMDL3
GO:0006487	protein N-linked glycosylation	13/1781	26/7709	0.00244734	0.040615	0.0381737	13	SRD5A3/UBE2J1/RPN1/STT3B/ALG5/RPN2/STT3A/DPAGT1/MGAT2/DDOST/KRTCAP2/MAGT1/DOLPP1
GO:0030490	maturation of SSU-rRNA	13/1781	26/7709	0.00244734	0.040615	0.0381737	13	DCAF13/UTP23/BYSL/BMS1/RRS1/RIOK2/WDR3/HEATR1/NGDN/NOP14/TSR2/RIOK3/GTF2H5
GO:0065002	intracellular protein transmembrane transport	13/1781	26/7709	0.00244734	0.040615	0.0381737	13	SEC61B/SEC61G/SEC61A1/DNAJC15/TRAM1/TIMM17A/TOMM20/SRP54/TIMM17B/DNLZ/HSPA5/LOC486776/PEX12
GO:0090501	RNA phosphodiester bond hydrolysis	13/1781	26/7709	0.00244734	0.040615	0.0381737	13	POP1/UTP23/RRP36/POLR2I/ERI1/BMS1/RRS1/CPSF2/ERN1/POP7/ZC3H12C/DICER1/RPP30
GO:0000375	RNA splicing, via transesterification reactions	52/1781	157/7709	0.00245673	0.040615	0.0381737	52	TXNL4A/DDX39B/PHF5A/SNRPC/HNRNPK/PUF60/SRSF3/U2AF2/PRPF31/HNRNPA2B1/PRPF38A/SF3B6/LUC7L2/WBP4/CLNS1A/CELF2/SNRPA/RBM17/CRNKL1/SNRPB2/SMN/PLRG1/SRSF6/SCAF11/CWF19L1/SRSF9/SNRPA1/NCL/PRMT5/SF3B2/DHX9/BUD13/RBM7/SNRPD3/LSM4/DDX39A/PRPF19/NONO/GEMIN5/SNRPD1/HNRNPM/YJU2/LSM7/DAZAP1/RBM15/SETX/SF3B3/TXNL4B/DHX38/HTATSF1/USP4/RBM11
GO:0000377	RNA splicing, via transesterification reactions with bulged adenosine as nucleophile	52/1781	157/7709	0.00245673	0.040615	0.0381737	52	TXNL4A/DDX39B/PHF5A/SNRPC/HNRNPK/PUF60/SRSF3/U2AF2/PRPF31/HNRNPA2B1/PRPF38A/SF3B6/LUC7L2/WBP4/CLNS1A/CELF2/SNRPA/RBM17/CRNKL1/SNRPB2/SMN/PLRG1/SRSF6/SCAF11/CWF19L1/SRSF9/SNRPA1/NCL/PRMT5/SF3B2/DHX9/BUD13/RBM7/SNRPD3/LSM4/DDX39A/PRPF19/NONO/GEMIN5/SNRPD1/HNRNPM/YJU2/LSM7/DAZAP1/RBM15/SETX/SF3B3/TXNL4B/DHX38/HTATSF1/USP4/RBM11
GO:0000398	mRNA splicing, via spliceosome	52/1781	157/7709	0.00245673	0.040615	0.0381737	52	TXNL4A/DDX39B/PHF5A/SNRPC/HNRNPK/PUF60/SRSF3/U2AF2/PRPF31/HNRNPA2B1/PRPF38A/SF3B6/LUC7L2/WBP4/CLNS1A/CELF2/SNRPA/RBM17/CRNKL1/SNRPB2/SMN/PLRG1/SRSF6/SCAF11/CWF19L1/SRSF9/SNRPA1/NCL/PRMT5/SF3B2/DHX9/BUD13/RBM7/SNRPD3/LSM4/DDX39A/PRPF19/NONO/GEMIN5/SNRPD1/HNRNPM/YJU2/LSM7/DAZAP1/RBM15/SETX/SF3B3/TXNL4B/DHX38/HTATSF1/USP4/RBM11
GO:0006091	generation of precursor metabolites and energy	55/1781	168/7709	0.00250591	0.0409551	0.0384934	55	MTFR2/UQCRQ/NDUFB9/CYC1/IREB2/VCP/MSH2/CYCS/MDH1/UQCRH/EPM2AIP1/NDUFC2/ATP5F1C/NDUFA12/SIRT3/SUCLG2/IDH3B/UQCRFS1/GBE1/SUCLG1/P2RX7/PPP1CC/NDUFAF1/CHCHD2/PHKB/NDUFS8/NDUFV1/GSK3B/ISCU/NDUFA10/MTFR1L/PASK/NDUFS2/NDUFS1/HK1/IDH3A/PYGM/TPI1/COX8A/FH/UQCC3/SDHB/PPP1R3F/PHKG2/LOC100683724/COX5A/INSR/TEFM/NDUFA7/ABCD1/H6PD/SLC25A33/COX4I1/ATP5PO/COX7A2L
GO:0022618	ribonucleoprotein complex assembly	35/1781	97/7709	0.00250704	0.0409551	0.0384934	35	DDX39B/SNRPC/PUF60/RPS5/PRPF31/LUC7L2/RUVBL1/POLR2D/MRPS7/CLNS1A/CELF2/CRNKL1/SHQ1/RRS1/EIF3M/EIF2S2/SMN/RPL6/SCAF11/EIF2D/PRMT5/RAMAC/DHX9/SNRPD3/LSM4/PRPF19/GEMIN5/DICER1/SNRPD1/EIF5/ERAL1/YJU2/MRPL20/SETX/USP4
GO:1903008	organelle disassembly	18/1781	41/7709	0.00252276	0.0409551	0.0384934	18	ATG12/VCP/KIF5B/STING1/MAP1LC3A/ATG13/AMBRA1/TEX264/CISD2/PARL/KIF9/FUNDC1/HTT/RETREG3/ATG9A/STX5/GBA/CDC37
GO:2001251	negative regulation of chromosome organization	18/1781	41/7709	0.00252276	0.0409551	0.0384934	18	FBXO5/MAD2L1BP/PHF2/TTK/GEN1/ANAPC15/BUB1B/STN1/TRIP13/ZW10/ZWINT/MNAT1/AURKB/PTTG1/LCMT1/PLK1/NDC80/PSMG2

## Sheet: module_chocolate2
TABLE S3. Complete results of functional enrichment analyses.
Term ID	Description	GeneRatio	BgRatio	pvalue	p.adjust	qvalue	Count	Gene IDs
GO:0006325	chromatin organization	32/373	280/7709	4.4411e-06	0.00624867	0.00624867	32	BAG6/DAXX/UBR2/EPC1/IWS1/RSF1/KAT6A/NSD3/EP400/ERCC6/KDM3A/ING2/TASOR/CHD6/INO80/BAP1/CHD2/RCOR3/MORC2/BAZ1A/SMARCB1/ATM/KDM6A/MAP1S/TRRAP/OGT/ATRX/SREBF1/NIPBL/FMR1/UBN1/SETDB1
GO:1902275	regulation of chromatin organization	13/373	61/7709	5.1093e-06	0.00624867	0.00624867	13	IWS1/NSD3/KDM3A/ING2/TASOR/MORC2/MAP1S/OGT/ATRX/SREBF1/NIPBL/FMR1/SETDB1
GO:1905269	positive regulation of chromatin organization	9/373	33/7709	1.80774e-05	0.0147391	0.0147391	9	NSD3/ING2/TASOR/MORC2/OGT/SREBF1/NIPBL/FMR1/SETDB1
GO:0051276	chromosome organization	43/373	472/7709	3.66492e-05	0.022411	0.022411	43	BAG6/DAXX/UBR2/SMC5/SENP6/EPC1/IWS1/RSF1/KAT6A/NSD3/EP400/ERCC6/TNKS/NAT10/KDM3A/ING2/TASOR/KATNB1/CHD6/INO80/BAP1/CHD2/SUN1/ACIN1/RCOR3/NUP133/MORC2/BAZ1A/SMARCB1/ATM/KDM6A/MAP1S/TRRAP/TOP3B/OGT/ATRX/ESCO1/SMCHD1/SREBF1/NIPBL/FMR1/UBN1/SETDB1
GO:2001252	positive regulation of chromosome organization	11/373	57/7709	7.25487e-05	0.0354908	0.0354908	11	NSD3/TNKS/ING2/TASOR/MORC2/ATM/OGT/SREBF1/NIPBL/FMR1/SETDB1
GO:0022904	respiratory electron transport chain	9/373	41/7709	0.000116402	0.0426493	0.0426493	9	ND1/ND2/COX1/COX2/COX3/ND4L/ND4/ND5/CYTB
GO:0042773	ATP synthesis coupled electron transport	8/373	33/7709	0.000133137	0.0426493	0.0426493	8	ND1/ND2/COX1/COX2/COX3/ND4L/ND4/ND5
GO:0016569	covalent chromatin modification	20/373	166/7709	0.000139491	0.0426493	0.0426493	20	UBR2/EPC1/IWS1/KAT6A/NSD3/KDM3A/ING2/TASOR/BAP1/RCOR3/MORC2/ATM/KDM6A/TRRAP/OGT/ATRX/SREBF1/NIPBL/FMR1/SETDB1

## Sheet: module_navajowhite1
TABLE S3. Complete results of functional enrichment analyses.
Term ID	Description	GeneRatio	BgRatio	pvalue	p.adjust	qvalue	Count	Gene IDs
GO:0002682	regulation of immune system process	125/1059	461/7709	3.62376e-15	9.27235e-12	8.43016e-12	125	IFNG/LTA/TNF/EZR/DLA-DQA1/DLA-DOB/DLA-DOA/THEMIS/RAC2/ANXA1/CD274/IL18RAP/IL18R1/IL1RL1/SHB/PELI1/CNOT4/ZC3H12A/IL4I1/FLT3LG/IL21/DLL1/HMCES/ELF1/TGFB1/GATA3/IL2RA/METTL3/NPLOC4/PLCL2/MAVS/TESPA1/TOX/DNASE1L3/NCK1/CD8B/PIK3R1/IL7/BLNK/CXCL13/NLRC5/PTPN22/EGR3/POLR3D/CD101/CD40/LDB1/RAB29/GPLD1/ETS1/CD96/UBASH3A/SPPL3/LCK/ICOSLG/TIGIT/CD80/CD160/POLR3C/PTPRC/CFI/HCLS1/CLCF1/CRTAM/MILR1/PARP9/DTX3L…
GO:0046649	lymphocyte activation	83/1059	256/7709	5.2327e-15	9.27235e-12	8.43016e-12	83	IFNG/DLA-DQA1/DLA-DOA/THEMIS/ST3GAL1/EGR1/RAC2/ANXA1/SRF/CD274/IL18R1/SHB/CTPS1/PELI1/ZC3H12A/TNFSF8/IL4I1/FLT3LG/IL21/DLL1/HMCES/TGFB1/GATA3/IL2RA/CMTM7/EOMES/PLCL2/TOX/NCK1/CD8A/PIK3R1/IL7/LMBR1L/PTPN22/EGR3/CD40/RAB29/LCK/TXLNA/TIGIT/CD80/CLCF1/CRTAM/CXCR5/TP53BP1/CD3G/CD3E/CD28/CTLA4/ICOS/ZBTB16/CCR9/JAK3/STAT3/ZBTB1/CARD11/IKZF3/CD5/PRR7/TNFRSF1B/PRELID1/FCRL1/MSN/VSIG4/KAT7/DOCK2/IL12B/ITK/…
GO:0045321	leukocyte activation	90/1059	301/7709	8.3484e-14	9.86224e-11	8.96648e-11	90	IFNG/TNF/DLA-DQA1/DLA-DOA/THEMIS/ST3GAL1/EGR1/RAC2/ANXA1/SRF/CD274/IL18RAP/IL18R1/IL1RL1/SHB/PRKCE/CTPS1/PELI1/ZC3H12A/TNFSF8/IL4I1/FLT3LG/IL21/DLL1/HMCES/TGFB1/GATA3/IL2RA/CMTM7/EOMES/PLCL2/TOX/DNASE1L3/NCK1/CD8A/PIK3R1/IL7/LMBR1L/PTPN22/EGR3/CD40/RAB29/LCK/TXLNA/TIGIT/CD80/CLCF1/CRTAM/MILR1/CXCR5/TP53BP1/CD3G/CD3E/CD28/CTLA4/ICOS/ZBTB16/CCR9/JAK3/STAT3/ZBTB1/CARD11/IKZF3/CD5/PRR7/TNFRSF1B/PRELI…
GO:0042110	T cell activation	63/1059	183/7709	5.63556e-13	4.99311e-10	4.53959e-10	63	IFNG/DLA-DQA1/DLA-DOA/THEMIS/EGR1/RAC2/ANXA1/SRF/CD274/IL18R1/SHB/CTPS1/PELI1/ZC3H12A/TNFSF8/IL4I1/IL21/GATA3/IL2RA/EOMES/TOX/NCK1/CD8A/IL7/LMBR1L/PTPN22/EGR3/RAB29/LCK/TIGIT/CD80/CRTAM/CD3G/CD3E/CD28/CTLA4/ICOS/ZBTB16/CCR9/JAK3/STAT3/ZBTB1/CARD11/CD5/PRR7/TNFRSF1B/PRELID1/MSN/VSIG4/DOCK2/IL12B/ITK/BCL11B/PTGER4/TNFSF14/SASH3/IL7R/SMAD7/ABL1/RHOA/THY1/IL18/SDC4
GO:0002684	positive regulation of immune system process	87/1059	299/7709	1.21365e-12	8.60238e-10	7.82104e-10	87	IFNG/LTA/TNF/EZR/DLA-DQA1/THEMIS/RAC2/ANXA1/CD274/IL18RAP/IL18R1/IL1RL1/SHB/PELI1/ZC3H12A/IL4I1/FLT3LG/IL21/HMCES/ELF1/TGFB1/GATA3/IL2RA/PLCL2/MAVS/TESPA1/TOX/NCK1/IL7/BLNK/CXCL13/NLRC5/PTPN22/EGR3/POLR3D/CD101/CD40/RAB29/GPLD1/UBASH3A/SPPL3/LCK/ICOSLG/CD80/POLR3C/PTPRC/CFI/HCLS1/CLCF1/CRTAM/PARP9/TP53BP1/CD3E/CD28/CTLA4/ICOS/KLRD1/CREB1/ZBTB16/JAK3/C1QBP/PRKCH/UBE2K/ZBTB1/CARD11/CD5/MED1/VSIG4/I…
GO:0030098	lymphocyte differentiation	55/1059	153/7709	2.40543e-12	1.42081e-09	1.29176e-09	55	IFNG/DLA-DQA1/DLA-DOA/THEMIS/ST3GAL1/EGR1/ANXA1/SRF/IL18R1/SHB/ZC3H12A/TNFSF8/IL4I1/FLT3LG/IL21/DLL1/GATA3/CMTM7/EOMES/PLCL2/TOX/CD8A/PIK3R1/IL7/LMBR1L/PTPN22/EGR3/LCK/CRTAM/CD3G/CD3E/CTLA4/ZBTB16/CCR9/JAK3/STAT3/ZBTB1/CARD11/IKZF3/PRR7/PRELID1/KAT7/DOCK2/IL12B/ITK/BCL11B/YY1/PTGER4/SASH3/IL7R/SMAD7/ABL1/RHOA/TLR9/IL18
GO:0050778	positive regulation of immune response	60/1059	178/7709	5.70803e-12	2.84434e-09	2.58599e-09	60	IFNG/LTA/TNF/EZR/THEMIS/ANXA1/CD274/IL18RAP/IL18R1/SHB/ZC3H12A/IL21/HMCES/ELF1/TGFB1/GATA3/PLCL2/MAVS/TESPA1/BLNK/NLRC5/PTPN22/POLR3D/CD40/RAB29/GPLD1/UBASH3A/SPPL3/LCK/ICOSLG/POLR3C/PTPRC/CFI/CRTAM/PARP9/TP53BP1/CD3E/CD28/CTLA4/KLRD1/C1QBP/PRKCH/UBE2K/ZBTB1/CARD11/MED1/VSIG4/IL12B/ITK/C6/SASH3/ABL1/TLR9/KLRK1/THY1/SH2D1A/IL18/TRAT1/NCR3/HRAS
GO:0050776	regulation of immune response	72/1059	234/7709	6.42063e-12	2.84434e-09	2.58599e-09	72	IFNG/LTA/TNF/EZR/THEMIS/RAC2/ANXA1/CD274/IL18RAP/IL18R1/IL1RL1/SHB/ZC3H12A/IL4I1/IL21/HMCES/ELF1/TGFB1/GATA3/METTL3/PLCL2/MAVS/TESPA1/CD8B/BLNK/NLRC5/PTPN22/POLR3D/CD40/RAB29/GPLD1/CD96/UBASH3A/SPPL3/LCK/ICOSLG/CD160/POLR3C/PTPRC/CFI/CRTAM/PARP9/TP53BP1/CD3E/CD28/CTLA4/PDCD1/KLRD1/C1QBP/PRKCH/UBE2K/ZBTB1/CARD11/TNFRSF1B/MED1/VSIG4/IL12B/ITK/C6/SASH3/IL7R/SMAD7/CACTIN/ABL1/TLR9/KLRK1/THY1/SH2D1A/I…
GO:0001775	cell activation	92/1059	336/7709	1.20012e-11	4.49059e-09	4.08272e-09	92	IFNG/TNF/DLA-DQA1/DLA-DOA/THEMIS/ST3GAL1/EGR1/RAC2/ANXA1/SRF/CD274/IL18RAP/IL18R1/IL1RL1/SHB/PRKCE/CTPS1/PELI1/ZC3H12A/TNFSF8/IL4I1/FLT3LG/IL21/DLL1/HMCES/TGFB1/GATA3/KLF5/IL2RA/CMTM7/EOMES/PLCL2/TOX/DNASE1L3/NCK1/CD8A/PIK3R1/IL7/LMBR1L/PTPN22/EGR3/CD40/NFKB2/RAB29/LCK/TXLNA/TIGIT/CD80/CLCF1/CRTAM/MILR1/CXCR5/TP53BP1/CD3G/CD3E/CD28/CTLA4/ICOS/ZBTB16/CCR9/JAK3/STAT3/ZBTB1/CARD11/IKZF3/CD5/PRR7/TNF…
GO:0002521	leukocyte differentiation	68/1059	218/7709	1.2671e-11	4.49059e-09	4.08272e-09	68	IFNG/TNF/DLA-DQA1/DLA-DOA/THEMIS/ST3GAL1/EGR1/ANXA1/SRF/IL18R1/SHB/ZC3H12A/TNFSF8/IL4I1/FLT3LG/OSTM1/IL21/DLL1/TGFB1/GATA3/CMTM7/EOMES/PLCL2/TOX/CD8A/PIK3R1/IL7/LMBR1L/PTPN22/EGR3/CD101/LCK/HCLS1/CRTAM/CD3G/CD3E/CTLA4/CREB1/ZBTB16/ADIPOQ/CCR9/FBN1/JAK3/STAT3/ZBTB1/CARD11/IKZF3/PRR7/MED1/PRELID1/KAT7/DOCK2/IL12B/GPR68/ITK/BCL11B/YY1/PTGER4/SASH3/IL7R/SMAD7/ABL1/RHOA/TLR9/CASP8/JUNB/IL18/LIF
GO:0030217	T cell differentiation	44/1059	114/7709	2.55987e-11	8.24744e-09	7.49834e-09	44	IFNG/DLA-DQA1/DLA-DOA/THEMIS/EGR1/ANXA1/SRF/IL18R1/SHB/ZC3H12A/TNFSF8/IL4I1/IL21/GATA3/EOMES/TOX/CD8A/IL7/LMBR1L/PTPN22/EGR3/LCK/CRTAM/CD3G/CD3E/CTLA4/ZBTB16/CCR9/STAT3/ZBTB1/CARD11/PRR7/PRELID1/DOCK2/IL12B/ITK/BCL11B/PTGER4/SASH3/IL7R/SMAD7/ABL1/RHOA/IL18
GO:1903131	mononuclear cell differentiation	57/1059	175/7709	9.21245e-11	2.72074e-08	2.47362e-08	57	IFNG/DLA-DQA1/DLA-DOA/THEMIS/ST3GAL1/EGR1/ANXA1/SRF/IL18R1/SHB/ZC3H12A/TNFSF8/IL4I1/FLT3LG/IL21/DLL1/GATA3/CMTM7/EOMES/PLCL2/TOX/CD8A/PIK3R1/IL7/LMBR1L/PTPN22/EGR3/LCK/CRTAM/CD3G/CD3E/CTLA4/ZBTB16/CCR9/JAK3/STAT3/ZBTB1/CARD11/IKZF3/PRR7/MED1/PRELID1/KAT7/DOCK2/IL12B/GPR68/ITK/BCL11B/YY1/PTGER4/SASH3/IL7R/SMAD7/ABL1/RHOA/TLR9/IL18
GO:0050863	regulation of T cell activation	44/1059	119/7709	1.3519e-10	3.68549e-08	3.35074e-08	44	IFNG/DLA-DQA1/DLA-DOA/RAC2/ANXA1/CD274/SHB/PELI1/ZC3H12A/IL4I1/IL21/GATA3/IL2RA/TOX/NCK1/IL7/PTPN22/EGR3/LCK/TIGIT/CD80/CRTAM/CD3E/CD28/CTLA4/ICOS/ZBTB16/JAK3/ZBTB1/CARD11/CD5/TNFRSF1B/PRELID1/VSIG4/IL12B/TNFSF14/SASH3/IL7R/SMAD7/ABL1/RHOA/THY1/IL18/SDC4
GO:0051249	regulation of lymphocyte activation	52/1059	161/7709	8.78445e-10	2.22372e-07	2.02174e-07	52	IFNG/DLA-DQA1/DLA-DOA/RAC2/ANXA1/CD274/SHB/PELI1/ZC3H12A/IL4I1/FLT3LG/IL21/HMCES/TGFB1/GATA3/IL2RA/TOX/NCK1/IL7/PTPN22/EGR3/CD40/LCK/TIGIT/CD80/CLCF1/CRTAM/TP53BP1/CD3E/CD28/CTLA4/ICOS/ZBTB16/JAK3/ZBTB1/CARD11/IKZF3/CD5/TNFRSF1B/PRELID1/VSIG4/IL12B/TNFSF14/SASH3/IL7R/SMAD7/ABL1/RHOA/TLR9/THY1/IL18/SDC4
GO:0007159	leukocyte cell-cell adhesion	45/1059	132/7709	1.77568e-09	3.80633e-07	3.46061e-07	45	IFNG/TNF/EZR/DLA-DQA1/RAC2/ANXA1/CD274/SHB/PELI1/ZC3H12A/IL4I1/IL21/GATA3/IL2RA/NCK1/IL7/PTPN22/EGR3/ETS1/LCK/TIGIT/CD80/CRTAM/CD3E/CD28/CTLA4/ICOS/ZBTB16/JAK3/ZBTB1/CARD11/CD5/MSN/VSIG4/STK10/IL12B/TNFSF14/SASH3/IL7R/SMAD7/IRAK1/RHOA/THY1/IL18/SDC4
GO:0051251	positive regulation of lymphocyte activation	39/1059	106/7709	1.80651e-09	3.80633e-07	3.46061e-07	39	IFNG/DLA-DQA1/ANXA1/CD274/SHB/PELI1/IL4I1/FLT3LG/IL21/HMCES/TGFB1/GATA3/IL2RA/TOX/NCK1/IL7/PTPN22/EGR3/CD40/LCK/CD80/CLCF1/TP53BP1/CD3E/CD28/ICOS/ZBTB16/JAK3/ZBTB1/CARD11/CD5/IL12B/TNFSF14/SASH3/IL7R/RHOA/TLR9/THY1/IL18
GO:0002520	immune system development	91/1059	361/7709	1.82584e-09	3.80633e-07	3.46061e-07	91	IFNG/LTA/TNF/DLA-DQA1/DLA-DOA/THEMIS/ST3GAL1/EGR1/ANXA1/SRF/CD274/IL18R1/SHB/CNOT4/ZC3H12A/TNFSF8/IL4I1/FLT3LG/OSTM1/IL21/DLL1/HMCES/CCR4/TGFB1/GATA3/SLC25A38/IL2RA/CMTM7/EOMES/PLCL2/TOX/CD8A/PIK3R1/IL7/LMBR1L/PTPN22/EGR3/CD101/CD40/LDB1/NFKB2/ETS1/LCK/HCLS1/CRTAM/SLC37A4/CXCR5/TP53BP1/CD3G/CD3E/CTLA4/ICOS/NFKBIA/NFE2L2/CREB1/ZBTB16/ADIPOQ/CCR9/SLC4A1/FBN1/JAK3/STAT3/ZBTB1/CARD11/IKZF3/PRR7/MED1/…
GO:0002683	negative regulation of immune system process	48/1059	146/7709	2.03132e-09	3.99944e-07	3.63618e-07	48	TNF/EZR/DLA-DOB/DLA-DOA/ANXA1/CD274/IL1RL1/PELI1/ZC3H12A/IL4I1/ELF1/TGFB1/IL2RA/METTL3/NPLOC4/PLCL2/PIK3R1/NLRC5/PTPN22/CD96/UBASH3A/TIGIT/CD80/CRTAM/MILR1/GPATCH3/CTLA4/PDCD1/KLRD1/ADIPOQ/FBN1/TAPBPL/C1QBP/VSIG4/SYT11/TGFB3/IL12B/GPR68/PTGER4/IL7R/SMAD7/CACTIN/KLRK1/THY1/SH2D1A/TSC22D3/SDC4/RNF125
GO:1903037	regulation of leukocyte cell-cell adhesion	41/1059	116/7709	2.78943e-09	5.20302e-07	4.73044e-07	41	IFNG/TNF/DLA-DQA1/ANXA1/CD274/SHB/PELI1/ZC3H12A/IL4I1/IL21/GATA3/IL2RA/NCK1/IL7/PTPN22/EGR3/ETS1/LCK/TIGIT/CD80/CRTAM/CD3E/CD28/CTLA4/ICOS/ZBTB16/JAK3/ZBTB1/CARD11/CD5/VSIG4/IL12B/TNFSF14/SASH3/IL7R/SMAD7/IRAK1/RHOA/THY1/IL18/SDC4
GO:0002694	regulation of leukocyte activation	55/1059	183/7709	5.49487e-09	9.73691e-07	8.85253e-07	55	IFNG/DLA-DQA1/DLA-DOA/RAC2/ANXA1/CD274/IL1RL1/SHB/PELI1/ZC3H12A/IL4I1/FLT3LG/IL21/HMCES/TGFB1/GATA3/IL2RA/TOX/NCK1/IL7/PTPN22/EGR3/CD40/LCK/TIGIT/CD80/CLCF1/CRTAM/MILR1/TP53BP1/CD3E/CD28/CTLA4/ICOS/ZBTB16/JAK3/ZBTB1/CARD11/IKZF3/CD5/TNFRSF1B/PRELID1/VSIG4/SYT11/IL12B/TNFSF14/SASH3/IL7R/SMAD7/ABL1/RHOA/TLR9/THY1/IL18/SDC4
GO:1903039	positive regulation of leukocyte cell-cell adhesion	33/1059	85/7709	6.76353e-09	1.07175e-06	9.74402e-07	33	IFNG/TNF/DLA-DQA1/ANXA1/CD274/SHB/IL4I1/IL21/GATA3/IL2RA/NCK1/IL7/PTPN22/EGR3/ETS1/LCK/CD80/CD3E/CD28/ICOS/ZBTB16/JAK3/ZBTB1/CARD11/CD5/IL12B/TNFSF14/SASH3/IL7R/IRAK1/RHOA/THY1/IL18
GO:0002429	immune response-activating cell surface receptor signaling pathway	31/1059	77/7709	6.95547e-09	1.07175e-06	9.74402e-07	31	EZR/THEMIS/SHB/ZC3H12A/ELF1/GATA3/PLCL2/TESPA1/BLNK/PTPN22/RAB29/GPLD1/UBASH3A/SPPL3/LCK/ICOSLG/PTPRC/CD3E/CD28/CTLA4/KLRD1/PRKCH/CARD11/ITK/ABL1/KLRK1/THY1/SH2D1A/TRAT1/NCR3/HRAS
GO:0002757	immune response-activating signal transduction	31/1059	77/7709	6.95547e-09	1.07175e-06	9.74402e-07	31	EZR/THEMIS/SHB/ZC3H12A/ELF1/GATA3/PLCL2/TESPA1/BLNK/PTPN22/RAB29/GPLD1/UBASH3A/SPPL3/LCK/ICOSLG/PTPRC/CD3E/CD28/CTLA4/KLRD1/PRKCH/CARD11/ITK/ABL1/KLRK1/THY1/SH2D1A/TRAT1/NCR3/HRAS
GO:0002253	activation of immune response	37/1059	102/7709	7.3998e-09	1.0927e-06	9.93455e-07	37	EZR/THEMIS/SHB/ZC3H12A/ELF1/GATA3/PLCL2/MAVS/TESPA1/BLNK/PTPN22/RAB29/GPLD1/UBASH3A/SPPL3/LCK/ICOSLG/PTPRC/CFI/CD3E/CD28/CTLA4/KLRD1/C1QBP/PRKCH/CARD11/VSIG4/ITK/C6/ABL1/TLR9/KLRK1/THY1/SH2D1A/TRAT1/NCR3/HRAS
GO:0050852	T cell receptor signaling pathway	23/1059	48/7709	1.18451e-08	1.67916e-06	1.52664e-06	23	EZR/THEMIS/SHB/ZC3H12A/ELF1/GATA3/TESPA1/PTPN22/RAB29/UBASH3A/SPPL3/ICOSLG/PTPRC/CD3E/CD28/CTLA4/CARD11/ITK/ABL1/THY1/SH2D1A/TRAT1/HRAS
GO:0046631	alpha-beta T cell activation	27/1059	63/7709	1.32485e-08	1.80588e-06	1.64185e-06	27	IFNG/ANXA1/CD274/IL18R1/SHB/ZC3H12A/TNFSF8/IL21/GATA3/EOMES/TOX/PTPN22/CRTAM/CD3E/ZBTB16/STAT3/PRR7/DOCK2/IL12B/ITK/BCL11B/PTGER4/SASH3/SMAD7/ABL1/RHOA/IL18
GO:0048534	hematopoietic or lymphoid organ development	84/1059	338/7709	1.62515e-08	2.13316e-06	1.93941e-06	84	IFNG/LTA/TNF/DLA-DQA1/DLA-DOA/THEMIS/ST3GAL1/EGR1/ANXA1/SRF/IL18R1/SHB/CNOT4/ZC3H12A/TNFSF8/IL4I1/FLT3LG/OSTM1/IL21/DLL1/TGFB1/GATA3/SLC25A38/CMTM7/EOMES/PLCL2/TOX/CD8A/PIK3R1/IL7/LMBR1L/PTPN22/EGR3/CD101/LDB1/NFKB2/ETS1/LCK/HCLS1/CRTAM/SLC37A4/CXCR5/CD3G/CD3E/CTLA4/NFKBIA/NFE2L2/CREB1/ZBTB16/ADIPOQ/CCR9/SLC4A1/FBN1/JAK3/STAT3/ZBTB1/CARD11/IKZF3/PRR7/MED1/PRELID1/CDK5RAP3/AHSP/KAT7/DOCK2/IL12B/GP…
GO:0002764	immune response-regulating signaling pathway	32/1059	84/7709	1.96793e-08	2.40494e-06	2.1865e-06	32	EZR/THEMIS/SHB/ZC3H12A/ELF1/GATA3/PLCL2/TESPA1/BLNK/PTPN22/CD40/RAB29/GPLD1/UBASH3A/SPPL3/LCK/ICOSLG/PTPRC/CD3E/CD28/CTLA4/KLRD1/PRKCH/CARD11/ITK/ABL1/KLRK1/THY1/SH2D1A/TRAT1/NCR3/HRAS
GO:0002768	immune response-regulating cell surface receptor signaling pathway	32/1059	84/7709	1.96793e-08	2.40494e-06	2.1865e-06	32	EZR/THEMIS/SHB/ZC3H12A/ELF1/GATA3/PLCL2/TESPA1/BLNK/PTPN22/CD40/RAB29/GPLD1/UBASH3A/SPPL3/LCK/ICOSLG/PTPRC/CD3E/CD28/CTLA4/KLRD1/PRKCH/CARD11/ITK/ABL1/KLRK1/THY1/SH2D1A/TRAT1/NCR3/HRAS
GO:1902105	regulation of leukocyte differentiation	38/1059	110/7709	2.18211e-08	2.5255e-06	2.29611e-06	38	IFNG/TNF/DLA-DQA1/DLA-DOA/ANXA1/SHB/ZC3H12A/IL4I1/FLT3LG/TGFB1/GATA3/TOX/PIK3R1/IL7/EGR3/CD101/HCLS1/CRTAM/CTLA4/CREB1/ZBTB16/ADIPOQ/FBN1/ZBTB1/CARD11/IKZF3/PRELID1/IL12B/GPR68/SASH3/IL7R/SMAD7/ABL1/RHOA/TLR9/CASP8/IL18/LIF
GO:0022409	positive regulation of cell-cell adhesion	35/1059	97/7709	2.2091e-08	2.5255e-06	2.29611e-06	35	IFNG/FLOT1/TNF/DLA-DQA1/ANXA1/CD274/SHB/IL4I1/IL21/GATA3/IL2RA/NCK1/IL7/PTPN22/EGR3/ETS1/LCK/CD80/CD3E/CD28/ICOS/ZBTB16/JAK3/ZBTB1/CARD11/CD5/IL12B/TNFSF14/SASH3/IL7R/SMAD7/IRAK1/RHOA/THY1/IL18
GO:1903706	regulation of hemopoiesis	45/1059	143/7709	2.96626e-08	3.21169e-06	2.91998e-06	45	IFNG/TNF/DLA-DQA1/DLA-DOA/ANXA1/SHB/CNOT4/ZC3H12A/IL4I1/FLT3LG/DLL1/TGFB1/GATA3/TOX/PIK3R1/IL7/EGR3/CD101/LDB1/ETS1/HCLS1/CRTAM/CTLA4/NFKBIA/CREB1/ZBTB16/ADIPOQ/FBN1/ZBTB1/CARD11/IKZF3/MED1/PRELID1/KAT7/IL12B/GPR68/SASH3/IL7R/SMAD7/ABL1/RHOA/TLR9/CASP8/IL18/LIF
GO:0050870	positive regulation of T cell activation	30/1059	77/7709	2.99057e-08	3.21169e-06	2.91998e-06	30	IFNG/DLA-DQA1/ANXA1/CD274/SHB/IL4I1/IL21/GATA3/IL2RA/NCK1/IL7/PTPN22/EGR3/LCK/CD80/CD3E/CD28/ICOS/ZBTB16/JAK3/ZBTB1/CARD11/CD5/IL12B/TNFSF14/SASH3/IL7R/RHOA/THY1/IL18
GO:0030097	hemopoiesis	80/1059	322/7709	3.68273e-08	3.74169e-06	3.40184e-06	80	IFNG/TNF/DLA-DQA1/DLA-DOA/THEMIS/ST3GAL1/EGR1/ANXA1/SRF/IL18R1/SHB/CNOT4/ZC3H12A/TNFSF8/IL4I1/FLT3LG/OSTM1/IL21/DLL1/TGFB1/GATA3/SLC25A38/CMTM7/EOMES/PLCL2/TOX/CD8A/PIK3R1/IL7/LMBR1L/PTPN22/EGR3/CD101/LDB1/ETS1/LCK/HCLS1/CRTAM/SLC37A4/CD3G/CD3E/CTLA4/NFKBIA/NFE2L2/CREB1/ZBTB16/ADIPOQ/CCR9/SLC4A1/FBN1/JAK3/STAT3/ZBTB1/CARD11/IKZF3/PRR7/MED1/PRELID1/CDK5RAP3/AHSP/KAT7/DOCK2/IL12B/GPR68/ITK/BCL11B/Y…
GO:0002250	adaptive immune response	42/1059	130/7709	3.69523e-08	3.74169e-06	3.40184e-06	42	IFNG/LTA/TNF/DLA-DQA1/TAP2/TAP1/DLA-DOB/DLA-DMA/DLA-DMB/DLA-DOA/ANXA1/CD274/IL18R1/IL1RL1/ZC3H12A/IL4I1/HMCES/TGFB1/GATA3/CD8A/CD40/NFKB2/CD160/TP53BP1/CD3G/CD3E/KLRD1/STAT3/C1QBP/ZBTB1/TNFRSF1B/IL12B/ITK/C6/SASH3/IL7R/SMAD7/KLRK1/CD7/SH2D1A/IL18/HRAS
GO:0002696	positive regulation of leukocyte activation	40/1059	121/7709	3.81661e-08	3.75724e-06	3.41597e-06	40	IFNG/DLA-DQA1/ANXA1/CD274/IL1RL1/SHB/PELI1/IL4I1/FLT3LG/IL21/HMCES/TGFB1/GATA3/IL2RA/TOX/NCK1/IL7/PTPN22/EGR3/CD40/LCK/CD80/CLCF1/TP53BP1/CD3E/CD28/ICOS/ZBTB16/JAK3/ZBTB1/CARD11/CD5/IL12B/TNFSF14/SASH3/IL7R/RHOA/TLR9/THY1/IL18
GO:0050851	antigen receptor-mediated signaling pathway	27/1059	66/7709	4.38289e-08	4.19809e-06	3.81679e-06	27	EZR/THEMIS/SHB/ZC3H12A/ELF1/GATA3/PLCL2/TESPA1/BLNK/PTPN22/RAB29/UBASH3A/SPPL3/LCK/ICOSLG/PTPRC/CD3E/CD28/CTLA4/PRKCH/CARD11/ITK/ABL1/THY1/SH2D1A/TRAT1/HRAS
GO:0032943	mononuclear cell proliferation	35/1059	101/7709	7.18578e-08	6.52985e-06	5.93676e-06	35	RAC2/ANXA1/CD274/SHB/CTPS1/PELI1/IL4I1/IL21/IL2RA/PLCL2/NCK1/IL7/LMBR1L/PTPN22/CD40/CD80/CLCF1/CRTAM/CD3E/CD28/CTLA4/JAK3/CARD11/IKZF3/TNFRSF1B/MSN/VSIG4/DOCK2/IL12B/SASH3/IL7R/ABL1/TLR9/IL18/SDC4
GO:0046651	lymphocyte proliferation	35/1059	101/7709	7.18578e-08	6.52985e-06	5.93676e-06	35	RAC2/ANXA1/CD274/SHB/CTPS1/PELI1/IL4I1/IL21/IL2RA/PLCL2/NCK1/IL7/LMBR1L/PTPN22/CD40/CD80/CLCF1/CRTAM/CD3E/CD28/CTLA4/JAK3/CARD11/IKZF3/TNFRSF1B/MSN/VSIG4/DOCK2/IL12B/SASH3/IL7R/ABL1/TLR9/IL18/SDC4
GO:0050867	positive regulation of cell activation	40/1059	125/7709	1.0482e-07	9.28702e-06	8.4435e-06	40	IFNG/DLA-DQA1/ANXA1/CD274/IL1RL1/SHB/PELI1/IL4I1/FLT3LG/IL21/HMCES/TGFB1/GATA3/IL2RA/TOX/NCK1/IL7/PTPN22/EGR3/CD40/LCK/CD80/CLCF1/TP53BP1/CD3E/CD28/ICOS/ZBTB16/JAK3/ZBTB1/CARD11/CD5/IL12B/TNFSF14/SASH3/IL7R/RHOA/TLR9/THY1/IL18
GO:0022407	regulation of cell-cell adhesion	45/1059	149/7709	1.16543e-07	1.00739e-05	9.15891e-06	45	IFNG/FLOT1/TNF/DLA-DQA1/ANXA1/CD274/SHB/PELI1/ZC3H12A/IL4I1/IL21/TGFB1/GATA3/IL2RA/NCK1/IL7/PTPN22/EGR3/ETS1/LCK/TIGIT/CD80/CRTAM/CD3E/CD28/CTLA4/ICOS/ZBTB16/ADIPOQ/JAK3/ZBTB1/CARD11/CD5/VSIG4/IL12B/TNFSF14/SASH3/IL7R/SMAD7/IRAK1/ABL1/RHOA/THY1/IL18/SDC4
GO:0070661	leukocyte proliferation	36/1059	108/7709	1.44473e-07	1.21908e-05	1.10835e-05	36	RAC2/ANXA1/CD274/SHB/CTPS1/PELI1/IL4I1/FLT3LG/IL21/IL2RA/PLCL2/NCK1/IL7/LMBR1L/PTPN22/CD40/CD80/CLCF1/CRTAM/CD3E/CD28/CTLA4/JAK3/CARD11/IKZF3/TNFRSF1B/MSN/VSIG4/DOCK2/IL12B/SASH3/IL7R/ABL1/TLR9/IL18/SDC4
GO:0050865	regulation of cell activation	55/1059	200/7709	1.61326e-07	1.32962e-05	1.20886e-05	55	IFNG/DLA-DQA1/DLA-DOA/RAC2/ANXA1/CD274/IL1RL1/SHB/PELI1/ZC3H12A/IL4I1/FLT3LG/IL21/HMCES/TGFB1/GATA3/IL2RA/TOX/NCK1/IL7/PTPN22/EGR3/CD40/LCK/TIGIT/CD80/CLCF1/CRTAM/MILR1/TP53BP1/CD3E/CD28/CTLA4/ICOS/ZBTB16/JAK3/ZBTB1/CARD11/IKZF3/CD5/TNFRSF1B/PRELID1/VSIG4/SYT11/IL12B/TNFSF14/SASH3/IL7R/SMAD7/ABL1/RHOA/TLR9/THY1/IL18/SDC4
GO:0046632	alpha-beta T cell differentiation	22/1059	50/7709	1.67548e-07	1.34953e-05	1.22695e-05	22	IFNG/ANXA1/IL18R1/SHB/ZC3H12A/TNFSF8/IL21/GATA3/EOMES/TOX/ZBTB16/STAT3/PRR7/IL12B/ITK/BCL11B/PTGER4/SASH3/SMAD7/ABL1/RHOA/IL18
GO:1902107	positive regulation of leukocyte differentiation	25/1059	63/7709	2.80263e-07	2.15924e-05	1.96312e-05	25	IFNG/TNF/DLA-DQA1/ANXA1/SHB/IL4I1/FLT3LG/TGFB1/GATA3/TOX/IL7/EGR3/CD101/HCLS1/CREB1/ZBTB16/ZBTB1/IL12B/GPR68/SASH3/IL7R/RHOA/CASP8/IL18/LIF
GO:1903708	positive regulation of hemopoiesis	25/1059	63/7709	2.80263e-07	2.15924e-05	1.96312e-05	25	IFNG/TNF/DLA-DQA1/ANXA1/SHB/IL4I1/FLT3LG/TGFB1/GATA3/TOX/IL7/EGR3/CD101/HCLS1/CREB1/ZBTB16/ZBTB1/IL12B/GPR68/SASH3/IL7R/RHOA/CASP8/IL18/LIF
GO:0001816	cytokine production	67/1059	269/7709	4.45354e-07	3.35816e-05	3.05314e-05	67	IFNG/FLOT1/LTA/TNF/EZR/EGR1/IRF5/ANXA1/CD274/IL18R1/IL1RL1/PELI1/ZC3H12A/TIA1/IL21/DLL1/ELF1/TGFB1/GATA3/IL17RC/NPLOC4/MAVS/PIK3R1/IL7/PTPN22/POLR3D/CD2/CD40/CD96/UBASH3A/ICOSLG/ARFGEF2/POLR3C/CRTAM/CD34/GPATCH3/SLC37A4/CMA1/CD3E/CD28/ADIPOQ/C1QBP/RNF216/TLR10/CARD11/TNFRSF1B/VSIG4/ARHGEF2/SYT11/TGFB3/IL12B/ITK/YY1/PTGER4/SASH3/SMAD7/CACTIN/IRAK1/ABL1/TLR9/CASP8/KLRK1/TRIB2/IL18/LTB/HRAS/RNF125
GO:0042098	T cell proliferation	27/1059	73/7709	5.077e-07	3.74852e-05	3.40805e-05	27	RAC2/ANXA1/CD274/CTPS1/PELI1/IL4I1/IL21/IL2RA/NCK1/LMBR1L/PTPN22/CD80/CRTAM/CD3E/CD28/CTLA4/JAK3/CARD11/TNFRSF1B/MSN/VSIG4/DOCK2/IL12B/SASH3/ABL1/IL18/SDC4
GO:0001817	regulation of cytokine production	66/1059	267/7709	7.29104e-07	5.27336e-05	4.79439e-05	66	IFNG/FLOT1/LTA/TNF/EZR/EGR1/IRF5/ANXA1/CD274/IL18R1/IL1RL1/PELI1/ZC3H12A/TIA1/IL21/DLL1/ELF1/TGFB1/GATA3/IL17RC/NPLOC4/MAVS/PIK3R1/IL7/PTPN22/POLR3D/CD2/CD40/CD96/UBASH3A/ICOSLG/ARFGEF2/POLR3C/CRTAM/CD34/GPATCH3/SLC37A4/CD3E/CD28/ADIPOQ/C1QBP/RNF216/TLR10/CARD11/TNFRSF1B/VSIG4/ARHGEF2/SYT11/TGFB3/IL12B/ITK/YY1/PTGER4/SASH3/SMAD7/CACTIN/IRAK1/ABL1/TLR9/CASP8/KLRK1/TRIB2/IL18/LTB/HRAS/RNF125
GO:0030155	regulation of cell adhesion	63/1059	253/7709	9.97818e-07	7.07253e-05	6.43015e-05	63	IFNG/FLOT1/TNF/DLA-DQA1/RAC2/ANXA1/SRF/CD274/SHB/PRKCE/PELI1/ZC3H12A/IL4I1/IL21/DLL1/TGFB1/GATA3/LMO7/IL2RA/NCK1/PIK3R1/IL7/RASA1/PTPN22/CYTIP/EGR3/LDB1/ETS1/SLK/LCK/PPP3CA/TIGIT/CD80/CRTAM/PLXNB1/CD3E/CD28/CTLA4/ICOS/ZBTB16/ADIPOQ/SPOCK2/LOC403934/JAK3/C1QBP/ZBTB1/CARD11/CD5/VSIG4/IL12B/TNFSF14/SASH3/IL7R/SMAD7/DAPK3/IRAK1/FLNA/ABL1/RHOA/THY1/IL18/SDC4/LIF
GO:0045619	regulation of lymphocyte differentiation	26/1059	72/7709	1.40565e-06	9.76789e-05	8.88069e-05	26	IFNG/DLA-DQA1/DLA-DOA/ANXA1/SHB/ZC3H12A/IL4I1/FLT3LG/GATA3/TOX/IL7/EGR3/CRTAM/CTLA4/ZBTB16/ZBTB1/CARD11/IKZF3/PRELID1/SASH3/IL7R/SMAD7/ABL1/RHOA/TLR9/IL18
GO:0001818	negative regulation of cytokine production	30/1059	90/7709	1.576e-06	0.000107411	9.76548e-05	30	IFNG/TNF/EZR/ANXA1/CD274/IL1RL1/ZC3H12A/TIA1/DLL1/TGFB1/GATA3/NPLOC4/PTPN22/CD96/CD34/GPATCH3/SLC37A4/ADIPOQ/C1QBP/VSIG4/SYT11/TGFB3/IL12B/YY1/PTGER4/SMAD7/CACTIN/TLR9/TRIB2/RNF125
GO:0070663	regulation of leukocyte proliferation	28/1059	82/7709	2.03558e-06	0.000136115	0.000123752	28	RAC2/ANXA1/CD274/PELI1/IL4I1/FLT3LG/IL21/IL2RA/NCK1/IL7/PTPN22/CD40/CD80/CLCF1/CRTAM/CD3E/CD28/CTLA4/JAK3/CARD11/IKZF3/TNFRSF1B/VSIG4/IL12B/SASH3/TLR9/IL18/SDC4
GO:0032944	regulation of mononuclear cell proliferation	27/1059	78/7709	2.29011e-06	0.000147566	0.000134163	27	RAC2/ANXA1/CD274/PELI1/IL4I1/IL21/IL2RA/NCK1/IL7/PTPN22/CD40/CD80/CLCF1/CRTAM/CD3E/CD28/CTLA4/JAK3/CARD11/IKZF3/TNFRSF1B/VSIG4/IL12B/SASH3/TLR9/IL18/SDC4
GO:0050670	regulation of lymphocyte proliferation	27/1059	78/7709	2.29011e-06	0.000147566	0.000134163	27	RAC2/ANXA1/CD274/PELI1/IL4I1/IL21/IL2RA/NCK1/IL7/PTPN22/CD40/CD80/CLCF1/CRTAM/CD3E/CD28/CTLA4/JAK3/CARD11/IKZF3/TNFRSF1B/VSIG4/IL12B/SASH3/TLR9/IL18/SDC4
GO:0045580	regulation of T cell differentiation	23/1059	61/7709	2.40558e-06	0.000152239	0.000138411	23	IFNG/DLA-DQA1/DLA-DOA/ANXA1/SHB/ZC3H12A/IL4I1/GATA3/TOX/IL7/EGR3/CRTAM/CTLA4/ZBTB16/ZBTB1/CARD11/PRELID1/SASH3/IL7R/SMAD7/ABL1/RHOA/IL18
GO:0032609	interferon-gamma production	19/1059	45/7709	2.50914e-06	0.000153317	0.000139392	19	LTA/TNF/CD274/IL18R1/IL1RL1/ZC3H12A/GATA3/CD2/CD96/CRTAM/CD3E/C1QBP/IL12B/SASH3/ABL1/TLR9/KLRK1/IL18/HRAS
GO:0032649	regulation of interferon-gamma production	19/1059	45/7709	2.50914e-06	0.000153317	0.000139392	19	LTA/TNF/CD274/IL18R1/IL1RL1/ZC3H12A/GATA3/CD2/CD96/CRTAM/CD3E/C1QBP/IL12B/SASH3/ABL1/TLR9/KLRK1/IL18/HRAS
GO:0045785	positive regulation of cell adhesion	44/1059	161/7709	3.35979e-06	0.000201815	0.000183485	44	IFNG/FLOT1/TNF/DLA-DQA1/ANXA1/CD274/SHB/PRKCE/IL4I1/IL21/GATA3/IL2RA/NCK1/IL7/PTPN22/EGR3/LDB1/ETS1/LCK/PPP3CA/CD80/CD3E/CD28/ICOS/ZBTB16/SPOCK2/LOC403934/JAK3/C1QBP/ZBTB1/CARD11/CD5/IL12B/TNFSF14/SASH3/IL7R/SMAD7/IRAK1/FLNA/ABL1/RHOA/THY1/IL18/LIF
GO:0031347	regulation of defense response	49/1059	188/7709	4.1365e-06	0.000241129	0.000219228	49	IFNG/LTA/TNF/ANXA1/IL18RAP/IL1RL1/ZC3H12A/IL21/GATA3/IL2RA/METTL3/NPLOC4/MAVS/DNASE1L3/NLRC5/OTULIN/PTPN22/POLR3D/ETS1/CD96/POLR3C/CRTAM/PARP9/DTX3L/GPATCH3/CMA1/NFKBIA/KLRD1/ADIPOQ/CASP12/C1QBP/UBE2K/RNF216/TLR10/TNFRSF1B/MED1/VSIG4/RORA/SYT11/IL12B/ABCC1/PTGER4/CACTIN/TLR9/KLRK1/SH2D1A/PTGES/NCR3/RNF125
GO:0002697	regulation of immune effector process	41/1059	147/7709	4.15037e-06	0.000241129	0.000219228	41	IFNG/LTA/TNF/RAC2/ANXA1/IL18RAP/IL18R1/SHB/ZC3H12A/IL4I1/IL21/HMCES/TGFB1/GATA3/NPLOC4/MAVS/DNASE1L3/PTPN22/CD40/CD96/CRTAM/DTX3L/GPATCH3/TP53BP1/KLRD1/C1QBP/RNF216/ZBTB1/TNFRSF1B/VSIG4/TGFB3/IL12B/SASH3/IL7R/SMAD7/TLR9/KLRK1/SH2D1A/IL18/NCR3/RNF125
GO:0070266	necroptotic process	9/1059	13/7709	7.17185e-06	0.000409952	0.000372717	9	TNF/PELI1/CYLD/RIPK3/FASLG/BIRC3/TRPM7/ARHGEF2/CASP8
GO:0002831	regulation of response to biotic stimulus	31/1059	101/7709	7.50012e-06	0.0004184	0.000380397	31	CD274/IL18RAP/ZC3H12A/IL4I1/IL21/METTL3/NPLOC4/MAVS/NLRC5/PTPN22/POLR3D/CD96/POLR3C/CRTAM/PARP9/DTX3L/GPATCH3/KLRD1/C1QBP/UBE2K/RNF216/MED1/VSIG4/SYT11/IL12B/CACTIN/TLR9/KLRK1/SH2D1A/NCR3/RNF125
GO:0002706	regulation of lymphocyte mediated immunity	24/1059	69/7709	7.55575e-06	0.0004184	0.000380397	24	LTA/TNF/IL18RAP/IL18R1/IL4I1/IL21/HMCES/TGFB1/GATA3/CD40/CD96/CRTAM/TP53BP1/KLRD1/ZBTB1/TNFRSF1B/IL12B/SASH3/IL7R/SMAD7/KLRK1/SH2D1A/IL18/NCR3
GO:0002708	positive regulation of lymphocyte mediated immunity	19/1059	48/7709	7.89223e-06	0.000430309	0.000391224	19	LTA/TNF/IL18RAP/IL18R1/IL21/HMCES/TGFB1/GATA3/CD40/CRTAM/TP53BP1/KLRD1/ZBTB1/IL12B/SASH3/KLRK1/SH2D1A/IL18/NCR3
GO:0042129	regulation of T cell proliferation	22/1059	61/7709	9.25298e-06	0.000496857	0.000451729	22	RAC2/ANXA1/CD274/PELI1/IL4I1/IL21/IL2RA/NCK1/PTPN22/CD80/CRTAM/CD3E/CD28/CTLA4/JAK3/CARD11/TNFRSF1B/VSIG4/IL12B/SASH3/IL18/SDC4
GO:0002252	immune effector process	61/1059	261/7709	1.32157e-05	0.000699051	0.000635557	61	IFNG/LTA/TNF/ST3GAL1/APOBEC3Z3/RAC2/IRF5/ANXA1/IL18RAP/IL18R1/SHB/PRKCE/ZC3H12A/IL4I1/IL21/DLL1/HMCES/TGFB1/GATA3/EOMES/NPLOC4/PLCL2/MAVS/DNASE1L3/CD8A/OAS3/NLRC5/PTPN22/CD40/CD96/CFI/CRTAM/MILR1/DTX3L/GPATCH3/TP53BP1/KLRD1/MAP3K14/STAT3/C1QBP/RNF216/ZBTB1/DDX41/TNFRSF1B/VSIG4/DOCK2/TGFB3/IL12B/C6/PTGER4/SASH3/IL7R/SMAD7/ABL1/TLR9/KLRK1/SH2D1A/IL18/NCR3/BST2/RNF125
GO:0031349	positive regulation of defense response	25/1059	76/7709	1.50397e-05	0.000783834	0.00071264	25	IFNG/LTA/TNF/IL18RAP/IL1RL1/IL21/MAVS/NLRC5/POLR3D/ETS1/POLR3C/CRTAM/PARP9/NFKBIA/KLRD1/UBE2K/TLR10/MED1/IL12B/ABCC1/PTGER4/TLR9/KLRK1/SH2D1A/NCR3
GO:0042113	B cell activation	28/1059	90/7709	1.54973e-05	0.000795977	0.00072368	28	ST3GAL1/SHB/CTPS1/PELI1/IL21/DLL1/HMCES/TGFB1/CMTM7/PLCL2/PIK3R1/IL7/CD40/TXLNA/CLCF1/CXCR5/TP53BP1/CTLA4/JAK3/ZBTB1/CARD11/IKZF3/FCRL1/YY1/SASH3/IL7R/ABL1/TLR9
GO:1903829	positive regulation of cellular protein localization	26/1059	82/7709	2.13426e-05	0.00108054	0.000982401	26	IFNG/TNF/EZR/CCDC88A/ZC3H12A/DMAP1/TGFB1/MAVS/PIK3R1/PTPN22/TSG101/HCLS1/EPB41/C2CD5/DTX3L/MSN/CDK5RAP3/SYT11/KAT7/CDK5R1/MYO1C/FLNA/ENTR1/ACSL3/LIF/HRAS
GO:0007264	small GTPase mediated signal transduction	44/1059	173/7709	2.46677e-05	0.0012313	0.00111946	44	FLOT1/RAB21/CDC42SE2/RGL2/CYTH4/RAC2/CCDC88A/MET/PIK3CG/RAB4B/RHOF/RASA1/MAPKAPK5/TIAM1/RASAL1/ARHGAP19/RAPGEF3/ARHGAP24/DOK2/PSD/CUL3/DOCK10/P2RY8/ARFGEF2/RAB9A/ARHGEF12/LOC609235/RAP1A/RASGRP2/RFXANK/LOC403934/RAC1/ARHGEF2/RIT1/DOCK2/KCTD13/GPR65/RAP2C/ABL1/RHOA/RAPGEF6/RABIF/HRAS/ITSN1
GO:0002703	regulation of leukocyte mediated immunity	27/1059	88/7709	2.89453e-05	0.00142475	0.00129534	27	LTA/TNF/RAC2/IL18RAP/IL18R1/IL4I1/IL21/HMCES/TGFB1/GATA3/DNASE1L3/CD40/CD96/CRTAM/TP53BP1/KLRD1/ZBTB1/TNFRSF1B/IL12B/SASH3/IL7R/SMAD7/TLR9/KLRK1/SH2D1A/IL18/NCR3
GO:0042100	B cell proliferation	15/1059	36/7709	3.48931e-05	0.00164314	0.0014939	15	SHB/CTPS1/PELI1/IL21/PLCL2/IL7/CD40/CLCF1/CTLA4/CARD11/IKZF3/SASH3/IL7R/ABL1/TLR9
GO:0046634	regulation of alpha-beta T cell activation	15/1059	36/7709	3.48931e-05	0.00164314	0.0014939	15	IFNG/ANXA1/CD274/SHB/ZC3H12A/GATA3/PTPN22/CRTAM/CD3E/ZBTB16/IL12B/SASH3/SMAD7/RHOA/IL18
GO:0097300	programmed necrotic cell death	10/1059	18/7709	3.51996e-05	0.00164314	0.0014939	10	MAP3K5/TNF/PELI1/CYLD/RIPK3/FASLG/BIRC3/TRPM7/ARHGEF2/CASP8
GO:0045089	positive regulation of innate immune response	16/1059	40/7709	3.52366e-05	0.00164314	0.0014939	16	IL18RAP/IL21/MAVS/NLRC5/POLR3D/POLR3C/CRTAM/PARP9/KLRD1/UBE2K/MED1/IL12B/TLR9/KLRK1/SH2D1A/NCR3
GO:0031295	T cell costimulation	8/1059	12/7709	3.66256e-05	0.00168573	0.00153262	8	CD274/CD80/CD3E/CD28/ICOS/CARD11/CD5/TNFSF14
GO:0002287	alpha-beta T cell activation involved in immune response	13/1059	29/7709	4.61618e-05	0.00207085	0.00188276	13	IFNG/ANXA1/IL18R1/SHB/ZC3H12A/IL21/GATA3/EOMES/STAT3/IL12B/PTGER4/SMAD7/IL18
GO:0002293	alpha-beta T cell differentiation involved in immune response	13/1059	29/7709	4.61618e-05	0.00207085	0.00188276	13	IFNG/ANXA1/IL18R1/SHB/ZC3H12A/IL21/GATA3/EOMES/STAT3/IL12B/PTGER4/SMAD7/IL18
GO:0070665	positive regulation of leukocyte proliferation	20/1059	58/7709	4.96116e-05	0.00218261	0.00198436	20	ANXA1/CD274/PELI1/FLT3LG/IL21/IL2RA/NCK1/IL7/PTPN22/CD40/CD80/CLCF1/CD3E/CD28/JAK3/CARD11/IL12B/SASH3/TLR9/IL18
GO:0045582	positive regulation of T cell differentiation	14/1059	33/7709	5.00534e-05	0.00218261	0.00198436	14	IFNG/DLA-DQA1/ANXA1/SHB/IL4I1/GATA3/IL7/EGR3/ZBTB16/ZBTB1/SASH3/IL7R/RHOA/IL18
GO:0045621	positive regulation of lymphocyte differentiation	16/1059	41/7709	5.05005e-05	0.00218261	0.00198436	16	IFNG/DLA-DQA1/ANXA1/SHB/IL4I1/FLT3LG/GATA3/TOX/IL7/EGR3/ZBTB16/ZBTB1/SASH3/IL7R/RHOA/IL18
GO:0032946	positive regulation of mononuclear cell proliferation	19/1059	55/7709	7.40921e-05	0.00310859	0.00282624	19	ANXA1/CD274/PELI1/IL21/IL2RA/NCK1/IL7/PTPN22/CD40/CD80/CLCF1/CD3E/CD28/JAK3/CARD11/IL12B/SASH3/TLR9/IL18
GO:0050671	positive regulation of lymphocyte proliferation	19/1059	55/7709	7.40921e-05	0.00310859	0.00282624	19	ANXA1/CD274/PELI1/IL21/IL2RA/NCK1/IL7/PTPN22/CD40/CD80/CLCF1/CD3E/CD28/JAK3/CARD11/IL12B/SASH3/TLR9/IL18
GO:0002822	regulation of adaptive immune response based on somatic recombination of immune receptors built from immunoglobulin superfamily domains	21/1059	64/7709	7.4557e-05	0.00310859	0.00282624	21	LTA/TNF/ANXA1/CD274/IL18R1/IL1RL1/ZC3H12A/IL4I1/HMCES/TGFB1/GATA3/CD40/TP53BP1/KLRD1/ZBTB1/TNFRSF1B/IL12B/SASH3/IL7R/SMAD7/IL18
GO:0002717	positive regulation of natural killer cell mediated immunity	8/1059	13/7709	8.37515e-05	0.0033729	0.00306655	8	IL18RAP/IL21/CRTAM/KLRD1/IL12B/KLRK1/SH2D1A/NCR3
GO:0031294	lymphocyte costimulation	8/1059	13/7709	8.37515e-05	0.0033729	0.00306655	8	CD274/CD80/CD3E/CD28/ICOS/CARD11/CD5/TNFSF14
GO:0045954	positive regulation of natural killer cell mediated cytotoxicity	8/1059	13/7709	8.37515e-05	0.0033729	0.00306655	8	IL18RAP/IL21/CRTAM/KLRD1/IL12B/KLRK1/SH2D1A/NCR3
GO:0045058	T cell selection	11/1059	23/7709	8.66024e-05	0.00344853	0.0031353	11	THEMIS/SRF/GATA3/TOX/CD3G/CD3E/STAT3/CARD11/DOCK2/BCL11B/RHOA
GO:0033077	T cell differentiation in thymus	12/1059	27/7709	0.000100619	0.00396216	0.00360228	12	SRF/GATA3/TOX/EGR3/CD3G/CD3E/ZBTB1/CARD11/PRR7/DOCK2/BCL11B/IL7R
GO:0035710	CD4-positive, alpha-beta T cell activation	15/1059	39/7709	0.000105315	0.00410148	0.00372895	15	IFNG/ANXA1/CD274/IL18R1/SHB/ZC3H12A/IL21/GATA3/TOX/STAT3/IL12B/PTGER4/SASH3/SMAD7/IL18
GO:1900182	positive regulation of protein localization to nucleus	13/1059	31/7709	0.000107491	0.00413607	0.0037604	13	IFNG/ZC3H12A/DMAP1/TGFB1/MAVS/PIK3R1/PTPN22/HCLS1/DTX3L/CDK5RAP3/KAT7/FLNA/LIF
GO:0043367	CD4-positive, alpha-beta T cell differentiation	14/1059	35/7709	0.000108537	0.00413607	0.0037604	14	IFNG/ANXA1/IL18R1/SHB/ZC3H12A/IL21/GATA3/TOX/STAT3/IL12B/PTGER4/SASH3/SMAD7/IL18
GO:0070265	necrotic cell death	10/1059	20/7709	0.000114399	0.0043131	0.00392135	10	MAP3K5/TNF/PELI1/CYLD/RIPK3/FASLG/BIRC3/TRPM7/ARHGEF2/CASP8
GO:0002705	positive regulation of leukocyte mediated immunity	19/1059	57/7709	0.000128251	0.00478443	0.00434987	19	LTA/TNF/IL18RAP/IL18R1/IL21/HMCES/TGFB1/GATA3/CD40/CRTAM/TP53BP1/KLRD1/ZBTB1/IL12B/SASH3/KLRK1/SH2D1A/IL18/NCR3
GO:0002819	regulation of adaptive immune response	22/1059	71/7709	0.000132688	0.00489841	0.0044535	22	LTA/TNF/ANXA1/CD274/IL18R1/IL1RL1/ZC3H12A/IL4I1/HMCES/TGFB1/GATA3/CD40/CD160/TP53BP1/KLRD1/ZBTB1/TNFRSF1B/IL12B/SASH3/IL7R/SMAD7/IL18
GO:0050854	regulation of antigen receptor-mediated signaling pathway	11/1059	24/7709	0.000140166	0.00512113	0.00465598	11	EZR/ELF1/PLCL2/TESPA1/RAB29/UBASH3A/PRKCH/CARD11/THY1/SH2D1A/TRAT1
GO:0002715	regulation of natural killer cell mediated immunity	9/1059	17/7709	0.000145037	0.0051401	0.00467324	9	IL18RAP/IL21/CD96/CRTAM/KLRD1/IL12B/KLRK1/SH2D1A/NCR3
GO:0050856	regulation of T cell receptor signaling pathway	9/1059	17/7709	0.000145037	0.0051401	0.00467324	9	EZR/ELF1/TESPA1/RAB29/UBASH3A/CARD11/THY1/SH2D1A/TRAT1
GO:0070231	T cell apoptotic process	9/1059	17/7709	0.000145037	0.0051401	0.00467324	9	ST3GAL1/CD274/IL2RA/LMBR1L/FASLG/PRELID1/DFFA/IL7R/TSC22D3
GO:0002699	positive regulation of immune effector process	25/1059	86/7709	0.000149973	0.00526243	0.00478445	25	IFNG/LTA/TNF/RAC2/ANXA1/IL18RAP/IL18R1/SHB/IL21/HMCES/TGFB1/GATA3/PTPN22/CD40/CRTAM/TP53BP1/KLRD1/ZBTB1/IL12B/SASH3/TLR9/KLRK1/SH2D1A/IL18/NCR3
GO:0002294	CD4-positive, alpha-beta T cell differentiation involved in immune response	12/1059	28/7709	0.000154257	0.00535968	0.00487287	12	IFNG/ANXA1/IL18R1/SHB/ZC3H12A/IL21/GATA3/STAT3/IL12B/PTGER4/SMAD7/IL18
GO:0045088	regulation of innate immune response	20/1059	63/7709	0.000183634	0.00631842	0.00574453	20	IL18RAP/IL21/METTL3/MAVS/NLRC5/POLR3D/CD96/POLR3C/CRTAM/PARP9/KLRD1/UBE2K/MED1/VSIG4/IL12B/CACTIN/TLR9/KLRK1/SH2D1A/NCR3
GO:0001819	positive regulation of cytokine production	43/1059	182/7709	0.000190077	0.00646913	0.00588155	43	IFNG/FLOT1/LTA/TNF/EGR1/IRF5/ANXA1/CD274/IL18R1/IL1RL1/PELI1/IL21/TGFB1/GATA3/IL17RC/MAVS/PIK3R1/IL7/PTPN22/POLR3D/CD2/CD40/ARFGEF2/POLR3C/CRTAM/CD34/CD3E/CD28/ADIPOQ/CARD11/ARHGEF2/IL12B/ITK/PTGER4/SASH3/IRAK1/ABL1/TLR9/CASP8/KLRK1/IL18/LTB/HRAS
GO:0046635	positive regulation of alpha-beta T cell activation	10/1059	21/7709	0.000191664	0.00646913	0.00588155	10	IFNG/ANXA1/SHB/PTPN22/CD3E/ZBTB16/IL12B/SASH3/RHOA/IL18
GO:0080134	regulation of response to stress	86/1059	435/7709	0.000208751	0.00697937	0.00634545	86	MAP3K5/PPP1R10/IFNG/LTA/TNF/EZR/OXR1/ANXA1/ABCB1/IL18RAP/IL1RL1/KLHL31/PRKCE/ZC3H12A/MET/IL21/SESN3/XRCC1/GATA3/BABAM2/IL2RA/ULK4/METTL3/NPLOC4/MAVS/LOC102153143/DNASE1L3/NCK1/PIK3R1/USP25/NLRC5/OTULIN/MMS19/PTPN22/CCAR2/POLR3D/PPP1R15B/ETS1/CD96/PPP3CA/POLR3C/CRTAM/CD34/PARP9/DTX3L/GPATCH3/CMA1/TP53BP1/ZNF365/MAGEF1/NFKBIA/KLRD1/NFE2L2/ADIPOQ/CASP12/C1QBP/AKT3/UBE2K/RNF216/TLR10/TNFRSF1B/MED1/UI…
GO:0098609	cell-cell adhesion	61/1059	286/7709	0.00022294	0.00738411	0.00671342	61	IFNG/FLOT1/TNF/EZR/DLA-DQA1/RAC2/ANXA1/SRF/CD274/TLN1/SHB/PELI1/ZC3H12A/IL4I1/IL21/PVR/TGFB1/GATA3/IL2RA/LOC478038/NCK1/IL7/PTPN22/EGR3/ACVR1/CD2/ETS1/TJP1/PKP2/LCK/TIGIT/CD80/CRTAM/CD34/MILR1/CD3E/CD28/CTLA4/ICOS/ZBTB16/ADIPOQ/JAK3/ZBTB1/CARD11/CD5/MSN/VSIG4/STK10/IL12B/CDK5R1/TNFSF14/SASH3/IL7R/SMAD7/IRAK1/LOC479600/ABL1/RHOA/THY1/IL18/SDC4
GO:0002292	T cell differentiation involved in immune response	13/1059	33/7709	0.000228981	0.00744504	0.00676882	13	IFNG/ANXA1/IL18R1/SHB/ZC3H12A/IL21/GATA3/EOMES/STAT3/IL12B/PTGER4/SMAD7/IL18
GO:0032729	positive regulation of interferon-gamma production	13/1059	33/7709	0.000228981	0.00744504	0.00676882	13	LTA/TNF/IL18R1/CD2/CRTAM/CD3E/IL12B/SASH3/ABL1/TLR9/KLRK1/IL18/HRAS
GO:0007265	Ras protein signal transduction	32/1059	125/7709	0.000270242	0.0087067	0.00791588	32	FLOT1/RAB21/CDC42SE2/CYTH4/RAC2/MET/PIK3CG/RAB4B/RASA1/MAPKAPK5/TIAM1/RASAL1/ARHGAP24/DOK2/PSD/CUL3/P2RY8/ARFGEF2/RAB9A/ARHGEF12/LOC609235/RAP1A/RFXANK/LOC403934/RAC1/ARHGEF2/RIT1/KCTD13/GPR65/RAP2C/ABL1/HRAS
GO:0050686	negative regulation of mRNA processing	8/1059	15/7709	0.000324155	0.0103496	0.00940956	8	RNF20/SUPT5H/CCNT1/PCBP4/C1QBP/RNF40/ZC3H14/CDK9
GO:0051222	positive regulation of protein transport	25/1059	90/7709	0.000327563	0.010365	0.00942359	25	IFNG/TNF/EZR/PRKCE/ZC3H12A/DMAP1/TGFB1/APBB3/MAVS/PIK3R1/PTPN22/TSG101/RAB29/HCLS1/C2CD5/MPC2/PPM1A/TGFB3/GPR68/CDK5R1/MYO1C/FLNA/ACSL3/GOLPH3L/HRAS
GO:0002833	positive regulation of response to biotic stimulus	17/1059	52/7709	0.00037334	0.011709	0.0106455	17	CD274/IL18RAP/IL21/MAVS/NLRC5/POLR3D/POLR3C/CRTAM/PARP9/KLRD1/UBE2K/MED1/IL12B/TLR9/KLRK1/SH2D1A/NCR3
GO:0045061	thymic T cell selection	7/1059	12/7709	0.000381424	0.0118576	0.0107806	7	SRF/GATA3/TOX/CD3G/CD3E/CARD11/DOCK2
GO:0098542	defense response to other organism	64/1059	310/7709	0.000407803	0.0125616	0.0114207	64	IFNG/LTA/TNF/DLA-DQA1/SLA/APOBEC3Z3/IRF5/IL18RAP/ZC3H12A/TNFSF8/IL21/IL17RC/METTL3/NPLOC4/MAVS/CXCL13/CCL17/OAS3/NLRC5/OTULIN/IFNAR2/PTPN22/POLR3D/CYLD/CD40/CD96/LCK/POLR3C/CFI/CRTAM/PARP9/DTX3L/GPATCH3/KLRD1/MAP3K14/C1QBP/UBE2K/RNF216/AKAP8/TLR10/DDX41/MED1/VSIG4/ARHGEF2/SYT11/IL12B/C6/IL7R/CIITA/DAPK3/MYO1C/CACTIN/IRAK1/TLR9/KLRK1/TRIM17/SH2D1A/IL18/TRIM59/NCR3/HRAS/BST2/RNF125/CCL22
GO:0045934	negative regulation of nucleobase-containing compound metabolic process	88/1059	456/7709	0.00041116	0.0125616	0.0114207	88	IFNG/TNF/EZR/RING1/L3MBTL2/EGR1/TRERF1/SRF/SMARCA2/ZNF8/ZNF10/RNF20/CBX3/ZC3H12A/TRDMT1/ZNF296/SUV39H2/XRCC1/DMAP1/TGFB1/GATA3/KLF5/SFMBT2/SUPT5H/TAF7/NR2C1/CBX5/LIN37/NCK1/HEY1/PCGF1/CCNT1/ANKRD2/TSG101/CCAR2/CRY2/LDB1/PCBP4/PPP3CA/NFKB1/ZNF639/HCLS1/KDM2A/PARP15/BLM/TP53BP1/RFX5/ARID5B/MAGEF1/LOC490647/SIRT1/CREB1/ADIPOQ/EIF4A2/MEIOC/SLC4A1/FASLG/COPS2/STAT3/POU2F1/C1QBP/FOXP3/ZNF12/KDM5C/MED1/…
GO:0051050	positive regulation of transport	58/1059	275/7709	0.000428463	0.0129784	0.0117996	58	IFNG/FLOT1/TNF/AZIN1/EZR/PICK1/IL2RB/ANXA1/ATP8A1/ABCB1/PRKCE/CALM2/ZC3H12A/DLL1/DMAP1/TGFB1/EHD3/RAB5A/APBB3/MAVS/PIK3R1/GLRX/TRPC1/PTPN22/TSG101/ANO6/ATPSCKMT/RAB29/PPP3CA/HCLS1/RAB9A/C2CD5/NFKBIA/NFE2L2/CREB1/ADIPOQ/FASLG/LOC403934/MPC2/PPM1A/STX18/STIM2/PRELID1/MSN/DOCK2/TGFB3/GPR68/CDK5R1/MYO1C/FLNA/ABL1/ACSL3/THY1/SDC4/GOLPH3L/PTGES/HRAS/ATP5IF1
GO:0034097	response to cytokine	62/1059	299/7709	0.000442978	0.0133044	0.012096	62	STAT6/IFNG/TNF/SLC12A2/DLA-DQA1/EGR1/IRF5/ANXA1/SRF/CD274/IL18RAP/IL18R1/UGCG/ZC3H12A/TIMP4/GATA3/KLF5/METTL3/MAVS/IL7/CXCL13/CCL17/NLRC5/OTULIN/IL10RB/IFNAR2/CD40/ADIPOR1/HCLS1/PARP9/ARID5B/NFKBIA/NFE2L2/CREB1/ADIPOQ/EIF4A2/PCOLCE/SPOCK2/GNPNAT1/JAK3/STAT3/UBE2K/DDX41/MED1/ARHGEF2/IL12B/IL12RB2/CIITA/SMAD7/EBI3/DAPK3/MYO1C/CDIP1/CACTIN/IRAK1/CASP8/IL18/CDK9/PID1/UBE2G2/RNF125/CCL22
GO:0002285	lymphocyte activation involved in immune response	21/1059	72/7709	0.000472329	0.0140667	0.012789	21	IFNG/ST3GAL1/ANXA1/IL18R1/SHB/ZC3H12A/IL21/DLL1/HMCES/TGFB1/GATA3/EOMES/PLCL2/CD40/TP53BP1/STAT3/IL12B/PTGER4/SMAD7/ABL1/IL18
GO:0002228	natural killer cell mediated immunity	10/1059	23/7709	0.000479064	0.0141483	0.0128633	10	IL18RAP/IL21/CD96/CRTAM/KLRD1/IL12B/KLRK1/SH2D1A/IL18/NCR3
GO:0042093	T-helper cell differentiation	11/1059	27/7709	0.000493794	0.0144629	0.0131492	11	ANXA1/IL18R1/SHB/ZC3H12A/IL21/GATA3/STAT3/IL12B/PTGER4/SMAD7/IL18
GO:0002366	leukocyte activation involved in immune response	26/1059	98/7709	0.000548666	0.0158051	0.0143696	26	IFNG/ST3GAL1/RAC2/ANXA1/IL18R1/SHB/PRKCE/ZC3H12A/IL21/DLL1/HMCES/TGFB1/GATA3/EOMES/PLCL2/DNASE1L3/CD40/MILR1/TP53BP1/STAT3/DOCK2/IL12B/PTGER4/SMAD7/ABL1/IL18
GO:0002449	lymphocyte mediated immunity	26/1059	98/7709	0.000548666	0.0158051	0.0143696	26	LTA/TNF/IL18RAP/IL18R1/IL4I1/IL21/HMCES/TGFB1/GATA3/CD8A/CD40/CD96/CRTAM/TP53BP1/KLRD1/ZBTB1/TNFRSF1B/IL12B/C6/SASH3/IL7R/SMAD7/KLRK1/SH2D1A/IL18/NCR3
GO:0032479	regulation of type I interferon production	14/1059	40/7709	0.00055746	0.0158051	0.0143696	14	FLOT1/IRF5/NPLOC4/MAVS/PTPN22/POLR3D/POLR3C/GPATCH3/RNF216/YY1/CACTIN/IRAK1/TLR9/RNF125
GO:0032606	type I interferon production	14/1059	40/7709	0.00055746	0.0158051	0.0143696	14	FLOT1/IRF5/NPLOC4/MAVS/PTPN22/POLR3D/POLR3C/GPATCH3/RNF216/YY1/CACTIN/IRAK1/TLR9/RNF125
GO:0006471	protein ADP-ribosylation	8/1059	16/7709	0.000570615	0.0159233	0.014477	8	IFNG/PARP12/XRCC1/HPF1/SIRT4/PARP9/PARP15/PARP8
GO:0042269	regulation of natural killer cell mediated cytotoxicity	8/1059	16/7709	0.000570615	0.0159233	0.014477	8	IL18RAP/IL21/CRTAM/KLRD1/IL12B/KLRK1/SH2D1A/NCR3
GO:0002263	cell activation involved in immune response	26/1059	99/7709	0.000649061	0.0179441	0.0163143	26	IFNG/ST3GAL1/RAC2/ANXA1/IL18R1/SHB/PRKCE/ZC3H12A/IL21/DLL1/HMCES/TGFB1/GATA3/EOMES/PLCL2/DNASE1L3/CD40/MILR1/TP53BP1/STAT3/DOCK2/IL12B/PTGER4/SMAD7/ABL1/IL18
GO:0032388	positive regulation of intracellular transport	18/1059	59/7709	0.000653159	0.0179441	0.0163143	18	IFNG/EZR/ZC3H12A/DMAP1/TGFB1/MAVS/PIK3R1/PTPN22/RAB29/HCLS1/C2CD5/PPM1A/STX18/MSN/CDK5R1/MYO1C/FLNA/HRAS
GO:1903793	positive regulation of anion transport	34/1059	142/7709	0.000669886	0.0182621	0.0166034	34	IFNG/TNF/AZIN1/EZR/ATP8A1/ABCB1/PRKCE/ZC3H12A/DMAP1/TGFB1/APBB3/MAVS/PIK3R1/PTPN22/TSG101/RAB29/HCLS1/C2CD5/NFKBIA/NFE2L2/ADIPOQ/FASLG/MPC2/PPM1A/PRELID1/TGFB3/GPR68/CDK5R1/MYO1C/FLNA/ACSL3/GOLPH3L/PTGES/HRAS
GO:0042307	positive regulation of protein import into nucleus	9/1059	20/7709	0.000680199	0.0182623	0.0166036	9	IFNG/ZC3H12A/DMAP1/TGFB1/MAVS/PIK3R1/PTPN22/HCLS1/FLNA
GO:2000514	regulation of CD4-positive, alpha-beta T cell activation	9/1059	20/7709	0.000680199	0.0182623	0.0166036	9	IFNG/ANXA1/CD274/SHB/ZC3H12A/GATA3/SASH3/SMAD7/IL18
GO:0030888	regulation of B cell proliferation	10/1059	24/7709	0.000721133	0.0192158	0.0174704	10	PELI1/IL21/IL7/CD40/CLCF1/CTLA4/CARD11/IKZF3/SASH3/TLR9
GO:0002460	adaptive immune response based on somatic recombination of immune receptors built from immunoglobulin superfamily domains	26/1059	100/7709	0.000765141	0.0202363	0.0183982	26	LTA/TNF/ANXA1/CD274/IL18R1/IL1RL1/ZC3H12A/IL4I1/HMCES/TGFB1/GATA3/CD8A/CD40/NFKB2/TP53BP1/KLRD1/STAT3/ZBTB1/TNFRSF1B/IL12B/C6/SASH3/IL7R/SMAD7/IL18/HRAS
GO:1904951	positive regulation of establishment of protein localization	25/1059	95/7709	0.000792475	0.0208039	0.0189144	25	IFNG/TNF/EZR/PRKCE/ZC3H12A/DMAP1/TGFB1/APBB3/MAVS/PIK3R1/PTPN22/TSG101/RAB29/HCLS1/C2CD5/MPC2/PPM1A/TGFB3/GPR68/CDK5R1/MYO1C/FLNA/ACSL3/GOLPH3L/HRAS
GO:0036037	CD8-positive, alpha-beta T cell activation	6/1059	10/7709	0.00084865	0.0219787	0.0199824	6	CD274/TNFSF8/EOMES/TOX/PTPN22/CRTAM
GO:0006839	mitochondrial transport	22/1059	80/7709	0.000849629	0.0219787	0.0199824	22	SLC25A13/AGK/SLC25A31/TOMM40/SLC25A38/UCP2/SLC25A15/ATP5PO/ATPSCKMT/AIP/MICU1/BCS1L/MPC2/TIMM29/TIMM44/SLC25A14/LOC102151856/BNIP3/BLOC1S2/SLC35F6/ATP5IF1/DNAJC19
GO:0030890	positive regulation of B cell proliferation	8/1059	17/7709	0.000948907	0.024369	0.0221556	8	PELI1/IL21/IL7/CD40/CLCF1/CARD11/SASH3/TLR9
GO:0051130	positive regulation of cellular component organization	75/1059	387/7709	0.000962912	0.0245508	0.0223209	75	AVIL/PPP1R10/IFNG/FLOT1/TNF/RAD21/WASHC5/NTRK2/PICK1/RAC2/ANXA1/ATP8A1/SRF/RNF20/PRKCE/CCDC88A/MET/FLT3LG/DLL1/TGFB1/GATA3/SPAST/LRRN1/DDHD2/CDC16/CAPRIN1/TOX/NCK1/PIK3R1/KATNBL1/ANAPC5/MAPKAPK5/TIAM1/TSG101/NOS1/MOB2/CUL3/ZMYND10/PPP3CA/DAG1/C2CD5/FAM162A/PLXNB1/PFDN2/CD28/RAP1A/FASLG/LOC403934/DDHD1/ARPC1A/STX18/RNF40/KAT7/TGFB3/SH2B1/GPR65/CHTOP/EVL/TNFSF14/DVL1/ENTR1/LOC479600/CD53/ABL1/RHOA/…
GO:0002443	leukocyte mediated immunity	30/1059	123/7709	0.000986734	0.0249785	0.0227097	30	LTA/TNF/RAC2/IL18RAP/IL18R1/IL4I1/IL21/HMCES/TGFB1/GATA3/DNASE1L3/CD8A/CD40/CD96/CRTAM/MILR1/TP53BP1/KLRD1/ZBTB1/TNFRSF1B/IL12B/C6/SASH3/IL7R/SMAD7/TLR9/KLRK1/SH2D1A/IL18/NCR3
GO:0031343	positive regulation of cell killing	9/1059	21/7709	0.0010466	0.0261606	0.0237845	9	IFNG/IL18RAP/IL21/CRTAM/KLRD1/IL12B/KLRK1/SH2D1A/NCR3
GO:0001910	regulation of leukocyte mediated cytotoxicity	10/1059	25/7709	0.00105558	0.0261606	0.0237845	10	IL18RAP/IL21/DNASE1L3/CRTAM/KLRD1/IL12B/IL7R/KLRK1/SH2D1A/NCR3
GO:0002763	positive regulation of myeloid leukocyte differentiation	10/1059	25/7709	0.00105558	0.0261606	0.0237845	10	IFNG/TNF/TGFB1/CD101/HCLS1/CREB1/IL12B/GPR68/CASP8/LIF
GO:0045597	positive regulation of cell differentiation	54/1059	261/7709	0.00107263	0.0263987	0.024001	54	TCF4/MAP3K5/IFNG/TNF/DLA-DQA1/ANXA1/SRF/SHB/ZC3H12A/IL4I1/FLT3LG/TGFB1/GATA3/KLF5/PKDCC/CAPRIN1/TOX/IL7/TIAM1/EGR3/ACVR1/CD101/ETS1/HCLS1/CD34/PLXNB1/ZNF365/CREB1/ZBTB16/ADIPOQ/RAP1A/LOC403934/C1QBP/PRKCH/ZBTB1/TNFRSF1B/MED1/ARHGEF2/KAT7/TGFB3/IL12B/GPR68/TNFSF14/SASH3/RANBP3L/IL7R/SMAD7/FLNA/ABL1/RHOA/CASP8/JUNB/IL18/LIF
GO:0009607	response to biotic stimulus	82/1059	432/7709	0.00108299	0.0264698	0.0240656	82	IFNG/LTA/TNF/DLA-DQA1/SLA/APOBEC3Z3/IRF5/CD274/IL18RAP/PRKCE/PELI1/ZC3H12A/TNFSF8/IL4I1/IL21/TGFB1/GATA3/IL17RC/METTL3/NPLOC4/MAVS/NCK1/CXCL13/CCL17/OAS3/NLRC5/OTULIN/IFNAR2/PTPN22/POLR3D/PPP1R15B/CYLD/NOS1/CD40/RAB29/CD96/RGS1/LCK/CD80/POLR3C/CFI/CRTAM/PARP9/DTX3L/GPATCH3/TRIM41/NFKBIA/KLRD1/MAP3K14/C1QBP/UBE2K/RNF216/AKAP8/TLR10/DDX41/IKZF3/MED1/VSIG4/ARHGEF2/SYT11/ABI3/IL12B/C6/PTGER4/IL7R/CII…
GO:0043270	positive regulation of ion transport	43/1059	197/7709	0.00112328	0.0272664	0.0247898	43	IFNG/TNF/AZIN1/EZR/ATP8A1/ABCB1/PRKCE/CALM2/ZC3H12A/DMAP1/TGFB1/EHD3/APBB3/MAVS/PIK3R1/GLRX/TRPC1/PTPN22/TSG101/ANO6/ATPSCKMT/RAB29/HCLS1/C2CD5/NFKBIA/NFE2L2/ADIPOQ/FASLG/MPC2/PPM1A/STIM2/PRELID1/TGFB3/GPR68/CDK5R1/MYO1C/FLNA/ABL1/ACSL3/THY1/GOLPH3L/PTGES/HRAS
GO:0030218	erythrocyte differentiation	14/1059	43/7709	0.00126399	0.0302674	0.0275183	14	SRF/GATA3/SLC25A38/LDB1/ETS1/HCLS1/SLC4A1/JAK3/MED1/CDK5RAP3/AHSP/KAT7/ARID4A/ATP5IF1
GO:0042102	positive regulation of T cell proliferation	14/1059	43/7709	0.00126399	0.0302674	0.0275183	14	ANXA1/CD274/IL21/IL2RA/NCK1/PTPN22/CD80/CD3E/CD28/JAK3/CARD11/IL12B/SASH3/IL18
GO:0051707	response to other organism	79/1059	416/7709	0.00131222	0.0312114	0.0283765	79	IFNG/LTA/TNF/DLA-DQA1/SLA/APOBEC3Z3/IRF5/CD274/IL18RAP/PRKCE/PELI1/ZC3H12A/TNFSF8/IL21/TGFB1/GATA3/IL17RC/METTL3/NPLOC4/MAVS/NCK1/CXCL13/CCL17/OAS3/NLRC5/OTULIN/IFNAR2/PTPN22/POLR3D/CYLD/NOS1/CD40/RAB29/CD96/RGS1/LCK/CD80/POLR3C/CFI/CRTAM/PARP9/DTX3L/GPATCH3/TRIM41/NFKBIA/KLRD1/MAP3K14/C1QBP/UBE2K/RNF216/AKAP8/TLR10/DDX41/IKZF3/MED1/VSIG4/ARHGEF2/SYT11/IL12B/C6/PTGER4/IL7R/CIITA/DAPK3/MYO1C/CACTI…
GO:0090316	positive regulation of intracellular protein transport	15/1059	48/7709	0.00137572	0.0325036	0.0295513	15	IFNG/ZC3H12A/DMAP1/TGFB1/MAVS/PIK3R1/PTPN22/RAB29/HCLS1/C2CD5/PPM1A/CDK5R1/MYO1C/FLNA/HRAS
GO:0031341	regulation of cell killing	11/1059	30/7709	0.00139761	0.0328021	0.0298228	11	IFNG/IL18RAP/IL21/DNASE1L3/CRTAM/KLRD1/IL12B/IL7R/KLRK1/SH2D1A/NCR3
GO:0043207	response to external biotic stimulus	79/1059	417/7709	0.00140865	0.0328438	0.0298607	79	IFNG/LTA/TNF/DLA-DQA1/SLA/APOBEC3Z3/IRF5/CD274/IL18RAP/PRKCE/PELI1/ZC3H12A/TNFSF8/IL21/TGFB1/GATA3/IL17RC/METTL3/NPLOC4/MAVS/NCK1/CXCL13/CCL17/OAS3/NLRC5/OTULIN/IFNAR2/PTPN22/POLR3D/CYLD/NOS1/CD40/RAB29/CD96/RGS1/LCK/CD80/POLR3C/CFI/CRTAM/PARP9/DTX3L/GPATCH3/TRIM41/NFKBIA/KLRD1/MAP3K14/C1QBP/UBE2K/RNF216/AKAP8/TLR10/DDX41/IKZF3/MED1/VSIG4/ARHGEF2/SYT11/IL12B/C6/PTGER4/IL7R/CIITA/DAPK3/MYO1C/CACTI…
GO:1990542	mitochondrial transmembrane transport	13/1059	39/7709	0.00146642	0.0339673	0.0308821	13	SLC25A13/SLC25A31/TOMM40/SLC25A38/UCP2/SLC25A15/ATP5PO/ATPSCKMT/MICU1/MPC2/TIMM44/LOC102151856/DNAJC19
GO:0001912	positive regulation of leukocyte mediated cytotoxicity	8/1059	18/7709	0.00150413	0.0340135	0.0309241	8	IL18RAP/IL21/CRTAM/KLRD1/IL12B/KLRK1/SH2D1A/NCR3
GO:0043368	positive T cell selection	8/1059	18/7709	0.00150413	0.0340135	0.0309241	8	THEMIS/SRF/TOX/CD3G/CD3E/STAT3/DOCK2/BCL11B
GO:0043370	regulation of CD4-positive, alpha-beta T cell differentiation	8/1059	18/7709	0.00150413	0.0340135	0.0309241	8	IFNG/ANXA1/SHB/ZC3H12A/GATA3/SASH3/SMAD7/IL18
GO:0046637	regulation of alpha-beta T cell differentiation	10/1059	26/7709	0.00150681	0.0340135	0.0309241	10	IFNG/ANXA1/SHB/ZC3H12A/GATA3/ZBTB16/SASH3/SMAD7/RHOA/IL18
GO:0051253	negative regulation of RNA metabolic process	78/1059	412/7709	0.00153743	0.0344852	0.031353	78	IFNG/TNF/EZR/RING1/L3MBTL2/EGR1/TRERF1/SRF/SMARCA2/ZNF8/ZNF10/RNF20/CBX3/ZC3H12A/TRDMT1/ZNF296/SUV39H2/DMAP1/TGFB1/GATA3/KLF5/SFMBT2/SUPT5H/TAF7/NR2C1/CBX5/LIN37/NCK1/HEY1/PCGF1/CCNT1/ANKRD2/TSG101/CCAR2/CRY2/LDB1/PCBP4/PPP3CA/NFKB1/ZNF639/HCLS1/KDM2A/PARP15/RFX5/ARID5B/LOC490647/SIRT1/CREB1/ADIPOQ/EIF4A2/MEIOC/FASLG/COPS2/POU2F1/C1QBP/FOXP3/ZNF12/KDM5C/MED1/UIMC1/RNF40/KAT7/RLIM/ZC3H14/PIAS1/YY1…
GO:0042267	natural killer cell mediated cytotoxicity	9/1059	22/7709	0.00155764	0.0345018	0.031368	9	IL18RAP/IL21/CRTAM/KLRD1/IL12B/KLRK1/SH2D1A/IL18/NCR3
GO:1904591	positive regulation of protein import	9/1059	22/7709	0.00155764	0.0345018	0.031368	9	IFNG/ZC3H12A/DMAP1/TGFB1/MAVS/PIK3R1/PTPN22/HCLS1/FLNA
GO:0050868	negative regulation of T cell activation	14/1059	44/7709	0.0016237	0.0355209	0.0322946	14	ANXA1/CD274/PELI1/ZC3H12A/IL4I1/IL2RA/PTPN22/TIGIT/CD80/CRTAM/CTLA4/VSIG4/SMAD7/SDC4
GO:1903038	negative regulation of leukocyte cell-cell adhesion	14/1059	44/7709	0.0016237	0.0355209	0.0322946	14	ANXA1/CD274/PELI1/ZC3H12A/IL4I1/IL2RA/PTPN22/TIGIT/CD80/CRTAM/CTLA4/VSIG4/SMAD7/SDC4
GO:0014015	positive regulation of gliogenesis	6/1059	11/7709	0.00165068	0.0356708	0.0324309	6	TNF/TGFB1/ZNF365/PRKCH/TNFRSF1B/LIF
GO:0031440	regulation of mRNA 3'-end processing	6/1059	11/7709	0.00165068	0.0356708	0.0324309	6	RNF20/SUPT5H/CCNT1/RNF40/ZC3H14/CDK9
GO:0016567	protein ubiquitination	56/1059	278/7709	0.00167932	0.0360699	0.0327937	56	RNF19A/RING1/RNF146/RNF20/PRKCE/COMMD1/PELI1/CNOT4/CDC16/ARRDC3/ANAPC5/PCGF1/DDB2/PTPN22/AKTIP/CUL3/CISH/ASB7/UBA7/DTX3L/TRIM41/MAGEF1/SENP2/NFE2L2/TRIM69/KLHL22/TMEM129/BIRC3/UBE2L3/PPIL2/UBE2K/RNF216/DDB1/PRR7/RNF111/RNF40/CDK5RAP3/KCTD13/RLIM/DCUN1D3/FBXO22/WSB1/SMAD7/KLHL17/UBE4B/RNF166/ABL1/KLHL36/ASB6/TRIM7/RNFT1/TRIM17/RNF8/CDK9/UBE2G2/RNF125
GO:0045637	regulation of myeloid cell differentiation	21/1059	79/7709	0.0017647	0.0376753	0.0342533	21	IFNG/TNF/CNOT4/DLL1/TGFB1/PIK3R1/CD101/LDB1/ETS1/HCLS1/NFKBIA/CREB1/ZBTB16/ADIPOQ/FBN1/MED1/KAT7/IL12B/GPR68/CASP8/LIF
GO:1990778	protein localization to cell periphery	29/1059	122/7709	0.00182106	0.0386457	0.0351356	29	FLOT1/TNF/EZR/EFR3A/CCDC88A/EHD3/PKDCC/PIK3R1/SYS1/EHD4/TSPAN5/PKP2/DAG1/EPB41/C2CD5/ADIPOQ/RAP1A/SLC4A1/PPIL2/ABI3/IFT20/FLNA/LOC479600/ZDHHC7/PDZD11/ACSL3/GOLPH3L/PID1/HRAS
GO:0045639	positive regulation of myeloid cell differentiation	13/1059	40/7709	0.00190407	0.0401668	0.0365185	13	IFNG/TNF/TGFB1/CD101/ETS1/HCLS1/CREB1/MED1/KAT7/IL12B/GPR68/CASP8/LIF
GO:0010638	positive regulation of organelle organization	46/1059	220/7709	0.00195874	0.0410755	0.0373447	46	PPP1R10/TNF/RAD21/WASHC5/PICK1/ANXA1/RNF20/PRKCE/CCDC88A/MET/GATA3/SPAST/DDHD2/CDC16/NCK1/KATNBL1/ANAPC5/MAPKAPK5/NOS1/CUL3/ZMYND10/C2CD5/FAM162A/PFDN2/CD28/DDHD1/ARPC1A/STX18/RNF40/KAT7/TGFB3/SH2B1/GPR65/CHTOP/EVL/ENTR1/ABL1/RHOA/ARPC4/PPM1E/CDK9/SDC4/LIF/HRAS/MIEF1/ATP5IF1
GO:0034101	erythrocyte homeostasis	14/1059	45/7709	0.00206464	0.0430418	0.0391324	14	SRF/GATA3/SLC25A38/LDB1/ETS1/HCLS1/SLC4A1/JAK3/MED1/CDK5RAP3/AHSP/KAT7/ARID4A/ATP5IF1
GO:0042306	regulation of protein import into nucleus	10/1059	27/7709	0.00210269	0.0435786	0.0396205	10	IFNG/RAB23/ZC3H12A/DMAP1/TGFB1/MAVS/PIK3R1/PTPN22/HCLS1/FLNA
GO:0010390	histone monoubiquitination	7/1059	15/7709	0.00212669	0.0438196	0.0398396	7	RING1/RNF20/PCGF1/DDB2/DTX3L/DDB1/RNF40
GO:0002698	negative regulation of immune effector process	15/1059	50/7709	0.00217091	0.0442849	0.0402626	15	TNF/ANXA1/ZC3H12A/IL4I1/TGFB1/NPLOC4/CD96/GPATCH3/KLRD1/C1QBP/VSIG4/TGFB3/IL7R/SMAD7/RNF125
GO:0071345	cellular response to cytokine stimulus	55/1059	275/7709	0.00217426	0.0442849	0.0402626	55	STAT6/IFNG/TNF/SLC12A2/EGR1/IRF5/IL18RAP/IL18R1/UGCG/ZC3H12A/GATA3/KLF5/METTL3/MAVS/IL7/CXCL13/CCL17/NLRC5/OTULIN/IL10RB/IFNAR2/CD40/ADIPOR1/HCLS1/PARP9/ARID5B/NFKBIA/NFE2L2/CREB1/ADIPOQ/EIF4A2/PCOLCE/SPOCK2/GNPNAT1/JAK3/STAT3/UBE2K/DDX41/MED1/ARHGEF2/IL12B/IL12RB2/SMAD7/EBI3/DAPK3/MYO1C/CDIP1/CACTIN/IRAK1/IL18/CDK9/PID1/UBE2G2/RNF125/CCL22
GO:1903827	regulation of cellular protein localization	40/1059	186/7709	0.00220074	0.0444168	0.0403825	40	IFNG/TNF/EZR/RAB23/CCDC88A/ZC3H12A/DMAP1/TGFB1/MAVS/PKDCC/PIK3R1/PTPN22/TSG101/RAB29/DAG1/HCLS1/EPB41/C2CD5/DTX3L/DVL3/ADIPOQ/RAP1A/PPM1A/MSN/CDK5RAP3/SYT11/ABI3/KAT7/CDK5R1/MYO1C/DVL1/FLNA/ENTR1/ZDHHC7/ACSL3/PID1/LIF/HRAS/UBE2G2/ATP5IF1
GO:0048872	homeostasis of number of cells	26/1059	107/7709	0.00220921	0.0444168	0.0403825	26	ANXA1/SRF/FLT3LG/CCR4/GATA3/SLC25A38/IL2RA/IL7/LDB1/ETS1/HCLS1/SLC37A4/SLC4A1/JAK3/AKT3/CARD11/MED1/CDK5RAP3/AHSP/KAT7/SASH3/IL7R/ABL1/ARID4A/TSC22D3/ATP5IF1
GO:0071706	tumor necrosis factor superfamily cytokine production	16/1059	55/7709	0.00223086	0.0444168	0.0403825	16	IFNG/CD274/ZC3H12A/MAVS/PIK3R1/PTPN22/CD2/ARFGEF2/CD34/ADIPOQ/ARHGEF2/SYT11/IL12B/SASH3/CACTIN/TLR9
GO:1903555	regulation of tumor necrosis factor superfamily cytokine production	16/1059	55/7709	0.00223086	0.0444168	0.0403825	16	IFNG/CD274/ZC3H12A/MAVS/PIK3R1/PTPN22/CD2/ARFGEF2/CD34/ADIPOQ/ARHGEF2/SYT11/IL12B/SASH3/CACTIN/TLR9
GO:0042531	positive regulation of tyrosine phosphorylation of STAT protein	9/1059	23/7709	0.00225101	0.0445675	0.0405196	9	IFNG/IL21/CD40/HCLS1/CLCF1/GH1/IL12B/IL18/LIF
GO:0034504	protein localization to nucleus	27/1059	113/7709	0.00237943	0.0468484	0.0425932	27	IFNG/KPNA5/SUN2/TAF8/RAB23/ZC3H12A/DMAP1/TGFB1/MAVS/PIK3R1/PTPN22/CRY2/MORC3/NUP153/PPP3CA/HCLS1/DTX3L/NFKBIA/CTDNEP1/MED1/CDK5RAP3/KAT7/DVL1/FLNA/LOC106557472/CNEP1R1/LIF
GO:0045661	regulation of myoblast differentiation	11/1059	32/7709	0.00254372	0.0498062	0.0452824	11	MAP3K5/TNF/FLT3LG/DLL1/TGFB1/CCL17/ANKRD2/TRIP4/TNFSF14/RANBP3L/IL18

## Sheet: module_yellow2
TABLE S3. Complete results of functional enrichment analyses.
Term ID	Description	GeneRatio	BgRatio	pvalue	p.adjust	qvalue	Count	Gene IDs
GO:0002902	regulation of B cell apoptotic process	3/24	11/7709	4.3044e-06	0.00405334	0.0031873	3	BAX/IL10/BCL10
GO:0001783	B cell apoptotic process	3/24	13/7709	7.43051e-06	0.00405334	0.0031873	3	BAX/IL10/BCL10
GO:0070228	regulation of lymphocyte apoptotic process	3/24	23/7709	4.50806e-05	0.0163943	0.0128915	3	BAX/IL10/BCL10
GO:0070227	lymphocyte apoptotic process	3/24	30/7709	0.000101878	0.0270469	0.021268	3	BAX/IL10/BCL10
GO:2000106	regulation of leukocyte apoptotic process	3/24	32/7709	0.000123955	0.0270469	0.021268	3	BAX/IL10/BCL10
GO:0071887	leukocyte apoptotic process	3/24	39/7709	0.000225147	0.0386057	0.0303571	3	BAX/IL10/BCL10
GO:0051091	positive regulation of DNA-binding transcription factor activity	4/24	107/7709	0.000300989	0.0386057	0.0303571	4	RIPK2/IL10/STK36/BCL10
GO:2001056	positive regulation of cysteine-type endopeptidase activity	3/24	45/7709	0.000345324	0.0386057	0.0303571	3	BAX/RIPK2/BCL10
GO:0001782	B cell homeostasis	2/24	10/7709	0.000411715	0.0386057	0.0303571	2	BAX/BCL10
GO:2000108	positive regulation of leukocyte apoptotic process	2/24	10/7709	0.000411715	0.0386057	0.0303571	2	BAX/IL10
GO:0031497	chromatin assembly	3/24	51/7709	0.000500618	0.0386057	0.0303571	3	BEND3/H4C8/H4C9
GO:0006336	DNA replication-independent nucleosome assembly	2/24	11/7709	0.000502251	0.0386057	0.0303571	2	H4C8/H4C9
GO:0010950	positive regulation of endopeptidase activity	3/24	52/7709	0.000530184	0.0386057	0.0303571	3	BAX/RIPK2/BCL10
GO:0044419	biological process involved in interspecies interaction between organisms	7/24	496/7709	0.000578554	0.0386057	0.0303571	7	EXT1/BAX/CHMP4B/RIPK2/IRAK4/IL10/BCL10
GO:0010952	positive regulation of peptidase activity	3/24	54/7709	0.000592627	0.0386057	0.0303571	3	BAX/RIPK2/BCL10
GO:0034724	DNA replication-independent nucleosome organization	2/24	12/7709	0.000601556	0.0386057	0.0303571	2	H4C8/H4C9
GO:0045652	regulation of megakaryocyte differentiation	2/24	12/7709	0.000601556	0.0386057	0.0303571	2	H4C8/H4C9
GO:0001974	blood vessel remodeling	2/24	13/7709	0.000709579	0.0419878	0.0330166	2	EXT1/BAX
GO:0006352	DNA-templated transcription, initiation	3/24	58/7709	0.000731227	0.0419878	0.0330166	3	GTF2F1/H4C8/H4C9
GO:0006323	DNA packaging	3/24	61/7709	0.000847684	0.0440848	0.0346656	3	BEND3/H4C8/H4C9
GO:0060249	anatomical structure homeostasis	4/24	142/7709	0.000880287	0.0440848	0.0346656	4	EXT1/BAX/CHMP4B/NABP2
GO:0006333	chromatin assembly or disassembly	3/24	62/7709	0.00088897	0.0440848	0.0346656	3	BEND3/H4C8/H4C9
